# Supplementary material
Source: publisher figshare collection journal article supplement (https://acs.figshare.com/ndownloader/files/4314817)
Supplement: Supplementary file 1 [file 4314817]

#=============================================================================

# 1. SUBMISSION DETAILS

_publ_contact_author_name         'Jian-Fang Ma'
_publ_contact_author_address
;
Department of Chemistry
Northeast Normal University
Changchun 130024
P.R.China
;
_publ_contact_author_email        jianfangma@yahoo.com.cn
_publ_contact_author_fax          +86-431-85098620
_publ_contact_author_phone       +86-431-85098620
_publ_requested_journal            'Crystal Growth & Design'

#============================================================================= 

data_1
 
_audit_creation_method            SHELXL-97
_chemical_name_systematic
;
 ?
;
_chemical_name_common             ?
_chemical_melting_point           ?
_chemical_formula_moiety         'C35 H48 Cu4 N10 O40 Si W12'
_chemical_formula_sum
 'C35 H48 Cu4 N10 O40 Si W12'
_chemical_formula_weight          3737.28
 
loop_
 _atom_type_symbol
 _atom_type_description
 _atom_type_scat_dispersion_real
 _atom_type_scat_dispersion_imag
 _atom_type_scat_source
 'C'  'C'   0.0033   0.0016
 'International Tables Vol C Tables 4.2.6.8 and 6.1.1.4'
 'H'  'H'   0.0000   0.0000
 'International Tables Vol C Tables 4.2.6.8 and 6.1.1.4'
 'N'  'N'   0.0061   0.0033
 'International Tables Vol C Tables 4.2.6.8 and 6.1.1.4'
 'O'  'O'   0.0106   0.0060
 'International Tables Vol C Tables 4.2.6.8 and 6.1.1.4'
 'Cu'  'Cu'   0.3201   1.2651
 'International Tables Vol C Tables 4.2.6.8 and 6.1.1.4'
 'W'  'W'  -0.8490   6.8722
 'International Tables Vol C Tables 4.2.6.8 and 6.1.1.4'
 'Si'  'Si'   0.0817   0.0704
 'International Tables Vol C Tables 4.2.6.8 and 6.1.1.4'
 
_symmetry_cell_setting            monoclinic
_symmetry_space_group_name_H-M     'P 21/n'
_symmetry_space_group_name_hall   '-P 2yn  '
 
loop_
 _symmetry_equiv_pos_as_xyz
 'x, y, z'
 '-x+1/2, y+1/2, -z+1/2'
 '-x, -y, -z'
 'x-1/2, -y-1/2, z-1/2'
 
_cell_length_a                    12.9036(5)
_cell_length_b                    11.9095(3)
_cell_length_c                    22.3016(10)
_cell_angle_alpha                 90.00
_cell_angle_beta                  91.791(4)
_cell_angle_gamma                 90.00
_cell_volume                      3425.5(2)
_cell_formula_units_Z             2
_cell_measurement_temperature     293(2)
_cell_measurement_reflns_used     6247
_cell_measurement_theta_min       4.3
_cell_measurement_theta_max       25.4
 
_exptl_crystal_description        block
_exptl_crystal_colour             red
_exptl_crystal_size_max           0.16
_exptl_crystal_size_mid           0.12
_exptl_crystal_size_min           0.10
_exptl_crystal_density_meas       ?
_exptl_crystal_density_diffrn     3.623
_exptl_crystal_density_method     'not measured'
_exptl_crystal_F_000              3332
_exptl_absorpt_coefficient_mu     21.378
_exptl_absorpt_correction_type     multi-scan
_exptl_absorpt_correction_T_min   0.07
_exptl_absorpt_correction_T_max   0.12
_exptl_absorpt_process_details    
;
CrysAlis (Oxford Diffraction, 2006)
; 
_exptl_special_details
;
 ?
;
 
_diffrn_ambient_temperature       293(2)
_diffrn_radiation_wavelength      0.71073
_diffrn_radiation_type            MoK\a
_diffrn_radiation_source          'fine-focus sealed tube'
_diffrn_radiation_monochromator   graphite
_diffrn_measurement_device_type   'Oxford Diffraction Gemini R Ultra'
_diffrn_measurement_method        '\w scan'
_diffrn_detector_area_resol_mean  10.0
_diffrn_standards_number          ?
_diffrn_standards_interval_count  ?
_diffrn_standards_interval_time   ?
_diffrn_standards_decay_%         ?
_diffrn_reflns_number             27325
_diffrn_reflns_av_R_equivalents   0.1012
_diffrn_reflns_av_sigmaI/netI     0.1275
_diffrn_reflns_limit_h_min        -15
_diffrn_reflns_limit_h_max        15
_diffrn_reflns_limit_k_min        -14
_diffrn_reflns_limit_k_max        14
_diffrn_reflns_limit_l_min        -26
_diffrn_reflns_limit_l_max        26
_diffrn_reflns_theta_min          4.29
_diffrn_reflns_theta_max          25.35
_reflns_number_total              6247
_reflns_number_gt                 2675
_reflns_threshold_expression      >2\s(I)
 
_computing_data_collection         'CrysAlis (Oxford Diffraction, 2006)'
_computing_cell_refinement        'CrysAlis'
_computing_data_reduction         'CrysAlis'
_computing_structure_solution     'SHELXS-97 (Sheldrick, 1997)'
_computing_structure_refinement   'SHELXL-97 (Sheldrick, 2008)'
_computing_molecular_graphics     ?
_computing_publication_material   ?
 
_refine_special_details
;
 Refinement of F^2^ against ALL reflections.  The weighted R-factor wR and
 goodness of fit S are based on F^2^, conventional R-factors R are based
 on F, with F set to zero for negative F^2^. The threshold expression of
 F^2^ > 2\s(F^2^) is used only for calculating R-factors(gt) etc. and is
 not relevant to the choice of reflections for refinement.  R-factors based
 on F^2^ are statistically about twice as large as those based on F, and R-
 factors based on ALL data will be even larger.
;
 
_refine_ls_structure_factor_coef  Fsqd
_refine_ls_matrix_type            full
_refine_ls_weighting_scheme       calc
_refine_ls_weighting_details
 'calc w=1/[\s^2^(Fo^2^)+(0.0708P)^2^+0.0000P] where P=(Fo^2^+2Fc^2^)/3'
_atom_sites_solution_primary      direct
_atom_sites_solution_secondary    difmap
_atom_sites_solution_hydrogens    geom
_refine_ls_hydrogen_treatment     constr
_refine_ls_extinction_method      none
_refine_ls_extinction_coef        ?
_refine_ls_number_reflns          6247
_refine_ls_number_parameters      480
_refine_ls_number_restraints      43
_refine_ls_R_factor_all           0.1604
_refine_ls_R_factor_gt            0.0582
_refine_ls_wR_factor_ref          0.1477
_refine_ls_wR_factor_gt           0.1212
_refine_ls_goodness_of_fit_ref    0.874
_refine_ls_restrained_S_all       0.880
_refine_ls_shift/su_max           0.001
_refine_ls_shift/su_mean          0.000
 
loop_
 _atom_site_label
 _atom_site_type_symbol
 _atom_site_fract_x
 _atom_site_fract_y
 _atom_site_fract_z
 _atom_site_U_iso_or_equiv
 _atom_site_adp_type
 _atom_site_occupancy
 _atom_site_symmetry_multiplicity
 _atom_site_calc_flag
 _atom_site_refinement_flags
 _atom_site_disorder_assembly
 _atom_site_disorder_group
Cu1 Cu 0.7698(3) 0.5199(3) 1.05743(19) 0.1084(14) Uani 1 1 d . . .
Cu2 Cu 0.3561(2) 0.4959(2) 1.22546(13) 0.0630(8) Uani 1 1 d . . .
W1 W 0.56729(8) 0.09752(7) 0.85672(5) 0.0641(3) Uani 1 1 d . . .
W2 W 0.69482(9) -0.09253(7) 1.10301(5) 0.0724(4) Uani 1 1 d . . .
W3 W 0.56276(9) 0.16086(7) 1.12975(5) 0.0698(3) Uani 1 1 d . . .
W4 W 0.76254(9) 0.00145(8) 0.95824(6) 0.0932(5) Uani 1 1 d . . .
W5 W 0.63274(8) 0.25397(7) 0.98512(7) 0.0921(5) Uani 1 1 d . . .
W6 W 0.36918(10) 0.25292(7) 1.02523(6) 0.0992(5) Uani 1 1 d . . .
C1 C 0.560(2) 0.508(2) 1.0864(12) 0.075(7) Uani 1 1 d . . .
H1 H 0.5491 0.4921 1.0459 0.090 Uiso 1 1 calc R . .
C2 C 0.482(2) 0.5090(18) 1.1249(13) 0.068(7) Uani 1 1 d . . .
H2 H 0.4163 0.4930 1.1084 0.082 Uiso 1 1 calc R . .
C3 C 0.5779(18) 0.5579(17) 1.2043(10) 0.055(6) Uani 1 1 d . . .
C4 C 0.583(2) 0.593(3) 1.2704(12) 0.108(10) Uani 1 1 d . . .
H4A H 0.6016 0.6704 1.2735 0.162 Uiso 1 1 calc R . .
H4B H 0.6342 0.5479 1.2916 0.162 Uiso 1 1 calc R . .
H4C H 0.5166 0.5810 1.2876 0.162 Uiso 1 1 calc R . .
C5 C 0.6652(18) 0.5529(18) 1.1697(14) 0.063(7) Uani 1 1 d . . .
C6 C 0.773(2) 0.576(2) 1.1934(15) 0.109(10) Uani 1 1 d U . .
H6A H 0.8121 0.6126 1.1626 0.130 Uiso 1 1 calc R . .
H6B H 0.7702 0.6257 1.2276 0.130 Uiso 1 1 calc R . .
C7 C 0.823(4) 0.475(4) 1.211(2) 0.181(17) Uani 1 1 d U . .
H7A H 0.7811 0.4359 1.2388 0.272 Uiso 1 1 calc R . .
H7B H 0.8892 0.4919 1.2290 0.272 Uiso 1 1 calc R . .
H7C H 0.8318 0.4289 1.1759 0.272 Uiso 1 1 calc R . .
C8 C 0.2155(18) 0.1822(17) 1.1994(10) 0.059(6) Uani 1 1 d . . .
H8 H 0.1745 0.1492 1.1692 0.071 Uiso 1 1 calc R . .
C9 C 0.2996(16) 0.1734(17) 1.2929(10) 0.050(5) Uani 1 1 d . . .
C10 C 0.2556(18) 0.2842(16) 1.1892(12) 0.062(6) Uani 1 1 d . . .
H10 H 0.2397 0.3209 1.1533 0.074 Uiso 1 1 calc R . .
C11 C 0.3431(16) 0.2783(18) 1.2811(11) 0.057(6) Uani 1 1 d . . .
C12 C 0.422(2) 0.331(2) 1.3269(14) 0.097(10) Uani 1 1 d . . .
H12A H 0.4082 0.4102 1.3307 0.146 Uiso 1 1 calc R . .
H12B H 0.4913 0.3210 1.3131 0.146 Uiso 1 1 calc R . .
H12C H 0.4159 0.2957 1.3652 0.146 Uiso 1 1 calc R . .
C13 C 0.320(2) 0.103(2) 1.3486(12) 0.079(7) Uani 1 1 d U . .
H13A H 0.2625 0.0519 1.3547 0.095 Uiso 1 1 calc R . .
H13B H 0.3281 0.1505 1.3837 0.095 Uiso 1 1 calc R . .
C14 C 0.420(3) 0.035(3) 1.3397(16) 0.142(14) Uani 1 1 d . . .
H14A H 0.4154 -0.0031 1.3018 0.214 Uiso 1 1 calc R . .
H14B H 0.4289 -0.0187 1.3714 0.214 Uiso 1 1 calc R . .
H14C H 0.4783 0.0854 1.3401 0.214 Uiso 1 1 calc R . .
C15 C 0.9501(19) 0.407(2) 1.0205(11) 0.069(7) Uani 1 1 d . . .
C16 C 0.9531(18) 0.601(2) 1.0063(10) 0.074(8) Uani 1 1 d . . .
C17 C 0.901(4) 0.303(4) 1.049(2) 0.080(15) Uani 0.50 1 d PD . .
H17A H 0.8437 0.3328 1.0709 0.096 Uiso 0.50 1 calc PR . .
H17B H 0.8703 0.2624 1.0152 0.096 Uiso 0.50 1 calc PR . .
C18 C 0.947(6) 0.213(5) 1.089(3) 0.15(3) Uani 0.50 1 d PDU . .
H18A H 1.0124 0.2387 1.1059 0.228 Uiso 0.50 1 calc PR . .
H18B H 0.9573 0.1464 1.0662 0.228 Uiso 0.50 1 calc PR . .
H18C H 0.9006 0.1981 1.1208 0.228 Uiso 0.50 1 calc PR . .
C19 C 0.908(5) 0.719(4) 1.026(3) 0.12(2) Uani 0.50 1 d P . .
H19A H 0.8707 0.7105 1.0617 0.174 Uiso 0.50 1 calc PR . .
H19B H 0.8629 0.7472 0.9942 0.174 Uiso 0.50 1 calc PR . .
H19C H 0.9646 0.7706 1.0325 0.174 Uiso 0.50 1 calc PR . .
N1 N 0.6573(15) 0.5312(14) 1.1098(11) 0.065(6) Uani 1 1 d . . .
N2 N 0.4858(13) 0.5296(11) 1.1827(9) 0.047(5) Uani 1 1 d . . .
N3 N 0.2321(13) 0.1248(12) 1.2515(9) 0.052(5) Uani 1 1 d . . .
N4 N 0.3200(16) 0.3351(14) 1.2315(9) 0.063(5) Uani 1 1 d . . .
N5 N 0.9044(14) 0.5096(18) 1.0273(9) 0.072(6) Uani 1 1 d . . .
O1 O 0.4757(18) 0.0078(17) 0.9357(10) 0.037(6) Uani 0.50 1 d P . .
O2 O 0.5757(16) 0.0679(15) 0.9535(10) 0.027(5) Uiso 0.50 1 d P A .
O3 O 0.6206(17) -0.0664(16) 1.0162(10) 0.032(5) Uiso 0.50 1 d P . .
O4 O 0.521(2) 0.1265(17) 1.0348(12) 0.049(7) Uani 0.50 1 d P . .
O5 O 0.6941(15) 0.0387(15) 0.8778(10) 0.110(6) Uani 1 1 d U A .
O6 O 0.8852(14) -0.0006(14) 0.9384(8) 0.099(6) Uani 1 1 d . A .
O7 O 0.5982(16) 0.1452(17) 0.7882(10) 0.121(7) Uiso 1 1 d . . .
O8 O 0.4294(11) 0.1389(10) 0.8594(6) 0.061(4) Uani 1 1 d . . .
O9 O 0.6727(11) 0.0553(10) 1.1323(7) 0.065(4) Uani 1 1 d . A .
O10 O 0.7891(15) -0.1380(14) 1.1527(12) 0.136(9) Uani 1 1 d . A .
O11 O 0.4771(10) 0.0526(10) 1.1612(6) 0.050(4) Uani 1 1 d . . .
O12 O 0.481(2) 0.276(2) 0.9780(13) 0.053(7) Uiso 0.50 1 d P A .
O12' O 0.5113(19) 0.333(2) 1.0088(12) 0.044(6) Uiso 0.50 1 d P A .
O13 O 0.3051(11) 0.3755(10) 1.0363(7) 0.063(4) Uani 1 1 d . A .
O14 O 0.7440(13) 0.1541(13) 0.9790(12) 0.134(9) Uani 1 1 d . A .
O15 O 0.5980(14) 0.2251(15) 0.8978(9) 0.102(6) Uani 1 1 d U A .
O17 O 0.5948(15) 0.2400(16) 1.1913(10) 0.129(8) Uani 1 1 d . A .
O18 O 0.6954(14) 0.3763(10) 0.9791(8) 0.091(6) Uani 1 1 d . A .
O20 O 0.4399(16) 0.2318(17) 1.0989(10) 0.126(7) Uani 1 1 d U A .
Si1 Si 0.5000 0.0000 1.0000 0.057(3) Uani 1 2 d S . .
O16 O 0.623(2) 0.209(2) 1.0522(14) 0.059(9) Uiso 0.52(2) 1 d P A 1
O19 O 0.305(2) 0.1411(18) 1.0649(12) 0.046(8) Uiso 0.52(2) 1 d P . 1
O21 O 0.805(2) -0.040(2) 1.0543(13) 0.062(9) Uiso 0.52(2) 1 d P A 1
O22 O 0.714(2) -0.2303(17) 1.0637(11) 0.043(7) Uiso 0.52(2) 1 d P . 1
O16' O 0.654(2) 0.263(2) 1.0865(13) 0.044(8) Uiso 0.48(2) 1 d P A 2
O19' O 0.236(2) 0.1617(19) 1.0447(12) 0.043(8) Uiso 0.48(2) 1 d P . 2
O21' O 0.738(2) -0.0152(18) 1.0254(12) 0.043(8) Uiso 0.48(2) 1 d P A 2
O22' O 0.643(3) -0.207(2) 1.0462(15) 0.063(10) Uiso 0.48(2) 1 d P . 2
 
loop_
 _atom_site_aniso_label
 _atom_site_aniso_U_11
 _atom_site_aniso_U_22
 _atom_site_aniso_U_33
 _atom_site_aniso_U_23
 _atom_site_aniso_U_13
 _atom_site_aniso_U_12
Cu1 0.070(2) 0.116(3) 0.143(4) 0.039(2) 0.064(2) 0.0269(19)
Cu2 0.0583(18) 0.0598(15) 0.072(2) -0.0120(14) 0.0211(15) -0.0033(13)
W1 0.0684(7) 0.0549(5) 0.0705(8) 0.0089(5) 0.0241(6) -0.0034(5)
W2 0.1061(9) 0.0496(5) 0.0628(8) 0.0024(5) 0.0264(6) -0.0032(5)
W3 0.0780(8) 0.0613(6) 0.0712(8) 0.0146(5) 0.0212(6) 0.0154(5)
W4 0.0836(8) 0.0504(5) 0.1500(13) -0.0233(6) 0.0738(8) -0.0196(5)
W5 0.0687(8) 0.0359(5) 0.1744(14) 0.0306(6) 0.0481(8) 0.0002(5)
W6 0.1299(11) 0.0374(5) 0.1356(12) 0.0264(6) 0.0869(9) 0.0252(6)
C1 0.064(19) 0.108(19) 0.053(17) 0.008(14) 0.018(15) -0.005(15)
C2 0.067(17) 0.072(14) 0.07(2) 0.008(14) 0.023(15) 0.035(12)
C3 0.040(15) 0.069(13) 0.056(17) -0.020(11) 0.011(12) -0.009(11)
C4 0.09(2) 0.16(3) 0.07(2) -0.05(2) -0.010(16) -0.017(19)
C5 0.043(16) 0.064(13) 0.08(2) -0.005(14) -0.018(15) -0.001(11)
C6 0.109(13) 0.110(12) 0.108(13) -0.008(9) 0.016(9) -0.003(9)
C7 0.179(19) 0.184(19) 0.180(19) 0.000(10) 0.004(10) -0.001(10)
C8 0.079(17) 0.057(13) 0.043(15) -0.016(12) 0.025(12) -0.008(12)
C9 0.047(14) 0.057(13) 0.045(15) -0.002(11) 0.000(11) 0.007(11)
C10 0.066(17) 0.047(12) 0.073(19) -0.003(12) 0.005(14) 0.008(11)
C11 0.040(14) 0.068(14) 0.063(18) -0.004(13) 0.008(12) 0.008(11)
C12 0.09(2) 0.077(16) 0.12(3) -0.011(16) -0.040(19) -0.018(14)
C13 0.082(11) 0.085(10) 0.070(11) -0.008(8) -0.010(9) 0.015(8)
C14 0.14(3) 0.15(3) 0.14(3) 0.05(2) 0.03(2) 0.06(2)
C15 0.058(17) 0.096(18) 0.052(16) 0.015(14) -0.001(13) 0.013(15)
C16 0.029(14) 0.15(2) 0.046(16) 0.014(16) -0.014(12) -0.007(16)
C17 0.07(3) 0.09(3) 0.09(4) 0.03(3) 0.04(3) 0.03(3)
C18 0.15(3) 0.16(3) 0.15(3) 0.005(10) 0.003(10) 0.000(10)
C19 0.11(5) 0.11(4) 0.13(6) -0.04(4) -0.04(4) 0.08(4)
N1 0.049(14) 0.058(11) 0.090(19) 0.020(11) 0.021(12) 0.004(9)
N2 0.030(11) 0.039(9) 0.073(15) 0.007(9) 0.021(10) 0.005(7)
N3 0.053(12) 0.039(8) 0.065(14) 0.007(9) 0.029(10) 0.023(8)
N4 0.077(15) 0.059(11) 0.053(14) -0.008(11) 0.005(11) 0.027(10)
N5 0.049(12) 0.092(15) 0.076(16) 0.003(12) 0.025(11) -0.012(12)
O1 0.056(17) 0.045(13) 0.010(15) -0.004(11) 0.008(12) 0.005(12)
O4 0.064(19) 0.023(11) 0.06(2) -0.009(12) -0.007(15) 0.007(11)
O5 0.100(9) 0.102(9) 0.127(10) -0.017(8) -0.022(8) 0.017(7)
O6 0.105(15) 0.115(13) 0.078(14) 0.032(10) 0.026(11) 0.037(11)
O8 0.079(11) 0.055(8) 0.049(10) 0.010(7) 0.005(8) -0.004(7)
O9 0.069(10) 0.051(7) 0.074(11) -0.001(8) -0.003(8) 0.007(7)
O10 0.082(15) 0.084(12) 0.24(3) 0.064(15) 0.001(16) 0.027(10)
O11 0.044(9) 0.049(7) 0.057(10) -0.001(7) -0.026(7) 0.011(6)
O13 0.071(11) 0.045(7) 0.074(12) -0.016(7) 0.002(8) 0.002(7)
O14 0.061(12) 0.062(10) 0.28(3) -0.081(13) 0.004(14) 0.018(8)
O15 0.094(9) 0.117(9) 0.094(9) -0.046(8) -0.029(8) 0.002(7)
O17 0.111(16) 0.117(14) 0.16(2) -0.109(14) 0.042(14) -0.023(12)
O18 0.127(16) 0.030(7) 0.118(15) 0.005(8) 0.022(12) -0.022(8)
O20 0.105(10) 0.131(10) 0.143(11) 0.063(8) 0.029(8) 0.026(8)
Si1 0.072(6) 0.019(3) 0.084(8) 0.003(4) 0.058(6) -0.002(4)
 
_geom_special_details
;
 All s.u.'s (except the s.u. in the dihedral angle between two l.s. planes)
 are estimated using the full covariance matrix.  The cell s.u.'s are taken
 into account individually in the estimation of s.u.'s in distances, angles
 and torsion angles; correlations between s.u.'s in cell parameters are only
 used when they are defined by crystal symmetry.  An approximate (isotropic)
 treatment of cell s.u.'s is used for estimating s.u.'s involving l.s. planes.
;
 
loop_
 _geom_bond_atom_site_label_1
 _geom_bond_atom_site_label_2
 _geom_bond_distance
 _geom_bond_site_symmetry_2
 _geom_bond_publ_flag
Cu1 N5 1.886(19) . ?
Cu1 N1 1.896(19) . ?
Cu2 N4 1.977(19) . ?
Cu2 N3 1.987(16) 2_557 ?
Cu2 N2 1.992(16) . ?
W1 O7 1.69(2) . ?
W1 O15 1.812(16) . ?
W1 O5 1.828(18) . ?
W1 O8 1.849(15) . ?
W1 O11 1.916(12) 3_657 ?
W1 O2 2.19(2) . ?
W1 O1 2.40(2) . ?
W2 O10 1.707(19) . ?
W2 O22 1.88(2) . ?
W2 O9 1.903(13) . ?
W2 O8 1.913(14) 3_657 ?
W2 O21 1.92(3) . ?
W2 O22' 1.96(3) . ?
W2 O21' 2.05(3) . ?
W2 O3 2.16(2) . ?
W3 O17 1.705(17) . ?
W3 O11 1.850(13) . ?
W3 O9 1.896(13) . ?
W3 O20 1.905(19) . ?
W3 O16' 1.96(3) . ?
W3 O16 2.00(3) . ?
W3 O4 2.21(3) . ?
W3 O1 2.52(2) 3_657 ?
W4 O21' 1.55(3) . ?
W4 O6 1.658(18) . ?
W4 O14 1.893(13) . ?
W4 O19' 1.94(2) 3_657 ?
W4 O19 1.97(2) 3_657 ?
W4 O5 2.02(2) . ?
W4 O21 2.25(3) . ?
W4 O3 2.41(2) . ?
W5 O16 1.60(3) . ?
W5 O18 1.674(13) . ?
W5 O14 1.873(15) . ?
W5 O12' 1.92(2) . ?
W5 O12 1.97(3) . ?
W5 O15 2.014(18) . ?
W5 O16' 2.27(3) . ?
W5 O4 2.39(3) . ?
W5 O2 2.432(19) . ?
W6 O22' 1.69(3) 3_657 ?
W6 O13 1.700(12) . ?
W6 O19 1.81(2) . ?
W6 O12 1.84(3) . ?
W6 O20 1.87(2) . ?
W6 O19' 2.09(3) . ?
W6 O12' 2.11(3) . ?
W6 O22 2.24(3) 3_657 ?
W6 O3 2.41(2) 3_657 ?
W6 O4 2.47(2) . ?
C1 C2 1.35(3) . ?
C1 N1 1.37(3) . ?
C2 N2 1.31(3) . ?
C3 N2 1.31(2) . ?
C3 C5 1.39(3) . ?
C3 C4 1.53(3) . ?
C5 N1 1.36(3) . ?
C5 C6 1.50(3) . ?
C6 C7 1.41(4) . ?
C8 C10 1.34(3) . ?
C8 N3 1.36(2) . ?
C9 N3 1.38(2) . ?
C9 C11 1.40(3) . ?
C9 C13 1.52(3) . ?
C10 N4 1.38(3) . ?
C11 N4 1.32(3) . ?
C11 C12 1.56(3) . ?
C13 C14 1.54(4) . ?
C15 N5 1.37(3) . ?
C15 C16 1.40(3) 3_767 ?
C15 C17 1.53(5) . ?
C16 N5 1.35(3) . ?
C16 C15 1.40(3) 3_767 ?
C16 C19 1.58(5) . ?
C17 C18 1.504(10) . ?
N3 Cu2 1.987(16) 2_547 ?
O1 Si1 1.46(2) . ?
O1 O2 1.52(3) . ?
O1 O4 1.73(3) 3_657 ?
O1 O3 1.81(3) 3_657 ?
O1 W3 2.52(2) 3_657 ?
O2 Si1 1.66(2) . ?
O3 O21' 1.63(3) . ?
O3 Si1 1.77(2) . ?
O3 O1 1.81(3) 3_657 ?
O3 O22' 1.82(3) . ?
O3 W6 2.41(2) 3_657 ?
O4 O16 1.68(4) . ?
O4 Si1 1.71(2) . ?
O4 O1 1.73(3) 3_657 ?
O8 W2 1.913(14) 3_657 ?
O11 W1 1.916(12) 3_657 ?
O12 O12' 1.03(3) . ?
Si1 O1 1.46(2) 3_657 ?
Si1 O2 1.66(2) 3_657 ?
Si1 O4 1.71(2) 3_657 ?
Si1 O3 1.77(2) 3_657 ?
O19 W4 1.97(2) 3_657 ?
O22 W6 2.24(3) 3_657 ?
O19' W4 1.94(2) 3_657 ?
O22' W6 1.69(3) 3_657 ?
 
loop_
 _geom_angle_atom_site_label_1
 _geom_angle_atom_site_label_2
 _geom_angle_atom_site_label_3
 _geom_angle
 _geom_angle_site_symmetry_1
 _geom_angle_site_symmetry_3
 _geom_angle_publ_flag
N5 Cu1 N1 162.8(10) . . ?
N4 Cu2 N3 126.3(7) . 2_557 ?
N4 Cu2 N2 115.5(7) . . ?
N3 Cu2 N2 117.7(6) 2_557 . ?
O7 W1 O15 97.0(10) . . ?
O7 W1 O5 97.2(10) . . ?
O15 W1 O5 90.7(8) . . ?
O7 W1 O8 101.2(8) . . ?
O15 W1 O8 87.4(7) . . ?
O5 W1 O8 161.5(8) . . ?
O7 W1 O11 101.7(8) . 3_657 ?
O15 W1 O11 161.3(8) . 3_657 ?
O5 W1 O11 87.5(7) . 3_657 ?
O8 W1 O11 88.5(6) . 3_657 ?
O7 W1 O2 160.2(9) . . ?
O15 W1 O2 68.5(8) . . ?
O5 W1 O2 70.6(9) . . ?
O8 W1 O2 91.7(7) . . ?
O11 W1 O2 93.5(6) 3_657 . ?
O7 W1 O1 161.5(9) . . ?
O15 W1 O1 96.1(9) . . ?
O5 W1 O1 95.7(9) . . ?
O8 W1 O1 66.3(7) . . ?
O11 W1 O1 65.6(7) 3_657 . ?
O2 W1 O1 38.3(8) . . ?
O10 W2 O22 85.7(11) . . ?
O10 W2 O9 100.5(9) . . ?
O22 W2 O9 172.3(9) . . ?
O10 W2 O8 102.3(9) . 3_657 ?
O22 W2 O8 94.3(9) . 3_657 ?
O9 W2 O8 88.9(6) . 3_657 ?
O10 W2 O21 86.8(12) . . ?
O22 W2 O21 85.0(11) . . ?
O9 W2 O21 90.8(9) . . ?
O8 W2 O21 170.7(10) 3_657 . ?
O10 W2 O22' 115.0(12) . . ?
O22 W2 O22' 30.9(9) . . ?
O9 W2 O22' 144.1(11) . . ?
O8 W2 O22' 78.9(10) 3_657 . ?
O21 W2 O22' 96.2(12) . . ?
O10 W2 O21' 119.0(11) . . ?
O22 W2 O21' 87.5(10) . . ?
O9 W2 O21' 85.5(8) . . ?
O8 W2 O21' 138.6(9) 3_657 . ?
O21 W2 O21' 32.2(9) . . ?
O22' W2 O21' 82.1(11) . . ?
O10 W2 O3 156.3(10) . . ?
O22 W2 O3 76.6(10) . . ?
O9 W2 O3 96.2(7) . . ?
O8 W2 O3 94.6(7) 3_657 . ?
O21 W2 O3 76.2(11) . . ?
O22' W2 O3 52.1(10) . . ?
O21' W2 O3 45.6(10) . . ?
O17 W3 O11 102.3(9) . . ?
O17 W3 O9 100.4(8) . . ?
O11 W3 O9 88.9(6) . . ?
O17 W3 O20 102.9(10) . . ?
O11 W3 O20 86.9(7) . . ?
O9 W3 O20 156.7(9) . . ?
O17 W3 O16' 85.5(11) . . ?
O11 W3 O16' 172.1(9) . . ?
O9 W3 O16' 88.0(8) . . ?
O20 W3 O16' 93.0(9) . . ?
O17 W3 O16 116.5(11) . . ?
O11 W3 O16 141.2(9) . . ?
O9 W3 O16 84.6(9) . . ?
O20 W3 O16 84.4(10) . . ?
O16' W3 O16 31.1(9) . . ?
O17 W3 O4 157.0(10) . . ?
O11 W3 O4 95.9(8) . . ?
O9 W3 O4 93.9(7) . . ?
O20 W3 O4 63.8(10) . . ?
O16' W3 O4 77.1(11) . . ?
O16 W3 O4 46.8(11) . . ?
O17 W3 O1 160.7(10) . 3_657 ?
O11 W3 O1 63.6(7) . 3_657 ?
O9 W3 O1 67.8(7) . 3_657 ?
O20 W3 O1 89.9(9) . 3_657 ?
O16' W3 O1 108.5(10) . 3_657 ?
O16 W3 O1 78.6(10) . 3_657 ?
O4 W3 O1 42.2(7) . 3_657 ?
O21' W4 O6 119.0(12) . . ?
O21' W4 O14 81.7(12) . . ?
O6 W4 O14 102.0(8) . . ?
O21' W4 O19' 84.7(11) . 3_657 ?
O6 W4 O19' 88.0(10) . 3_657 ?
O14 W4 O19' 165.9(11) . 3_657 ?
O21' W4 O19 92.2(11) . 3_657 ?
O6 W4 O19 109.8(10) . 3_657 ?
O14 W4 O19 146.3(9) . 3_657 ?
O19' W4 O19 30.2(8) 3_657 3_657 ?
O21' W4 O5 141.6(12) . . ?
O6 W4 O5 99.2(8) . . ?
O14 W4 O5 87.2(9) . . ?
O19' W4 O5 101.2(10) 3_657 . ?
O19 W4 O5 77.2(9) 3_657 . ?
O21' W4 O21 26.7(11) . . ?
O6 W4 O21 92.5(10) . . ?
O14 W4 O21 90.3(10) . . ?
O19' W4 O21 79.2(10) 3_657 . ?
O19 W4 O21 98.9(10) 3_657 . ?
O5 W4 O21 168.3(10) . . ?
O21' W4 O3 42.0(11) . . ?
O6 W4 O3 152.3(7) . . ?
O14 W4 O3 95.0(8) . . ?
O19' W4 O3 72.1(9) 3_657 . ?
O19 W4 O3 60.9(9) 3_657 . ?
O5 W4 O3 103.4(8) . . ?
O21 W4 O3 65.4(9) . . ?
O16 W5 O18 114.8(12) . . ?
O16 W5 O14 86.5(13) . . ?
O18 W5 O14 100.0(8) . . ?
O16 W5 O12' 79.5(12) . . ?
O18 W5 O12' 89.7(10) . . ?
O14 W5 O12' 165.4(11) . . ?
O16 W5 O12 90.7(13) . . ?
O18 W5 O12 110.9(10) . . ?
O14 W5 O12 147.0(9) . . ?
O12' W5 O12 30.7(8) . . ?
O16 W5 O15 145.7(12) . . ?
O18 W5 O15 99.4(8) . . ?
O14 W5 O15 88.2(9) . . ?
O12' W5 O15 101.0(10) . . ?
O12 W5 O15 75.8(10) . . ?
O16 W5 O16' 25.0(10) . . ?
O18 W5 O16' 89.9(9) . . ?
O14 W5 O16' 91.9(10) . . ?
O12' W5 O16' 77.1(10) . . ?
O12 W5 O16' 99.3(10) . . ?
O15 W5 O16' 170.5(9) . . ?
O16 W5 O4 44.5(12) . . ?
O18 W5 O4 152.9(9) . . ?
O14 W5 O4 96.1(9) . . ?
O12' W5 O4 70.9(9) . . ?
O12 W5 O4 60.7(9) . . ?
O15 W5 O4 102.7(8) . . ?
O16' W5 O4 67.8(9) . . ?
O16 W5 O2 86.2(11) . . ?
O18 W5 O2 155.8(8) . . ?
O14 W5 O2 68.0(7) . . ?
O12' W5 O2 106.6(9) . . ?
O12 W5 O2 78.9(9) . . ?
O15 W5 O2 60.5(8) . . ?
O16' W5 O2 110.8(8) . . ?
O4 W5 O2 51.3(8) . . ?
O22' W6 O13 112.8(12) 3_657 . ?
O22' W6 O19 101.1(13) 3_657 . ?
O13 W6 O19 109.3(9) . . ?
O22' W6 O12 63.7(14) 3_657 . ?
O13 W6 O12 110.5(9) . . ?
O19 W6 O12 140.2(11) . . ?
O22' W6 O20 144.2(13) 3_657 . ?
O13 W6 O20 102.4(8) . . ?
O19 W6 O20 71.9(11) . . ?
O12 W6 O20 98.8(11) . . ?
O22' W6 O19' 88.7(13) 3_657 . ?
O13 W6 O19' 90.5(8) . . ?
O19 W6 O19' 29.2(8) . . ?
O12 W6 O19' 149.9(11) . . ?
O20 W6 O19' 97.4(10) . . ?
O22' W6 O12' 92.1(13) 3_657 . ?
O13 W6 O12' 93.8(8) . . ?
O19 W6 O12' 145.9(11) . . ?
O12 W6 O12' 29.3(9) . . ?
O20 W6 O12' 79.1(9) . . ?
O19' W6 O12' 174.9(10) . . ?
O22' W6 O22 25.7(11) 3_657 3_657 ?
O13 W6 O22 90.6(8) . 3_657 ?
O19 W6 O22 97.6(10) . 3_657 ?
O12 W6 O22 82.7(11) . 3_657 ?
O20 W6 O22 165.4(8) . 3_657 ?
O19' W6 O22 75.4(10) . 3_657 ?
O12' W6 O22 107.1(10) . 3_657 ?
O22' W6 O3 48.8(11) 3_657 3_657 ?
O13 W6 O3 151.6(7) . 3_657 ?
O19 W6 O3 62.6(9) . 3_657 ?
O12 W6 O3 82.3(10) . 3_657 ?
O20 W6 O3 100.5(8) . 3_657 ?
O19' W6 O3 69.9(8) . 3_657 ?
O12' W6 O3 107.0(8) . 3_657 ?
O22 W6 O3 65.2(8) 3_657 3_657 ?
O22' W6 O4 86.0(13) 3_657 . ?
O13 W6 O4 153.9(7) . . ?
O19 W6 O4 83.1(10) . . ?
O12 W6 O4 60.4(10) . . ?
O20 W6 O4 58.6(9) . . ?
O19' W6 O4 108.6(9) . . ?
O12' W6 O4 66.5(8) . . ?
O22 W6 O4 111.0(9) 3_657 . ?
O3 W6 O4 54.5(7) 3_657 . ?
C2 C1 N1 117(3) . . ?
N2 C2 C1 128(3) . . ?
N2 C3 C5 122(2) . . ?
N2 C3 C4 116(2) . . ?
C5 C3 C4 122(2) . . ?
N1 C5 C3 121(2) . . ?
N1 C5 C6 115(3) . . ?
C3 C5 C6 124(3) . . ?
C7 C6 C5 111(3) . . ?
C10 C8 N3 123(2) . . ?
N3 C9 C11 120.0(19) . . ?
N3 C9 C13 113.9(19) . . ?
C11 C9 C13 126(2) . . ?
C8 C10 N4 121(2) . . ?
N4 C11 C9 122(2) . . ?
N4 C11 C12 118(2) . . ?
C9 C11 C12 120(2) . . ?
C9 C13 C14 108(2) . . ?
N5 C15 C16 120(2) . 3_767 ?
N5 C15 C17 119(3) . . ?
C16 C15 C17 120(3) 3_767 . ?
N5 C16 C15 122(2) . 3_767 ?
N5 C16 C19 116(3) . . ?
C15 C16 C19 121(3) 3_767 . ?
C18 C17 C15 131(5) . . ?
C5 N1 C1 117(2) . . ?
C5 N1 Cu1 125.7(18) . . ?
C1 N1 Cu1 117(2) . . ?
C3 N2 C2 115(2) . . ?
C3 N2 Cu2 129.9(17) . . ?
C2 N2 Cu2 115.0(16) . . ?
C8 N3 C9 116.1(17) . . ?
C8 N3 Cu2 122.2(16) . 2_547 ?
C9 N3 Cu2 120.5(14) . 2_547 ?
C11 N4 C10 118(2) . . ?
C11 N4 Cu2 120.3(16) . . ?
C10 N4 Cu2 121.2(15) . . ?
C16 N5 C15 118(2) . . ?
C16 N5 Cu1 121.0(18) . . ?
C15 N5 Cu1 120.2(17) . . ?
Si1 O1 O2 67.6(13) . . ?
Si1 O1 O4 64.2(12) . 3_657 ?
O2 O1 O4 108.8(17) . 3_657 ?
Si1 O1 O3 64.7(11) . 3_657 ?
O2 O1 O3 104.9(16) . 3_657 ?
O4 O1 O3 98.2(16) 3_657 3_657 ?
Si1 O1 W1 130.7(13) . . ?
O2 O1 W1 63.2(11) . . ?
O4 O1 W1 132.9(14) 3_657 . ?
O3 O1 W1 128.8(13) 3_657 . ?
Si1 O1 W3 123.3(12) . 3_657 ?
O2 O1 W3 132.6(14) . 3_657 ?
O4 O1 W3 59.1(10) 3_657 3_657 ?
O3 O1 W3 121.6(13) 3_657 3_657 ?
W1 O1 W3 91.3(7) . 3_657 ?
O1 O2 Si1 54.6(11) . . ?
O1 O2 W1 78.6(12) . . ?
Si1 O2 W1 133.2(11) . . ?
O1 O2 W5 138.8(14) . . ?
Si1 O2 W5 116.3(10) . . ?
W1 O2 W5 98.3(7) . . ?
O21' O3 Si1 131.3(14) . . ?
O21' O3 O1 115.5(16) . 3_657 ?
Si1 O3 O1 48.2(9) . 3_657 ?
O21' O3 O22' 99.5(17) . . ?
Si1 O3 O22' 127.6(16) . . ?
O1 O3 O22' 103.7(17) 3_657 . ?
O21' O3 W2 63.8(12) . . ?
Si1 O3 W2 127.6(12) . . ?
O1 O3 W2 79.4(11) 3_657 . ?
O22' O3 W2 58.5(12) . . ?

Si1 O3 W6 113.0(10) . 3_657 ?
O1 O3 W6 129.0(13) 3_657 3_657 ?

W2 O3 W6 100.6(8) . 3_657 ?

Si1 O3 W4 114.7(10) . . ?
O1 O3 W4 137.4(13) 3_657 . ?
O22' O3 W4 113.1(14) . . ?
W2 O3 W4 101.9(8) . . ?
W6 O3 W4 93.0(7) 3_657 . ?
O16 O4 Si1 136.7(18) . . ?
O16 O4 O1 116.1(18) . 3_657 ?
Si1 O4 O1 50.2(9) . 3_657 ?
O16 O4 W3 60.2(13) . . ?
Si1 O4 W3 128.9(12) . . ?
O1 O4 W3 78.7(12) 3_657 . ?
Si1 O4 W5 115.8(13) . . ?
O1 O4 W5 138.8(16) 3_657 . ?
W3 O4 W5 101.1(9) . . ?
O16 O4 W6 106.1(12) . . ?
Si1 O4 W6 112.7(12) . . ?
O1 O4 W6 127.6(16) 3_657 . ?
W3 O4 W6 98.1(9) . . ?
W5 O4 W6 93.5(7) . . ?
W1 O5 W4 132.4(12) . . ?
W1 O8 W2 139.3(7) . 3_657 ?
W3 O9 W2 136.3(8) . . ?
W3 O11 W1 138.5(8) . 3_657 ?
O12' O12 W6 90(2) . . ?
O12' O12 W5 72(2) . . ?
W6 O12 W5 136.9(15) . . ?
O12 O12' W5 78(2) . . ?
O12 O12' W6 60.5(19) . . ?
W5 O12' W6 123.2(12) . . ?
W5 O14 W4 137.0(10) . . ?
W1 O15 W5 132.1(11) . . ?
W6 O20 W3 138.9(13) . . ?
O1 Si1 O1 180.000(8) 3_657 . ?
O1 Si1 O2 57.8(12) 3_657 3_657 ?
O1 Si1 O2 122.2(12) . 3_657 ?
O1 Si1 O2 122.2(12) 3_657 . ?
O1 Si1 O2 57.8(12) . . ?
O2 Si1 O2 180.000(5) 3_657 . ?
O1 Si1 O4 65.5(12) 3_657 . ?
O1 Si1 O4 114.5(12) . . ?
O2 Si1 O4 103.4(11) 3_657 . ?
O2 Si1 O4 76.6(12) . . ?
O1 Si1 O4 114.5(12) 3_657 3_657 ?
O1 Si1 O4 65.5(12) . 3_657 ?
O2 Si1 O4 76.6(12) 3_657 3_657 ?
O2 Si1 O4 103.4(11) . 3_657 ?
O4 Si1 O4 180.000(5) . 3_657 ?
O1 Si1 O3 112.9(11) 3_657 3_657 ?
O1 Si1 O3 67.1(11) . 3_657 ?
O2 Si1 O3 79.3(10) 3_657 3_657 ?
O2 Si1 O3 100.7(10) . 3_657 ?
O4 Si1 O3 79.8(11) . 3_657 ?
O4 Si1 O3 100.2(11) 3_657 3_657 ?
O1 Si1 O3 67.1(11) 3_657 . ?
O1 Si1 O3 112.9(11) . . ?
O2 Si1 O3 100.7(10) 3_657 . ?
O2 Si1 O3 79.3(10) . . ?
O4 Si1 O3 100.2(11) . . ?
O4 Si1 O3 79.8(11) 3_657 . ?
O3 Si1 O3 180.0(14) 3_657 . ?
W5 O16 O4 93.8(18) . . ?
W5 O16 W3 161.7(17) . . ?
O4 O16 W3 73.0(14) . . ?
W6 O19 W4 135.3(14) . 3_657 ?
W2 O21 W4 116.4(14) . . ?
W2 O22 W6 116.9(12) . 3_657 ?
W3 O16' W5 114.0(13) . . ?
W4 O19' W6 120.2(13) 3_657 . ?
W4 O21' O3 98.4(17) . . ?
W4 O21' W2 160.0(14) . . ?
O3 O21' W2 70.6(12) . . ?
W6 O22' O3 86.8(16) 3_657 . ?
W6 O22' W2 148.6(18) 3_657 . ?
O3 O22' W2 69.4(11) . . ?
 
_diffrn_measured_fraction_theta_max    0.994
_diffrn_reflns_theta_full              25.35
_diffrn_measured_fraction_theta_full   0.994
_refine_diff_density_max    1.780
_refine_diff_density_min   -3.087
_refine_diff_density_rms    0.236

#===============================================================end

 
data_2
 
_audit_creation_method            SHELXL-97
_chemical_name_systematic
;
 ?
;
_chemical_name_common             ?
_chemical_melting_point           ?
_chemical_formula_moiety          'C24 H32 Cu4 N8 O40 Si W12'
_chemical_formula_sum
 'C24 H32 Cu4 N8 O40 Si W12'
_chemical_formula_weight          3561.03
 
loop_
 _atom_type_symbol
 _atom_type_description
 _atom_type_scat_dispersion_real
 _atom_type_scat_dispersion_imag
 _atom_type_scat_source
 'C'  'C'   0.0033   0.0016
 'International Tables Vol C Tables 4.2.6.8 and 6.1.1.4'
 'H'  'H'   0.0000   0.0000
 'International Tables Vol C Tables 4.2.6.8 and 6.1.1.4'
 'O'  'O'   0.0106   0.0060
 'International Tables Vol C Tables 4.2.6.8 and 6.1.1.4'
 'Si'  'Si'   0.0817   0.0704
 'International Tables Vol C Tables 4.2.6.8 and 6.1.1.4'
 'Cu'  'Cu'   0.3201   1.2651
 'International Tables Vol C Tables 4.2.6.8 and 6.1.1.4'
 'W'  'W'  -0.8490   6.8722
 'International Tables Vol C Tables 4.2.6.8 and 6.1.1.4'
 'N'  'N'   0.0061   0.0033
 'International Tables Vol C Tables 4.2.6.8 and 6.1.1.4'
 
_symmetry_cell_setting            orthorhombic
_symmetry_space_group_name_H-M     'P b c a'
_symmetry_space_group_name_hall   '-P 2ac 2ab'
 
loop_
 _symmetry_equiv_pos_as_xyz
 'x, y, z'
 '-x+1/2, -y, z+1/2'
 'x+1/2, -y+1/2, -z'
 '-x, y+1/2, -z+1/2'
 '-x, -y, -z'
 'x-1/2, y, -z-1/2'
 '-x-1/2, y-1/2, z'
 'x, -y-1/2, z-1/2'
 
_cell_length_a                    22.254(5)
_cell_length_b                    11.464(5)
_cell_length_c                    23.344(5)
_cell_angle_alpha                 90.000(5)
_cell_angle_beta                  90.000(5)
_cell_angle_gamma                 90.000(5)
_cell_volume                      5956(3)
_cell_formula_units_Z             4
_cell_measurement_temperature     293(2)
_cell_measurement_reflns_used     7839
_cell_measurement_theta_min       4.3
_cell_measurement_theta_max       29.8
 
_exptl_crystal_description        block
_exptl_crystal_colour             red
_exptl_crystal_size_max           0.12
_exptl_crystal_size_mid           0.10
_exptl_crystal_size_min           0.06
_exptl_crystal_density_meas       ?
_exptl_crystal_density_diffrn     3.972
_exptl_crystal_density_method     'not measured'
_exptl_crystal_F_000              6280
_exptl_absorpt_coefficient_mu     24.581
_exptl_absorpt_correction_type    multi-scan
_exptl_absorpt_correction_T_min   0.07
_exptl_absorpt_correction_T_max   0.18
_exptl_absorpt_process_details    
;
CrysAlis (Oxford Diffraction, 2006)
; 
_exptl_special_details
;
 ?
;
 
_diffrn_ambient_temperature       293(2)
_diffrn_radiation_wavelength      0.71073
_diffrn_radiation_type            MoK\a
_diffrn_radiation_source          'fine-focus sealed tube'
_diffrn_radiation_monochromator   graphite
_diffrn_measurement_device_type   'Oxford Diffraction Gemini R Ultra'
_diffrn_measurement_method        '\w scan'
_diffrn_detector_area_resol_mean   10.0
_diffrn_standards_number          ?
_diffrn_standards_interval_count  ?
_diffrn_standards_interval_time   ?
_diffrn_standards_decay_%         ?
_diffrn_reflns_number             37212
_diffrn_reflns_av_R_equivalents   0.1361
_diffrn_reflns_av_sigmaI/netI     0.1061
_diffrn_reflns_limit_h_min        -31
_diffrn_reflns_limit_h_max        22
_diffrn_reflns_limit_k_min        -14
_diffrn_reflns_limit_k_max        13
_diffrn_reflns_limit_l_min        -31
_diffrn_reflns_limit_l_max        32
_diffrn_reflns_theta_min          4.33
_diffrn_reflns_theta_max          29.81
_reflns_number_total              7839
_reflns_number_gt                 5086
_reflns_threshold_expression      >2sigma(I)
 
_computing_data_collection        'CrysAlis (Oxford Diffraction, 2006)'
_computing_cell_refinement        'CrysAlis'
_computing_data_reduction         'CrysAlis'
_computing_structure_solution     'SHELXS-97 (Sheldrick, 1997)'
_computing_structure_refinement   'SHELXL-97 (Sheldrick, 1997)'
_computing_molecular_graphics     ?
_computing_publication_material   ?
 
_refine_special_details
;
 Refinement of F^2^ against ALL reflections.  The weighted R-factor wR and
 goodness of fit S are based on F^2^, conventional R-factors R are based
 on F, with F set to zero for negative F^2^. The threshold expression of
 F^2^ > 2sigma(F^2^) is used only for calculating R-factors(gt) etc. and is
 not relevant to the choice of reflections for refinement.  R-factors based
 on F^2^ are statistically about twice as large as those based on F, and R-
 factors based on ALL data will be even larger.
;
 
_refine_ls_structure_factor_coef  Fsqd
_refine_ls_matrix_type            full
_refine_ls_weighting_scheme       calc
_refine_ls_weighting_details
 'calc w=1/[\s^2^(Fo^2^)+(0.1086P)^2^+0.0000P] where P=(Fo^2^+2Fc^2^)/3'
_atom_sites_solution_primary      direct
_atom_sites_solution_secondary    difmap
_atom_sites_solution_hydrogens    geom
_refine_ls_hydrogen_treatment     constr
_refine_ls_extinction_method      none
_refine_ls_extinction_coef        ?
_refine_ls_number_reflns          7839
_refine_ls_number_parameters      401
_refine_ls_number_restraints      12
_refine_ls_R_factor_all           0.1174
_refine_ls_R_factor_gt            0.0694
_refine_ls_wR_factor_ref          0.1838
_refine_ls_wR_factor_gt           0.1658
_refine_ls_goodness_of_fit_ref    0.997
_refine_ls_restrained_S_all       0.998
_refine_ls_shift/su_max           0.000
_refine_ls_shift/su_mean          0.000
 
loop_
 _atom_site_label
 _atom_site_type_symbol
 _atom_site_fract_x
 _atom_site_fract_y
 _atom_site_fract_z
 _atom_site_U_iso_or_equiv
 _atom_site_adp_type
 _atom_site_occupancy
 _atom_site_symmetry_multiplicity
 _atom_site_calc_flag
 _atom_site_refinement_flags
 _atom_site_disorder_assembly
 _atom_site_disorder_group
Cu1 Cu -0.19450(13) -0.0001(2) 0.46819(10) 0.0349(6) Uani 1 1 d . . .
Cu2 Cu -0.1411(2) 0.2848(3) 0.22680(14) 0.0788(13) Uani 1 1 d . . .
C1 C -0.0918(14) 0.516(2) 0.1760(11) 0.061(7) Uani 1 1 d . . .
H1A H -0.0854 0.4680 0.2093 0.091 Uiso 1 1 calc R . .
H1B H -0.1090 0.5888 0.1873 0.091 Uiso 1 1 calc R . .
H1C H -0.0541 0.5291 0.1571 0.091 Uiso 1 1 calc R . .
C2 C -0.1339(10) 0.4541(17) 0.1355(9) 0.036(5) Uani 1 1 d . . .
C3 C -0.2029(10) 0.3073(17) 0.1201(9) 0.037(5) Uani 1 1 d . . .
C4 C -0.2359(13) 0.205(2) 0.1428(15) 0.071(9) Uani 1 1 d . . .
H4A H -0.2565 0.1664 0.1120 0.106 Uiso 1 1 calc R . .
H4B H -0.2646 0.2303 0.1709 0.106 Uiso 1 1 calc R . .
H4C H -0.2080 0.1517 0.1602 0.106 Uiso 1 1 calc R . .
C5 C -0.2132(9) 0.3513(18) 0.0662(11) 0.043(6) Uani 1 1 d . . .
H5 H -0.2415 0.3150 0.0428 0.051 Uiso 1 1 calc R . .
C6 C -0.1434(9) 0.4988(16) 0.0825(7) 0.027(4) Uani 1 1 d U . .
H6 H -0.1228 0.5651 0.0705 0.032 Uiso 1 1 calc R . .
C7 C -0.0732(13) 0.064(3) 0.2731(10) 0.063(8) Uani 1 1 d . . .
H7A H -0.0777 0.0951 0.2351 0.095 Uiso 1 1 calc R . .
H7B H -0.0713 -0.0192 0.2715 0.095 Uiso 1 1 calc R . .
H7C H -0.0368 0.0941 0.2898 0.095 Uiso 1 1 calc R . .
C8 C -0.1249(9) 0.1001(18) 0.3084(10) 0.036(5) Uani 1 1 d . . .
C9 C -0.2064(11) 0.2191(18) 0.3277(8) 0.038(5) Uani 1 1 d . . .
C10 C -0.2445(15) 0.325(2) 0.3113(12) 0.065(8) Uani 1 1 d . . .
H10A H -0.2758 0.3357 0.3391 0.098 Uiso 1 1 calc R . .
H10B H -0.2621 0.3127 0.2742 0.098 Uiso 1 1 calc R . .
H10C H -0.2196 0.3934 0.3102 0.098 Uiso 1 1 calc R . .
C11 C -0.2176(10) 0.1641(18) 0.3751(10) 0.039(5) Uani 1 1 d . . .
H11 H -0.2485 0.1904 0.3987 0.047 Uiso 1 1 calc R . .
C12 C -0.1381(8) 0.0375(14) 0.3592(7) 0.023(4) Uani 1 1 d . . .
H12 H -0.1139 -0.0249 0.3700 0.027 Uiso 1 1 calc R . .
O1 O -0.0558(9) 0.1428(13) -0.2049(7) 0.057(5) Uani 1 1 d . . .
O2 O -0.0622(7) 0.4346(11) -0.0309(7) 0.044(4) Uani 1 1 d . . .
O3 O -0.0474(7) 0.283(2) 0.0584(7) 0.067(6) Uani 1 1 d . . .
O4 O -0.0837(7) 0.1074(13) 0.1242(9) 0.065(6) Uani 1 1 d . . .
O5 O 0.0413(7) 0.3066(19) -0.0169(7) 0.066(6) Uani 1 1 d . . .
O6 O -0.0299(7) -0.0598(14) -0.1506(11) 0.075(7) Uani 1 1 d . . .
O7 O -0.0186(9) 0.2759(16) 0.1755(8) 0.067(6) Uani 1 1 d . . .
O8 O 0.0637(10) 0.2349(18) 0.0893(9) 0.075(6) Uiso 1 1 d . . .
O9 O 0.1387(12) 0.190(2) -0.0596(11) 0.024(5) Uiso 0.50 1 d P . .
O9' O 0.1085(11) 0.159(2) -0.0541(10) 0.019(5) Uiso 0.50 1 d P . .
O10 O 0.0487(7) 0.1094(13) -0.1424(10) 0.064(6) Uani 1 1 d . . .
O11 O 0.0070(10) 0.1330(17) 0.0228(9) 0.016(5) Uani 0.50 1 d P . .
O12 O 0.1121(8) -0.0762(16) 0.1083(8) 0.060(5) Uani 1 1 d U . .
O13 O 0.1551(8) 0.3309(14) 0.0268(6) 0.052(5) Uani 1 1 d . . .
O14 O 0.1683(7) 0.0637(13) -0.1518(7) 0.044(4) Uani 1 1 d . . .
O15 O -0.0176(10) 0.0120(17) 0.0661(9) 0.014(4) Uiso 0.50 1 d P . .
O16 O 0.1661(12) 0.109(2) 0.0418(10) 0.024(5) Uiso 0.50 1 d P . .
O16' O 0.1324(14) 0.084(2) 0.0464(12) 0.033(6) Uiso 0.50 1 d P . .
O17 O 0.1404(12) -0.0525(19) -0.0413(10) 0.020(5) Uiso 0.50 1 d P . .
O17' O 0.1734(11) -0.0309(18) -0.0478(10) 0.016(5) Uiso 0.50 1 d P . .
O18' O -0.0290(11) 0.222(2) -0.0884(10) 0.017(5) Uiso 0.50 1 d P . .
O18 O -0.0409(11) 0.264(2) -0.1074(11) 0.019(5) Uiso 0.50 1 d P . .
O19 O 0.1185(8) -0.217(2) 0.0207(8) 0.086(8) Uani 1 1 d . . .
O20 O 0.2210(5) -0.0985(12) 0.0487(6) 0.035(3) Uani 1 1 d . . .
O21 O 0.0414(10) -0.0919(18) 0.0349(10) 0.017(5) Uiso 0.50 1 d P . .
O22 O -0.0725(10) -0.0409(16) 0.0102(9) 0.012(4) Uani 0.50 1 d P . .
Si1 Si 0.0000 0.0000 0.0000 0.0086(11) Uiso 1 2 d S . .
W1 W -0.01370(4) 0.19009(6) 0.11747(3) 0.02377(19) Uani 1 1 d . . .
W2 W -0.04180(3) 0.29452(5) -0.02226(3) 0.02129(18) Uani 1 1 d . . .
W3 W -0.03708(3) 0.09831(7) -0.13891(3) 0.02377(19) Uani 1 1 d . . .
W4 W 0.10535(4) 0.22394(6) 0.01995(3) 0.0278(2) Uani 1 1 d . . .
W5 W 0.11445(4) 0.04540(7) -0.10263(3) 0.0308(2) Uani 1 1 d . . .
W6 W 0.14920(3) -0.07023(7) 0.03335(3) 0.0289(2) Uani 1 1 d . . .
N1 N -0.1599(9) 0.3598(16) 0.1555(8) 0.044(5) Uani 1 1 d . . .
N2 N -0.1840(7) 0.4444(12) 0.0465(6) 0.025(3) Uani 1 1 d . . .
N3 N -0.1596(9) 0.1891(14) 0.2925(7) 0.041(5) Uani 1 1 d . . .
N4 N -0.1848(7) 0.0675(14) 0.3915(6) 0.027(3) Uani 1 1 d . . .
 
loop_
 _atom_site_aniso_label
 _atom_site_aniso_U_11
 _atom_site_aniso_U_22
 _atom_site_aniso_U_33
 _atom_site_aniso_U_23
 _atom_site_aniso_U_13
 _atom_site_aniso_U_12
Cu1 0.0454(16) 0.0445(14) 0.0149(11) 0.0034(10) -0.0007(11) -0.0012(12)
Cu2 0.146(4) 0.065(2) 0.0257(16) 0.0260(15) 0.015(2) 0.021(2)
C1 0.08(2) 0.060(16) 0.039(14) 0.020(12) -0.023(14) 0.012(14)
C2 0.047(13) 0.031(10) 0.030(11) 0.009(8) -0.012(10) -0.003(9)
C3 0.039(13) 0.033(10) 0.040(13) 0.018(9) 0.030(10) 0.006(9)
C4 0.059(18) 0.043(14) 0.11(3) 0.029(15) 0.032(17) -0.010(12)
C5 0.020(10) 0.032(10) 0.077(18) 0.012(11) 0.026(10) 0.012(8)
C6 0.032(8) 0.033(7) 0.016(7) 0.006(6) -0.002(6) 0.000(6)
C7 0.062(18) 0.10(2) 0.026(13) 0.021(13) 0.006(12) 0.011(16)
C8 0.030(11) 0.034(11) 0.045(13) 0.006(9) -0.012(10) -0.020(9)
C9 0.056(14) 0.044(12) 0.014(9) 0.006(8) -0.016(9) 0.007(10)
C10 0.09(2) 0.063(17) 0.046(16) 0.023(13) -0.010(15) 0.026(15)
C11 0.041(13) 0.038(11) 0.040(13) -0.013(9) 0.006(10) 0.009(9)
C12 0.030(10) 0.019(8) 0.020(9) 0.003(7) 0.008(8) 0.000(7)
O1 0.099(15) 0.041(9) 0.032(9) 0.012(7) -0.011(9) -0.007(9)
O2 0.035(9) 0.027(7) 0.070(11) 0.009(7) 0.010(8) 0.014(6)
O3 0.021(8) 0.150(18) 0.030(9) 0.043(10) -0.004(7) 0.013(9)
O4 0.030(9) 0.038(9) 0.126(18) 0.032(10) -0.011(10) 0.007(7)
O5 0.020(8) 0.145(18) 0.032(9) 0.049(10) 0.000(6) -0.006(9)
O6 0.014(8) 0.044(10) 0.17(2) 0.026(11) -0.013(10) -0.002(7)
O7 0.073(13) 0.081(12) 0.048(11) -0.053(9) -0.031(9) 0.035(10)
O10 0.016(8) 0.030(8) 0.147(19) 0.009(9) -0.002(9) -0.005(6)
O11 0.013(11) 0.017(10) 0.017(12) -0.004(9) 0.003(9) 0.002(8)
O12 0.047(8) 0.070(8) 0.062(8) -0.028(7) 0.030(6) -0.027(6)
O13 0.071(12) 0.057(9) 0.030(8) 0.024(7) -0.026(8) -0.033(8)
O14 0.037(9) 0.056(9) 0.040(9) 0.011(7) 0.019(7) 0.011(7)
O19 0.047(11) 0.137(18) 0.074(13) -0.080(13) 0.045(10) -0.068(12)
O20 0.007(6) 0.049(8) 0.049(9) -0.006(7) 0.010(6) 0.006(6)
O22 0.018(12) 0.007(9) 0.013(11) -0.001(8) -0.012(9) -0.001(8)
W1 0.0301(4) 0.0269(4) 0.0143(4) -0.0077(3) 0.0011(3) 0.0034(3)
W2 0.0197(4) 0.0159(3) 0.0282(4) 0.0010(3) 0.0015(3) 0.0018(3)
W3 0.0234(4) 0.0393(4) 0.0085(3) 0.0062(3) -0.0015(3) -0.0017(3)
W4 0.0359(5) 0.0210(4) 0.0265(4) 0.0041(3) -0.0123(3) -0.0097(3)
W5 0.0355(5) 0.0383(4) 0.0186(4) 0.0091(3) 0.0150(3) 0.0102(3)
W6 0.0207(4) 0.0413(4) 0.0248(4) -0.0098(3) -0.0083(3) 0.0131(3)
N1 0.050(13) 0.042(10) 0.039(11) 0.010(8) 0.014(9) 0.012(9)
N2 0.028(9) 0.029(8) 0.018(8) 0.005(6) 0.005(6) 0.003(6)
N3 0.066(14) 0.031(9) 0.026(9) 0.013(7) -0.003(9) 0.000(8)
N4 0.028(9) 0.043(9) 0.011(7) 0.002(6) -0.003(6) -0.010(7)
 
_geom_special_details
;
 All esds (except the esd in the dihedral angle between two l.s. planes)
 are estimated using the full covariance matrix.  The cell esds are taken
 into account individually in the estimation of esds in distances, angles
 and torsion angles; correlations between esds in cell parameters are only
 used when they are defined by crystal symmetry.  An approximate (isotropic)
 treatment of cell esds is used for estimating esds involving l.s. planes.
;
 
loop_
 _geom_bond_atom_site_label_1
 _geom_bond_atom_site_label_2
 _geom_bond_distance
 _geom_bond_site_symmetry_2
 _geom_bond_publ_flag
Cu1 N2 1.950(15) 8_566 ?
Cu1 N4 1.963(14) . ?
Cu1 O13 2.130(15) 4_545 ?
Cu1 O20 2.228(13) 6_556 ?
Cu2 N1 1.919(19) . ?
Cu2 N3 1.930(16) . ?
C1 C2 1.51(3) . ?
C2 N1 1.31(3) . ?
C2 C6 1.36(3) . ?
C3 C5 1.38(3) . ?
C3 N1 1.40(3) . ?
C3 C4 1.48(3) . ?
C5 N2 1.33(2) . ?
C6 N2 1.38(2) . ?
C7 C8 1.47(3) . ?
C8 N3 1.33(3) . ?
C8 C12 1.42(3) . ?
C9 C11 1.30(3) . ?
C9 N3 1.37(3) . ?
C9 C10 1.53(3) . ?
C11 N4 1.38(3) . ?
C12 N4 1.33(2) . ?
O1 W3 1.675(15) . ?
O2 W2 1.681(13) . ?
O3 W2 1.891(16) . ?
O3 W1 1.896(15) . ?
O4 W1 1.831(16) . ?
O4 W5 1.947(17) 5 ?
O5 W2 1.860(15) . ?
O5 W4 1.915(16) . ?
O6 W3 1.840(17) . ?
O6 W1 1.943(16) 5 ?
O7 W1 1.677(14) . ?
O8 W4 1.87(2) . ?
O8 W1 1.91(2) . ?
O9 O9' 0.77(3) . ?
O9 W5 2.01(2) . ?
O9 W4 2.04(3) . ?
O9' W5 1.74(2) . ?
O9' W4 1.88(2) . ?
O10 W5 1.881(17) . ?
O10 W3 1.915(15) . ?
O11 Si1 1.62(2) . ?
O11 O21 1.79(3) 5 ?
O11 O15 1.80(3) . ?
O11 W1 2.35(2) . ?
O11 W2 2.39(2) . ?
O11 W4 2.42(2) . ?
O12 W3 1.835(15) 5 ?
O12 W6 1.935(17) . ?
O13 W4 1.659(15) . ?
O13 Cu1 2.130(15) 4 ?
O14 W5 1.673(14) . ?
O15 Si1 1.60(2) . ?
O15 W1 2.37(2) . ?
O15 W5 2.41(2) 5 ?
O15 W3 2.44(2) 5 ?
O16 O16' 0.81(3) . ?
O16 W4 1.95(2) . ?
O16 W6 2.10(2) . ?
O16' W4 1.82(3) . ?
O16' W6 1.83(3) . ?
O17 O17' 0.79(3) . ?
O17 W6 1.77(2) . ?
O17 W5 1.91(2) . ?
O17' W6 2.02(2) . ?
O17' W5 2.03(2) . ?
O18' O18 0.71(3) . ?
O18' W2 1.78(2) . ?
O18' W3 1.85(2) . ?
O18 W2 2.02(2) . ?
O18 W3 2.04(2) . ?
O19 W6 1.842(18) . ?
O19 W2 1.923(14) 5 ?
O20 W6 1.669(13) . ?
O20 Cu1 2.228(13) 6_656 ?
O21 Si1 1.62(2) . ?
O21 O11 1.79(3) 5 ?
O21 W2 2.34(2) 5 ?
O21 W6 2.41(2) . ?
O21 W3 2.43(2) 5 ?
O22 Si1 1.70(2) . ?
O22 W4 2.331(18) 5 ?
O22 W5 2.35(2) 5 ?
O22 W6 2.36(2) 5 ?
Si1 O15 1.60(2) 5 ?
Si1 O21 1.62(2) 5 ?
Si1 O11 1.62(2) 5 ?
Si1 O22 1.70(2) 5 ?
W1 O6 1.943(16) 5 ?
W2 O19 1.923(14) 5 ?
W2 O21 2.34(2) 5 ?
W3 O12 1.835(15) 5 ?
W3 O21 2.43(2) 5 ?
W3 O15 2.44(2) 5 ?
W4 O22 2.331(18) 5 ?
W5 O4 1.947(17) 5 ?
W5 O22 2.35(2) 5 ?
W5 O15 2.41(2) 5 ?
W6 O22 2.36(2) 5 ?
N2 Cu1 1.950(15) 8_565 ?
 
loop_
 _geom_angle_atom_site_label_1
 _geom_angle_atom_site_label_2
 _geom_angle_atom_site_label_3
 _geom_angle
 _geom_angle_site_symmetry_1
 _geom_angle_site_symmetry_3
 _geom_angle_publ_flag
N2 Cu1 N4 135.4(6) 8_566 . ?
N2 Cu1 O13 101.4(6) 8_566 4_545 ?
N4 Cu1 O13 111.3(7) . 4_545 ?
N2 Cu1 O20 115.7(6) 8_566 6_556 ?
N4 Cu1 O20 97.6(6) . 6_556 ?
O13 Cu1 O20 84.1(6) 4_545 6_556 ?
N1 Cu2 N3 153.8(9) . . ?
N1 C2 C6 125(2) . . ?
N1 C2 C1 115.9(19) . . ?
C6 C2 C1 119.5(19) . . ?
C5 C3 N1 119.9(18) . . ?
C5 C3 C4 122(2) . . ?
N1 C3 C4 118(2) . . ?
N2 C5 C3 122(2) . . ?
C2 C6 N2 119.0(17) . . ?
N3 C8 C12 120(2) . . ?
N3 C8 C7 121(2) . . ?
C12 C8 C7 119.3(19) . . ?
C11 C9 N3 122.3(19) . . ?
C11 C9 C10 119(2) . . ?
N3 C9 C10 118.1(19) . . ?
C9 C11 N4 122(2) . . ?
N4 C12 C8 120.4(17) . . ?
W2 O3 W1 137.6(11) . . ?
W1 O4 W5 138.0(11) . 5 ?
W2 O5 W4 137.2(10) . . ?
W3 O6 W1 137.8(12) . 5 ?
W4 O8 W1 136.5(12) . . ?
O9' O9 W5 58(2) . . ?
O9' O9 W4 67(3) . . ?
W5 O9 W4 120.9(13) . . ?
O9 O9' W5 100(3) . . ?
O9 O9' W4 90(3) . . ?
W5 O9' W4 154.0(14) . . ?
W5 O10 W3 136.8(11) . . ?
Si1 O11 O21 56.4(9) . 5 ?
Si1 O11 O15 55.3(9) . . ?
O21 O11 O15 92.1(14) 5 . ?
Si1 O11 W1 123.4(11) . . ?
O21 O11 W1 131.6(13) 5 . ?
O15 O11 W1 68.1(10) . . ?
Si1 O11 W2 122.6(12) . . ?
O21 O11 W2 66.3(10) 5 . ?
O15 O11 W2 134.8(13) . . ?
W1 O11 W2 96.3(7) . . ?
Si1 O11 W4 118.8(11) . . ?
O21 O11 W4 129.5(13) 5 . ?
O15 O11 W4 128.4(13) . . ?
W1 O11 W4 94.8(8) . . ?
W2 O11 W4 93.7(7) . . ?
W3 O12 W6 138.2(11) 5 . ?
W4 O13 Cu1 162.2(12) . 4 ?
Si1 O15 O11 56.6(9) . . ?
Si1 O15 W1 123.6(11) . . ?
O11 O15 W1 67.0(9) . . ?
Si1 O15 W5 122.5(11) . 5 ?
O11 O15 W5 132.9(13) . 5 ?
W1 O15 W5 95.1(7) . 5 ?
Si1 O15 W3 120.4(11) . 5 ?
O11 O15 W3 129.6(13) . 5 ?
W1 O15 W3 94.3(7) . 5 ?
W5 O15 W3 93.3(7) 5 5 ?
O16' O16 W4 69(3) . . ?
O16' O16 W6 60(3) . . ?
W4 O16 W6 120.8(13) . . ?
O16 O16' W4 87(3) . . ?
O16 O16' W6 98(3) . . ?
W4 O16' W6 149.4(17) . . ?
O17' O17 W6 97(3) . . ?
O17' O17 W5 87(3) . . ?
W6 O17 W5 147.3(13) . . ?
O17 O17' W6 60(2) . . ?
O17 O17' W5 70(2) . . ?
W6 O17' W5 121.0(12) . . ?
O18 O18' W2 99(3) . . ?
O18 O18' W3 95(3) . . ?
W2 O18' W3 153.8(14) . . ?
O18' O18 W2 61(3) . . ?
O18' O18 W3 64(3) . . ?
W2 O18 W3 121.0(13) . . ?
W6 O19 W2 138.5(12) . 5 ?
W6 O20 Cu1 132.2(8) . 6_656 ?
Si1 O21 O11 56.6(10) . 5 ?
Si1 O21 W2 125.7(12) . 5 ?
O11 O21 W2 69.3(9) 5 5 ?
Si1 O21 W6 119.4(11) . . ?
O11 O21 W6 127.9(13) 5 . ?
W2 O21 W6 95.5(8) 5 . ?
Si1 O21 W3 120.0(11) . 5 ?
O11 O21 W3 136.1(13) 5 5 ?
W2 O21 W3 95.6(8) 5 5 ?
W6 O21 W3 93.3(8) . 5 ?
Si1 O22 W4 120.2(10) . 5 ?
Si1 O22 W5 120.8(10) . 5 ?
W4 O22 W5 97.7(8) 5 5 ?
Si1 O22 W6 118.5(10) . 5 ?
W4 O22 W6 97.4(7) 5 5 ?
W5 O22 W6 96.9(8) 5 5 ?
O15 Si1 O15 180.0(15) 5 . ?
O15 Si1 O21 73.1(11) 5 5 ?
O15 Si1 O21 106.9(11) . 5 ?
O15 Si1 O21 106.9(11) 5 . ?
O15 Si1 O21 73.1(11) . . ?
O21 Si1 O21 180(2) 5 . ?
O15 Si1 O11 68.0(10) 5 5 ?
O15 Si1 O11 112.0(10) . 5 ?
O21 Si1 O11 113.0(11) 5 5 ?
O21 Si1 O11 67.0(11) . 5 ?
O15 Si1 O11 112.0(10) 5 . ?
O15 Si1 O11 68.0(10) . . ?
O21 Si1 O11 67.0(11) 5 . ?
O21 Si1 O11 113.0(11) . . ?
O11 Si1 O11 180.0(14) 5 . ?
O15 Si1 O22 69.8(10) 5 5 ?
O15 Si1 O22 110.2(10) . 5 ?
O21 Si1 O22 106.9(10) 5 5 ?
O21 Si1 O22 73.1(10) . 5 ?
O11 Si1 O22 107.8(10) 5 5 ?
O11 Si1 O22 72.2(10) . 5 ?
O15 Si1 O22 110.2(10) 5 . ?
O15 Si1 O22 69.8(10) . . ?
O21 Si1 O22 73.1(10) 5 . ?
O21 Si1 O22 106.9(10) . . ?
O11 Si1 O22 72.2(10) 5 . ?
O11 Si1 O22 107.8(10) . . ?
O22 Si1 O22 180.0(19) 5 . ?
O7 W1 O4 100.3(10) . . ?
O7 W1 O3 103.5(10) . . ?
O4 W1 O3 90.9(8) . . ?
O7 W1 O8 100.3(10) . . ?
O4 W1 O8 159.1(9) . . ?
O3 W1 O8 87.5(8) . . ?
O7 W1 O6 99.3(10) . 5 ?
O4 W1 O6 89.6(7) . 5 ?
O3 W1 O6 156.7(10) . 5 ?
O8 W1 O6 83.9(8) . 5 ?
O7 W1 O11 159.2(9) . . ?
O4 W1 O11 95.9(9) . . ?
O3 W1 O11 63.2(8) . . ?
O8 W1 O11 64.9(8) . . ?
O6 W1 O11 93.6(9) 5 . ?
O7 W1 O15 155.7(9) . . ?
O4 W1 O15 64.3(8) . . ?
O3 W1 O15 95.7(9) . . ?
O8 W1 O15 95.2(8) . . ?
O6 W1 O15 63.7(9) 5 . ?
O11 W1 O15 44.9(7) . . ?
O2 W2 O18' 112.9(10) . . ?
O2 W2 O5 101.9(9) . . ?
O18' W2 O5 86.2(10) . . ?
O2 W2 O3 99.8(9) . . ?
O18' W2 O3 147.2(10) . . ?
O5 W2 O3 90.3(7) . . ?
O2 W2 O19 101.8(9) . 5 ?
O18' W2 O19 86.7(9) . 5 ?
O5 W2 O19 156.3(10) . 5 ?
O3 W2 O19 83.6(8) . 5 ?
O2 W2 O18 92.8(9) . . ?
O18' W2 O18 20.4(8) . . ?
O5 W2 O18 93.9(8) . . ?
O3 W2 O18 165.6(10) . . ?
O19 W2 O18 87.0(8) 5 . ?
O2 W2 O21 159.0(8) . 5 ?
O18' W2 O21 54.8(10) . 5 ?
O5 W2 O21 94.5(9) . 5 ?
O3 W2 O21 93.2(9) . 5 ?
O19 W2 O21 63.1(9) 5 5 ?
O18 W2 O21 72.8(9) . 5 ?
O2 W2 O11 156.2(8) . . ?
O18' W2 O11 86.8(10) . . ?
O5 W2 O11 64.9(8) . . ?
O3 W2 O11 62.4(8) . . ?
O19 W2 O11 92.2(10) 5 . ?
O18 W2 O11 107.2(9) . . ?
O21 W2 O11 44.4(7) 5 . ?
O1 W3 O12 100.0(10) . 5 ?
O1 W3 O6 100.6(9) . . ?
O12 W3 O6 90.1(8) 5 . ?
O1 W3 O18' 112.2(10) . . ?
O12 W3 O18' 86.9(9) 5 . ?
O6 W3 O18' 147.1(11) . . ?
O1 W3 O10 100.9(10) . . ?
O12 W3 O10 158.9(9) 5 . ?
O6 W3 O10 88.4(7) . . ?
O18' W3 O10 83.0(9) . . ?
O1 W3 O18 92.1(9) . . ?
O12 W3 O18 87.2(9) 5 . ?
O6 W3 O18 167.2(11) . . ?
O18' W3 O18 20.3(8) . . ?
O10 W3 O18 89.7(8) . . ?
O1 W3 O21 156.6(8) . 5 ?
O12 W3 O21 64.5(8) 5 5 ?
O6 W3 O21 97.0(9) . 5 ?
O18' W3 O21 52.4(9) . 5 ?
O10 W3 O21 94.8(9) . 5 ?
O18 W3 O21 70.5(9) . 5 ?
O1 W3 O15 157.1(8) . 5 ?
O12 W3 O15 96.3(8) 5 5 ?
O6 W3 O15 63.3(8) . 5 ?
O18' W3 O15 84.4(9) . 5 ?
O10 W3 O15 64.4(8) . 5 ?
O18 W3 O15 104.6(9) . 5 ?
O21 W3 O15 46.3(7) 5 5 ?
O13 W4 O16' 113.5(11) . . ?
O13 W4 O8 101.4(9) . . ?
O16' W4 O8 86.0(11) . . ?
O13 W4 O9' 110.8(10) . . ?
O16' W4 O9' 87.3(11) . . ?
O8 W4 O9' 147.2(10) . . ?
O13 W4 O5 100.0(9) . . ?
O16' W4 O5 146.5(11) . . ?
O8 W4 O5 89.3(8) . . ?
O9' W4 O5 79.0(9) . . ?
O13 W4 O16 90.7(10) . . ?
O16' W4 O16 24.4(10) . . ?
O8 W4 O16 99.3(10) . . ?
O9' W4 O16 87.1(10) . . ?
O5 W4 O16 164.8(10) . . ?
O13 W4 O9 89.2(10) . . ?
O16' W4 O9 91.2(11) . . ?
O8 W4 O9 169.3(10) . . ?
O9' W4 O9 22.2(8) . . ?
O5 W4 O9 87.4(9) . . ?
O16 W4 O9 81.9(10) . . ?
O13 W4 O22 154.6(9) . 5 ?
O16' W4 O22 54.0(10) . 5 ?
O8 W4 O22 99.6(8) . 5 ?
O9' W4 O22 51.7(9) . 5 ?
O5 W4 O22 94.4(8) . 5 ?
O16 W4 O22 71.9(9) . 5 ?
O9 W4 O22 70.6(9) . 5 ?
O13 W4 O11 156.5(9) . . ?
O16' W4 O11 84.8(11) . . ?
O8 W4 O11 63.8(8) . . ?
O9' W4 O11 83.7(9) . . ?
O5 W4 O11 63.5(7) . . ?
O16 W4 O11 109.1(9) . . ?
O9 W4 O11 105.8(9) . . ?
O22 W4 O11 48.6(7) 5 . ?
O14 W5 O9' 114.1(10) . . ?
O14 W5 O10 99.8(8) . . ?
O9' W5 O10 88.2(10) . . ?
O14 W5 O17 111.8(9) . . ?
O9' W5 O17 88.6(10) . . ?
O10 W5 O17 146.6(10) . . ?
O14 W5 O4 100.8(8) . 5 ?
O9' W5 O4 145.1(10) . 5 ?
O10 W5 O4 87.1(7) . 5 ?
O17 W5 O4 76.8(9) . 5 ?
O14 W5 O9 92.7(10) . . ?
O9' W5 O9 22.1(9) . . ?
O10 W5 O9 97.6(9) . . ?
O17 W5 O9 91.7(10) . . ?
O4 W5 O9 164.7(10) 5 . ?
O14 W5 O17' 91.4(9) . . ?
O9' W5 O17' 87.9(10) . . ?
O10 W5 O17' 168.8(9) . . ?
O17 W5 O17' 22.8(8) . . ?
O4 W5 O17' 90.1(8) 5 . ?
O9 W5 O17' 82.4(9) . . ?
O14 W5 O22 156.5(8) . 5 ?
O9' W5 O22 52.2(9) . 5 ?
O10 W5 O22 98.8(8) . 5 ?
O17 W5 O22 54.5(9) . 5 ?
O4 W5 O22 94.5(8) 5 5 ?
O9 W5 O22 70.5(9) . 5 ?
O17' W5 O22 70.7(8) . 5 ?
O14 W5 O15 156.6(8) . 5 ?
O9' W5 O15 84.6(10) . 5 ?
O10 W5 O15 65.5(7) . 5 ?
O17 W5 O15 81.1(9) . 5 ?
O4 W5 O15 62.1(7) 5 5 ?
O9 W5 O15 106.7(9) . 5 ?
O17' W5 O15 103.7(8) . 5 ?
O22 W5 O15 46.7(7) 5 5 ?
O20 W6 O17 109.9(10) . . ?
O20 W6 O16' 110.3(11) . . ?
O17 W6 O16' 91.8(12) . . ?
O20 W6 O19 102.2(9) . . ?
O17 W6 O19 84.6(10) . . ?
O16' W6 O19 146.4(12) . . ?
O20 W6 O12 102.0(8) . . ?
O17 W6 O12 148.1(10) . . ?
O16' W6 O12 78.3(11) . . ?
O19 W6 O12 87.4(7) . . ?
O20 W6 O17' 89.4(8) . . ?
O17 W6 O17' 22.8(9) . . ?
O16' W6 O17' 89.7(11) . . ?
O19 W6 O17' 98.8(9) . . ?
O12 W6 O17' 165.7(9) . . ?
O20 W6 O16 90.0(9) . . ?
O17 W6 O16 90.0(10) . . ?
O16' W6 O16 22.5(10) . . ?
O19 W6 O16 167.7(11) . . ?
O12 W6 O16 91.5(9) . . ?
O17' W6 O16 79.8(9) . . ?
O20 W6 O22 152.8(7) . 5 ?
O17 W6 O22 55.4(9) . 5 ?
O16' W6 O22 53.4(10) . 5 ?
O19 W6 O22 99.0(9) . 5 ?
O12 W6 O22 95.8(8) . 5 ?
O17' W6 O22 70.6(8) . 5 ?
O16 W6 O22 69.0(8) . 5 ?
O20 W6 O21 158.2(7) . . ?
O17 W6 O21 85.3(10) . . ?
O16' W6 O21 83.9(11) . . ?
O19 W6 O21 62.5(8) . . ?
O12 W6 O21 63.8(8) . . ?
O17' W6 O21 107.6(9) . . ?
O16 W6 O21 106.1(9) . . ?
O22 W6 O21 49.0(7) 5 . ?
C2 N1 C3 116.4(18) . . ?
C2 N1 Cu2 125.5(17) . . ?
C3 N1 Cu2 118.0(14) . . ?
C5 N2 C6 118.1(18) . . ?
C5 N2 Cu1 121.8(16) . 8_565 ?
C6 N2 Cu1 120.0(12) . 8_565 ?
C8 N3 C9 117.8(17) . . ?
C8 N3 Cu2 122.2(16) . . ?
C9 N3 Cu2 119.7(13) . . ?
C12 N4 C11 117.7(16) . . ?
C12 N4 Cu1 120.1(13) . . ?
C11 N4 Cu1 120.7(14) . . ?
 
_diffrn_measured_fraction_theta_max    0.920
_diffrn_reflns_theta_full              25.00
_diffrn_measured_fraction_theta_full   0.993
_refine_diff_density_max    4.684
_refine_diff_density_min   -4.291
_refine_diff_density_rms    0.582

#==============================================================end
 
data_3
 
_audit_creation_method            SHELXL-97
_chemical_name_systematic
;
 ?
;
_chemical_name_common             ?
_chemical_melting_point           ?
_chemical_formula_moiety          'C24 H32 Cu4 N8 O42 Si W12'
_chemical_formula_sum
 'C24 H32 Cu4 N8 O42 Si W12'
_chemical_formula_weight          3593.03
 
loop_
 _atom_type_symbol
 _atom_type_description
 _atom_type_scat_dispersion_real
 _atom_type_scat_dispersion_imag
 _atom_type_scat_source
 'C'  'C'   0.0033   0.0016
 'International Tables Vol C Tables 4.2.6.8 and 6.1.1.4'
 'H'  'H'   0.0000   0.0000
 'International Tables Vol C Tables 4.2.6.8 and 6.1.1.4'
 'N'  'N'   0.0061   0.0033
 'International Tables Vol C Tables 4.2.6.8 and 6.1.1.4'
 'O'  'O'   0.0106   0.0060
 'International Tables Vol C Tables 4.2.6.8 and 6.1.1.4'
 'Si'  'Si'   0.0817   0.0704
 'International Tables Vol C Tables 4.2.6.8 and 6.1.1.4'
 'Cu'  'Cu'   0.3201   1.2651
 'International Tables Vol C Tables 4.2.6.8 and 6.1.1.4'
 'W'  'W'  -0.8490   6.8722
 'International Tables Vol C Tables 4.2.6.8 and 6.1.1.4'
 
_symmetry_cell_setting            monoclinic
_symmetry_space_group_name_H-M     'C 2/c '
_symmetry_space_group_name_hall   '-C 2yc '
 
loop_
 _symmetry_equiv_pos_as_xyz
 'x, y, z'
 '-x, y, -z+1/2'
 'x+1/2, y+1/2, z'
 '-x+1/2, y+1/2, -z+1/2'
 '-x, -y, -z'
 'x, -y, z-1/2'
 '-x+1/2, -y+1/2, -z'
 'x+1/2, -y+1/2, z-1/2'
 
_cell_length_a                    24.800(5)
_cell_length_b                    11.392(5)
_cell_length_c                    25.025(5)
_cell_angle_alpha                 90.000(5)
_cell_angle_beta                  116.474(5)
_cell_angle_gamma                 90.000(5)
_cell_volume                      6329(3)
_cell_formula_units_Z             4
_cell_measurement_temperature     293(2)
_cell_measurement_reflns_used     7924
_cell_measurement_theta_min       4.3
_cell_measurement_theta_max       29.9
 
_exptl_crystal_description        block
_exptl_crystal_colour             red
_exptl_crystal_size_max           0.24
_exptl_crystal_size_mid           0.18
_exptl_crystal_size_min           0.16
_exptl_crystal_density_meas       ?
_exptl_crystal_density_diffrn     3.771
_exptl_crystal_density_method     'not measured'
_exptl_crystal_F_000              6344
_exptl_absorpt_coefficient_mu     23.136
_exptl_absorpt_correction_type    multi-scan
_exptl_absorpt_correction_T_min   0.012
_exptl_absorpt_correction_T_max   0.026
_exptl_absorpt_process_details    
;
CrysAlis (Oxford Diffraction, 2006)
; 
_exptl_special_details
;
 ?
;
 
_diffrn_ambient_temperature       293(2)
_diffrn_radiation_wavelength      0.71069
_diffrn_radiation_type            MoK\a
_diffrn_radiation_source          'fine-focus sealed tube'
_diffrn_radiation_monochromator   graphite
_diffrn_measurement_device_type   'Oxford Diffraction Gemini R Ultra'
_diffrn_measurement_method        '\w scan'
_diffrn_detector_area_resol_mean  10.0
_diffrn_standards_number          ?
_diffrn_standards_interval_count  ?
_diffrn_standards_interval_time   ?
_diffrn_standards_decay_%         ?
_diffrn_reflns_number             22039
_diffrn_reflns_av_R_equivalents   0.0472
_diffrn_reflns_av_sigmaI/netI     0.0813
_diffrn_reflns_limit_h_min        -33
_diffrn_reflns_limit_h_max        34
_diffrn_reflns_limit_k_min        -15
_diffrn_reflns_limit_k_max        15
_diffrn_reflns_limit_l_min        -35
_diffrn_reflns_limit_l_max        33
_diffrn_reflns_theta_min          4.30
_diffrn_reflns_theta_max          29.87
_reflns_number_total              7924
_reflns_number_gt                 4803
_reflns_threshold_expression      >2\s(I)
 
_computing_data_collection        'CrysAlis (Oxford Diffraction, 2006)'
_computing_cell_refinement        'CrysAlis'
_computing_data_reduction         'CrysAlis'
_computing_structure_solution     'SHELXS-97 (Sheldrick, 1997)'
_computing_structure_refinement   'SHELXL-97 (Sheldrick, 2008)'
_computing_molecular_graphics     ?
_computing_publication_material   ?
 
_refine_special_details
;
 Refinement of F^2^ against ALL reflections.  The weighted R-factor wR and
 goodness of fit S are based on F^2^, conventional R-factors R are based
 on F, with F set to zero for negative F^2^. The threshold expression of
 F^2^ > 2\s(F^2^) is used only for calculating R-factors(gt) etc. and is
 not relevant to the choice of reflections for refinement.  R-factors based
 on F^2^ are statistically about twice as large as those based on F, and R-
 factors based on ALL data will be even larger.
;
 
_refine_ls_structure_factor_coef  Fsqd
_refine_ls_matrix_type            full
_refine_ls_weighting_scheme       calc
_refine_ls_weighting_details
 'calc w=1/[\s^2^(Fo^2^)+(0.0432P)^2^+0.0000P] where P=(Fo^2^+2Fc^2^)/3'
_atom_sites_solution_primary      direct
_atom_sites_solution_secondary    difmap
_atom_sites_solution_hydrogens    geom
_refine_ls_hydrogen_treatment     constr
_refine_ls_extinction_method      none
_refine_ls_extinction_coef        ?
_refine_ls_number_reflns          7924
_refine_ls_number_parameters      432
_refine_ls_number_restraints      12
_refine_ls_R_factor_all           0.0824
_refine_ls_R_factor_gt            0.0389
_refine_ls_wR_factor_ref          0.0872
_refine_ls_wR_factor_gt           0.0789
_refine_ls_goodness_of_fit_ref    0.892
_refine_ls_restrained_S_all       0.900
_refine_ls_shift/su_max           0.002
_refine_ls_shift/su_mean          0.000
 
loop_
 _atom_site_label
 _atom_site_type_symbol
 _atom_site_fract_x
 _atom_site_fract_y
 _atom_site_fract_z
 _atom_site_U_iso_or_equiv
 _atom_site_adp_type
 _atom_site_occupancy
 _atom_site_symmetry_multiplicity
 _atom_site_calc_flag
 _atom_site_refinement_flags
 _atom_site_disorder_assembly
 _atom_site_disorder_group
Cu1 Cu -0.04885(7) 1.2643(2) -0.10716(7) 0.0761(6) Uani 1 1 d . . .
Cu2 Cu 0.20969(5) 1.19468(15) 0.13264(5) 0.0455(4) Uani 1 1 d . . .
W1 W 0.384570(16) 0.88128(4) 0.014932(17) 0.02871(11) Uani 1 1 d . . .
W2 W 0.172132(17) 0.86937(4) 0.075349(18) 0.03366(12) Uani 1 1 d . . .
W3 W 0.311558(18) 0.99035(4) 0.097640(18) 0.03375(12) Uani 1 1 d . . .
W4 W 0.24689(2) 1.03142(4) -0.058405(19) 0.03770(12) Uani 1 1 d . . .
W5 W 0.388691(16) 0.60515(5) 0.080897(19) 0.03807(13) Uani 1 1 d . . .
W6 W 0.306964(19) 0.71084(5) 0.155558(17) 0.04382(15) Uani 1 1 d . . .
C1 C 0.0770(5) 1.2293(11) -0.0427(4) 0.039(3) Uani 1 1 d . . .
C2 C 0.1315(4) 1.2123(10) 0.0097(4) 0.035(3) Uani 1 1 d . . .
H2 H 0.1676 1.2093 0.0069 0.042 Uiso 1 1 calc R . .
C3 C 0.0801(4) 1.1988(12) 0.0655(4) 0.041(3) Uani 1 1 d . . .
C4 C 0.0261(5) 1.2093(12) 0.0140(5) 0.053(3) Uani 1 1 d . . .
H4 H -0.0100 1.2058 0.0168 0.064 Uiso 1 1 calc R . .
C5 C -0.1829(4) 1.2094(11) -0.2799(4) 0.037(3) Uani 1 1 d . . .
H5 H -0.1910 1.1552 -0.3104 0.045 Uiso 1 1 calc R . .
C6 C -0.1309(4) 1.1932(11) -0.2272(5) 0.038(3) Uani 1 1 d . . .
C7 C -0.1584(5) 1.3590(12) -0.1926(4) 0.041(3) Uani 1 1 d . . .
H7 H -0.1513 1.4116 -0.1618 0.050 Uiso 1 1 calc R . .
C8 C -0.2098(4) 1.3741(10) -0.2470(4) 0.034(3) Uani 1 1 d . . .
C9 C 0.0780(6) 1.2466(13) -0.1012(5) 0.065(4) Uani 1 1 d . . .
H9A H 0.0575 1.1825 -0.1273 0.097 Uiso 1 1 calc R . .
H9B H 0.1190 1.2495 -0.0953 0.097 Uiso 1 1 calc R . .
H9C H 0.0581 1.3189 -0.1187 0.097 Uiso 1 1 calc R . .
C10 C 0.0818(5) 1.1906(16) 0.1253(5) 0.069(5) Uani 1 1 d . . .
H10A H 0.1230 1.1865 0.1553 0.104 Uiso 1 1 calc R . .
H10B H 0.0608 1.1213 0.1274 0.104 Uiso 1 1 calc R . .
H10C H 0.0629 1.2586 0.1322 0.104 Uiso 1 1 calc R . .
C11 C -0.0874(5) 1.0999(13) -0.2186(6) 0.061(4) Uani 1 1 d . . .
H11A H -0.0492 1.1339 -0.2109 0.091 Uiso 1 1 calc R . .
H11B H -0.1015 1.0523 -0.2539 0.091 Uiso 1 1 calc R . .
H11C H -0.0830 1.0521 -0.1852 0.091 Uiso 1 1 calc R . .
C12 C -0.2484(5) 1.4779(12) -0.2559(5) 0.054(3) Uani 1 1 d . . .
H12A H -0.2366 1.5389 -0.2750 0.081 Uiso 1 1 calc R . .
H12B H -0.2442 1.5053 -0.2180 0.081 Uiso 1 1 calc R . .
H12C H -0.2897 1.4571 -0.2807 0.081 Uiso 1 1 calc R . .
N1 N 0.0250(4) 1.2244(10) -0.0391(4) 0.048(3) Uani 1 1 d . . .
N2 N 0.1324(3) 1.2005(8) 0.0633(3) 0.035(2) Uani 1 1 d . . .
N3 N -0.1188(3) 1.2706(9) -0.1833(3) 0.040(2) Uani 1 1 d . . .
N4 N -0.2216(3) 1.2955(9) -0.2903(3) 0.033(2) Uani 1 1 d . . .
O1 O 0.2559(5) 0.8149(12) 0.0610(5) 0.022(3) Uiso 0.50 1 d P . .
O2 O 0.1873(5) 0.7684(12) -0.0023(5) 0.023(3) Uiso 0.50 1 d P . .
O3 O 0.2882(5) 0.8676(12) 0.0110(5) 0.020(3) Uiso 0.50 1 d P . .
O4 O 0.2885(4) 0.6576(11) 0.0544(5) 0.016(2) Uiso 0.50 1 d P . .
O5 O 0.4532(4) 0.5342(9) 0.1178(4) 0.069(3) Uani 1 1 d . . .
O6 O 0.4156(4) 0.7519(8) 0.0688(3) 0.068(3) Uani 1 1 d . . .
O7 O 0.3332(5) 0.4801(11) 0.0722(6) 0.116(6) Uani 1 1 d . . .
O8 O 0.1288(4) 0.7257(7) 0.0467(3) 0.063(3) Uani 1 1 d . . .
O9 O 0.1349(4) 0.9235(9) 0.1112(4) 0.066(3) Uani 1 1 d . . .
O10 O 0.1284(4) 0.9313(8) -0.0007(3) 0.063(3) Uani 1 1 d . . .
O11 O 0.2321(4) 0.9865(10) 0.0935(5) 0.088(3) Uani 1 1 d U . .
O12 O 0.2716(4) 1.0671(9) 0.0217(3) 0.064(3) Uani 1 1 d . . .
O13 O 0.2478(3) 1.1652(8) -0.0863(3) 0.050(2) Uani 1 1 d . . .
O14 O 0.3274(4) 0.9848(10) -0.0386(3) 0.075(3) Uani 1 1 d . . .
O15 O 0.4487(4) 0.9435(11) 0.0222(4) 0.080(4) Uani 1 1 d . . .
O16 O 0.3740(4) 0.9554(10) 0.0779(3) 0.075(3) Uani 1 1 d . . .
O17 O 0.3399(3) 1.1046(8) 0.1433(3) 0.048(2) Uani 1 1 d . . .
O18 O 0.3345(3) 0.6958(7) 0.2294(3) 0.045(2) Uani 1 1 d . . .
O19' O 0.2303(8) 0.7891(17) 0.1493(7) 0.037(5) Uani 0.50 1 d P . .
O19 O 0.2320(7) 0.7599(18) 0.1235(7) 0.037(5) Uani 0.50 1 d P . .
O20 O 0.3633(6) 0.6872(16) 0.1301(6) 0.036(4) Uani 0.50 1 d P . .
O20' O 0.3844(7) 0.6415(16) 0.1550(6) 0.033(4) Uani 0.50 1 d P . .
O21 O 0.3337(3) 0.8647(9) 0.1516(5) 0.081(3) Uani 1 1 d U . .
O22 O 0.2729(5) 0.5673(11) 0.1274(5) 0.102(5) Uani 1 1 d . . .
Si1 Si 0.2500 0.7500 0.0000 0.0179(8) Uani 1 2 d S . .
O1W O -0.0507(7) 1.4694(15) -0.1071(7) 0.169(8) Uani 1 1 d . . .
 
loop_
 _atom_site_aniso_label
 _atom_site_aniso_U_11
 _atom_site_aniso_U_22
 _atom_site_aniso_U_33
 _atom_site_aniso_U_23
 _atom_site_aniso_U_13
 _atom_site_aniso_U_12
Cu1 0.0528(8) 0.0958(17) 0.0370(8) 0.0066(9) -0.0184(7) 0.0054(10)
Cu2 0.0293(6) 0.0646(12) 0.0244(6) -0.0047(7) -0.0043(5) 0.0080(7)
W1 0.02546(18) 0.0295(3) 0.0325(2) -0.0021(2) 0.01419(16) -0.00341(19)
W2 0.0336(2) 0.0373(3) 0.0372(2) 0.0007(2) 0.02204(18) 0.0035(2)
W3 0.0384(2) 0.0240(3) 0.0277(2) -0.0022(2) 0.00469(17) -0.0040(2)
W4 0.0604(3) 0.0232(3) 0.0367(2) -0.0011(2) 0.0281(2) -0.0089(2)
W5 0.02364(18) 0.0434(3) 0.0392(2) -0.0078(2) 0.00680(17) 0.0041(2)
W6 0.0449(2) 0.0630(4) 0.01701(19) 0.0023(2) 0.00789(18) -0.0190(2)
C1 0.047(6) 0.030(7) 0.022(5) -0.003(5) -0.001(5) -0.017(6)
C2 0.031(5) 0.031(7) 0.032(5) -0.010(5) 0.005(4) -0.008(5)
C3 0.021(4) 0.069(10) 0.025(5) 0.000(6) 0.002(4) 0.008(5)
C4 0.034(5) 0.060(10) 0.048(7) 0.005(7) 0.002(5) 0.006(6)
C5 0.042(6) 0.033(7) 0.026(5) -0.012(5) 0.006(5) -0.004(6)
C6 0.030(5) 0.041(8) 0.036(6) 0.007(6) 0.009(5) -0.002(5)
C7 0.044(6) 0.046(8) 0.023(5) 0.003(5) 0.004(4) -0.004(6)
C8 0.030(5) 0.032(7) 0.026(5) 0.014(5) 0.001(4) 0.003(5)
C9 0.068(8) 0.058(10) 0.031(6) 0.004(7) -0.010(6) -0.022(8)
C10 0.046(6) 0.108(15) 0.050(7) -0.001(8) 0.018(6) 0.018(8)
C11 0.059(7) 0.047(10) 0.068(9) 0.002(7) 0.021(7) 0.002(7)
C12 0.051(7) 0.062(10) 0.036(6) 0.008(7) 0.009(5) 0.002(7)
N1 0.039(5) 0.052(8) 0.029(5) 0.006(5) -0.007(4) -0.001(5)
N2 0.035(4) 0.038(6) 0.020(4) -0.004(4) 0.000(3) -0.006(4)
N3 0.032(4) 0.050(7) 0.022(4) -0.005(5) -0.002(4) -0.007(5)
N4 0.025(4) 0.047(7) 0.023(4) 0.002(4) 0.006(3) -0.006(4)
O5 0.051(5) 0.042(6) 0.076(6) 0.006(5) -0.006(4) 0.009(4)
O6 0.115(7) 0.033(6) 0.031(4) -0.002(4) 0.010(5) 0.007(5)
O7 0.125(9) 0.133(12) 0.151(10) -0.120(10) 0.116(9) -0.098(9)
O8 0.113(7) 0.016(5) 0.034(4) -0.010(4) 0.010(5) -0.004(5)
O9 0.104(7) 0.051(7) 0.076(6) -0.004(5) 0.072(6) -0.006(6)
O10 0.119(7) 0.023(5) 0.030(4) 0.005(4) 0.018(5) 0.009(5)
O11 0.048(4) 0.085(7) 0.107(7) 0.054(5) 0.014(4) -0.008(5)
O12 0.078(5) 0.081(8) 0.033(4) 0.025(5) 0.026(4) 0.065(6)
O13 0.060(5) 0.043(6) 0.041(4) 0.014(4) 0.018(4) 0.013(4)
O14 0.098(6) 0.098(9) 0.026(4) 0.012(5) 0.026(4) 0.066(6)
O15 0.053(5) 0.130(11) 0.055(5) -0.015(6) 0.022(4) -0.052(6)
O16 0.109(7) 0.089(8) 0.036(4) 0.011(5) 0.040(5) 0.071(7)
O17 0.040(4) 0.048(6) 0.046(4) -0.024(4) 0.011(3) 0.007(4)
O18 0.058(4) 0.047(6) 0.023(3) 0.001(4) 0.012(3) -0.016(4)
O19' 0.052(9) 0.043(12) 0.021(8) 0.019(9) 0.021(8) 0.021(8)
O19 0.046(9) 0.051(14) 0.021(8) 0.007(9) 0.021(8) -0.005(8)
O20 0.027(8) 0.043(12) 0.017(8) -0.006(8) -0.008(6) 0.011(8)
O20' 0.031(8) 0.045(12) 0.012(7) -0.003(7) 0.001(6) -0.001(8)
O21 0.031(3) 0.070(6) 0.113(7) 0.063(5) 0.007(4) -0.001(4)
O22 0.103(7) 0.128(11) 0.122(9) -0.110(8) 0.091(7) -0.096(8)
Si1 0.0207(15) 0.019(2) 0.0118(14) 0.0017(15) 0.0058(13) -0.0041(16)
O1W 0.120(10) 0.121(14) 0.148(13) -0.002(11) -0.044(9) -0.048(10)
 
_geom_special_details
;
 All s.u.'s (except the s.u. in the dihedral angle between two l.s. planes)
 are estimated using the full covariance matrix.  The cell s.u.'s are taken
 into account individually in the estimation of s.u.'s in distances, angles
 and torsion angles; correlations between s.u.'s in cell parameters are only
 used when they are defined by crystal symmetry.  An approximate (isotropic)
 treatment of cell s.u.'s is used for estimating s.u.'s involving l.s. planes.
;
 
loop_
 _geom_bond_atom_site_label_1
 _geom_bond_atom_site_label_2
 _geom_bond_distance
 _geom_bond_site_symmetry_2
 _geom_bond_publ_flag
Cu1 N1 1.918(8) . ?
Cu1 N3 1.923(8) . ?
Cu1 O1W 2.337(17) . ?
Cu2 N4 1.925(7) 8_576 ?
Cu2 N2 1.931(7) . ?
W1 O15 1.674(8) . ?
W1 O14 1.872(8) . ?
W1 O8 1.876(8) 7_565 ?
W1 O16 1.906(7) . ?
W1 O6 1.912(9) . ?
W1 O3 2.353(10) . ?
W1 O2 2.384(12) 7_565 ?
W2 O9 1.666(8) . ?
W2 O10 1.858(7) . ?
W2 O11 1.896(10) . ?
W2 O19 1.902(18) . ?
W2 O8 1.913(8) . ?
W2 O19' 1.991(15) . ?
W2 O1 2.345(11) . ?
W2 O2 2.427(12) . ?
W3 O17 1.667(8) . ?
W3 O16 1.867(8) . ?
W3 O21 1.875(8) . ?
W3 O12 1.918(7) . ?
W3 O11 1.927(9) . ?
W3 O1 2.369(13) . ?
W3 O3 2.423(12) . ?
W4 O13 1.681(9) . ?
W4 O12 1.862(7) . ?
W4 O7 1.863(10) 7_565 ?
W4 O14 1.905(9) . ?
W4 O22 1.931(8) 7_565 ?
W4 O4 2.344(12) 7_565 ?
W4 O3 2.442(12) . ?
W5 O5 1.658(8) . ?
W5 O20 1.864(15) . ?
W5 O6 1.875(10) . ?
W5 O10 1.904(8) 7_565 ?
W5 O7 1.924(10) . ?
W5 O20' 1.949(13) . ?
W5 O4 2.345(10) . ?
W5 O2 2.489(12) 7_565 ?
W6 O18 1.669(6) . ?
W6 O19 1.755(17) . ?
W6 O20 1.796(15) . ?
W6 O22 1.832(10) . ?
W6 O21 1.892(10) . ?
W6 O19' 2.042(16) . ?
W6 O20' 2.082(16) . ?
W6 O1 2.436(12) . ?
W6 O4 2.439(11) . ?
C1 N1 1.335(14) . ?
C1 C2 1.415(13) . ?
C1 C9 1.489(15) . ?
C2 N2 1.337(12) . ?
C3 N2 1.322(12) . ?
C3 C4 1.389(13) . ?
C3 C10 1.481(15) . ?
C4 N1 1.328(15) . ?
C5 N4 1.316(13) . ?
C5 C6 1.386(13) . ?
C6 N3 1.334(14) . ?
C6 C11 1.459(16) . ?
C7 N3 1.353(14) . ?
C7 C8 1.399(13) . ?
C8 N4 1.334(14) . ?
C8 C12 1.475(16) . ?
N4 Cu2 1.925(7) 8_475 ?
O1 Si1 1.642(12) . ?
O1 O2 1.811(15) . ?
O2 Si1 1.544(11) . ?
O2 O3 1.713(18) 7_565 ?
O2 W1 2.384(12) 7_565 ?
O2 W5 2.489(12) 7_565 ?
O3 Si1 1.592(12) . ?
O3 O2 1.713(18) 7_565 ?
O4 Si1 1.648(11) . ?
O4 W4 2.344(12) 7_565 ?
O7 W4 1.863(10) 7_565 ?
O8 W1 1.876(8) 7_565 ?
O10 W5 1.904(8) 7_565 ?
O19' O19 0.745(17) . ?
O20 O20' 0.802(16) . ?
O22 W4 1.931(8) 7_565 ?
Si1 O2 1.544(11) 7_565 ?
Si1 O3 1.592(12) 7_565 ?
Si1 O1 1.642(12) 7_565 ?
Si1 O4 1.648(11) 7_565 ?
 
loop_
 _geom_angle_atom_site_label_1
 _geom_angle_atom_site_label_2
 _geom_angle_atom_site_label_3
 _geom_angle
 _geom_angle_site_symmetry_1
 _geom_angle_site_symmetry_3
 _geom_angle_publ_flag
N1 Cu1 N3 166.1(5) . . ?
N1 Cu1 O1W 104.4(4) . . ?
N3 Cu1 O1W 87.4(5) . . ?
N4 Cu2 N2 168.4(4) 8_576 . ?
O15 W1 O14 101.0(5) . . ?
O15 W1 O8 100.2(5) . 7_565 ?
O14 W1 O8 91.2(4) . 7_565 ?
O15 W1 O16 101.3(5) . . ?
O14 W1 O16 88.5(3) . . ?
O8 W1 O16 158.2(5) 7_565 . ?
O15 W1 O6 100.7(5) . . ?
O14 W1 O6 158.2(5) . . ?
O8 W1 O6 87.0(4) 7_565 . ?
O16 W1 O6 85.4(4) . . ?
O15 W1 O3 158.4(5) . . ?
O14 W1 O3 65.2(4) . . ?
O8 W1 O3 96.8(4) 7_565 . ?
O16 W1 O3 63.4(4) . . ?
O6 W1 O3 93.5(4) . . ?
O15 W1 O2 159.2(5) . 7_565 ?
O14 W1 O2 94.1(5) . 7_565 ?
O8 W1 O2 65.1(4) 7_565 7_565 ?
O16 W1 O2 93.2(5) . 7_565 ?
O6 W1 O2 65.5(4) . 7_565 ?
O3 W1 O2 42.4(4) . 7_565 ?
O9 W2 O10 101.6(4) . . ?
O9 W2 O11 100.1(5) . . ?
O10 W2 O11 90.9(4) . . ?
O9 W2 O19 111.4(6) . . ?
O10 W2 O19 146.3(6) . . ?
O11 W2 O19 90.2(6) . . ?
O9 W2 O8 99.5(4) . . ?
O10 W2 O8 88.1(4) . . ?
O11 W2 O8 160.2(5) . . ?
O19 W2 O8 80.0(6) . . ?
O9 W2 O19' 90.9(6) . . ?
O10 W2 O19' 167.6(5) . . ?
O11 W2 O19' 86.3(6) . . ?
O19 W2 O19' 21.9(5) . . ?
O8 W2 O19' 90.5(6) . . ?
O9 W2 O1 157.3(4) . . ?
O10 W2 O1 95.5(4) . . ?
O11 W2 O1 64.5(5) . . ?
O19 W2 O1 55.1(5) . . ?
O8 W2 O1 96.0(4) . . ?
O19' W2 O1 72.3(5) . . ?
O9 W2 O2 158.0(4) . . ?
O10 W2 O2 65.7(4) . . ?
O11 W2 O2 98.0(5) . . ?
O19 W2 O2 80.8(6) . . ?
O8 W2 O2 63.7(4) . . ?
O19' W2 O2 102.7(6) . . ?
O1 W2 O2 44.6(4) . . ?
O17 W3 O16 101.6(4) . . ?
O17 W3 O21 101.7(5) . . ?
O16 W3 O21 91.0(4) . . ?
O17 W3 O12 101.4(4) . . ?
O16 W3 O12 87.6(3) . . ?
O21 W3 O12 156.7(5) . . ?
O17 W3 O11 99.4(5) . . ?
O16 W3 O11 158.4(5) . . ?
O21 W3 O11 89.2(4) . . ?
O12 W3 O11 83.8(4) . . ?
O17 W3 O1 156.8(4) . . ?
O16 W3 O1 97.2(4) . . ?
O21 W3 O1 64.4(4) . . ?
O12 W3 O1 92.7(4) . . ?
O11 W3 O1 63.6(5) . . ?
O17 W3 O3 157.5(4) . . ?
O16 W3 O3 62.3(4) . . ?
O21 W3 O3 94.6(5) . . ?
O12 W3 O3 64.2(4) . . ?
O11 W3 O3 96.2(5) . . ?
O1 W3 O3 45.6(4) . . ?
O13 W4 O12 101.0(4) . . ?
O13 W4 O7 101.4(5) . 7_565 ?
O12 W4 O7 91.6(4) . 7_565 ?
O13 W4 O14 98.8(4) . . ?
O12 W4 O14 88.7(3) . . ?
O7 W4 O14 159.3(6) 7_565 . ?
O13 W4 O22 101.6(5) . 7_565 ?
O12 W4 O22 157.0(5) . 7_565 ?
O7 W4 O22 88.2(4) 7_565 7_565 ?
O14 W4 O22 83.6(4) . 7_565 ?
O13 W4 O4 157.7(4) . 7_565 ?
O12 W4 O4 96.0(4) . 7_565 ?
O7 W4 O4 63.5(5) 7_565 7_565 ?
O14 W4 O4 95.8(4) . 7_565 ?
O22 W4 O4 63.4(4) 7_565 7_565 ?
O13 W4 O3 155.4(4) . . ?
O12 W4 O3 64.4(4) . . ?
O7 W4 O3 98.8(5) 7_565 . ?
O14 W4 O3 62.8(4) . . ?
O22 W4 O3 92.9(5) 7_565 . ?
O4 W4 O3 46.7(4) 7_565 . ?
O5 W5 O20 113.7(6) . . ?
O5 W5 O6 101.5(4) . . ?
O20 W5 O6 84.8(7) . . ?
O5 W5 O10 100.8(5) . 7_565 ?
O20 W5 O10 145.4(5) . 7_565 ?
O6 W5 O10 87.2(4) . 7_565 ?
O5 W5 O7 99.6(6) . . ?
O20 W5 O7 90.6(6) . . ?
O6 W5 O7 158.5(5) . . ?
O10 W5 O7 84.7(4) 7_565 . ?
O5 W5 O20' 91.3(6) . . ?
O20 W5 O20' 24.1(5) . . ?
O6 W5 O20' 98.0(6) . . ?
O10 W5 O20' 165.7(5) 7_565 . ?
O7 W5 O20' 85.7(6) . . ?
O5 W5 O4 156.8(5) . . ?
O20 W5 O4 55.4(5) . . ?
O6 W5 O4 97.8(4) . . ?
O10 W5 O4 92.7(4) 7_565 . ?
O7 W5 O4 62.8(5) . . ?
O20' W5 O4 73.4(5) . . ?
O5 W5 O2 157.7(4) . 7_565 ?
O20 W5 O2 82.6(6) . 7_565 ?
O6 W5 O2 63.6(4) . 7_565 ?
O10 W5 O2 63.8(4) 7_565 7_565 ?
O7 W5 O2 95.0(5) . 7_565 ?
O20' W5 O2 106.6(6) . 7_565 ?
O4 W5 O2 45.2(4) . 7_565 ?
O18 W6 O19 111.5(6) . . ?
O18 W6 O20 112.2(5) . . ?
O19 W6 O20 135.9(7) . . ?
O18 W6 O22 103.0(5) . . ?
O19 W6 O22 84.0(8) . . ?
O20 W6 O22 91.6(6) . . ?
O18 W6 O21 99.9(4) . . ?
O19 W6 O21 90.3(7) . . ?
O20 W6 O21 77.0(7) . . ?
O22 W6 O21 156.9(5) . . ?
O18 W6 O19' 92.2(5) . . ?
O19 W6 O19' 20.9(6) . . ?
O20 W6 O19' 152.1(7) . . ?
O22 W6 O19' 96.1(7) . . ?
O21 W6 O19' 85.8(6) . . ?
O18 W6 O20' 92.6(5) . . ?
O19 W6 O20' 155.4(6) . . ?
O20 W6 O20' 22.3(5) . . ?
O22 W6 O20' 85.8(6) . . ?
O21 W6 O20' 90.3(6) . . ?
O19' W6 O20' 174.4(6) . . ?
O18 W6 O1 154.8(4) . . ?
O19 W6 O1 54.2(5) . . ?
O20 W6 O1 82.9(6) . . ?
O22 W6 O1 96.3(5) . . ?
O21 W6 O1 62.7(4) . . ?
O19' W6 O1 69.6(5) . . ?
O20' W6 O1 105.0(5) . . ?
O18 W6 O4 156.6(4) . . ?
O19 W6 O4 86.2(6) . . ?
O20 W6 O4 53.8(5) . . ?
O22 W6 O4 62.5(5) . . ?
O21 W6 O4 94.9(5) . . ?
O19' W6 O4 107.0(5) . . ?
O20' W6 O4 69.2(4) . . ?
O1 W6 O4 48.5(4) . . ?
N1 C1 C2 119.0(9) . . ?
N1 C1 C9 120.7(9) . . ?
C2 C1 C9 120.2(10) . . ?
N2 C2 C1 121.6(9) . . ?
N2 C3 C4 121.1(10) . . ?
N2 C3 C10 117.1(8) . . ?
C4 C3 C10 121.7(10) . . ?
N1 C4 C3 121.5(10) . . ?
N4 C5 C6 125.1(10) . . ?
N3 C6 C5 117.9(10) . . ?
N3 C6 C11 118.6(10) . . ?
C5 C6 C11 123.4(11) . . ?
N3 C7 C8 122.4(11) . . ?
N4 C8 C7 118.8(10) . . ?
N4 C8 C12 121.5(9) . . ?
C7 C8 C12 119.7(11) . . ?
C4 N1 C1 118.8(9) . . ?
C4 N1 Cu1 120.4(8) . . ?
C1 N1 Cu1 120.0(7) . . ?
C3 N2 C2 117.8(8) . . ?
C3 N2 Cu2 124.1(7) . . ?
C2 N2 Cu2 118.0(6) . . ?
C6 N3 C7 118.1(9) . . ?
C6 N3 Cu1 124.3(8) . . ?
C7 N3 Cu1 117.6(7) . . ?
C5 N4 C8 117.6(8) . . ?
C5 N4 Cu2 118.9(7) . 8_475 ?
C8 N4 Cu2 123.5(7) . 8_475 ?
Si1 O1 O2 52.8(5) . . ?
Si1 O1 W2 122.9(6) . . ?
O2 O1 W2 70.1(5) . . ?
Si1 O1 W3 122.4(6) . . ?
O2 O1 W3 138.0(8) . . ?
W2 O1 W3 96.9(5) . . ?
Si1 O1 W6 118.5(7) . . ?
O2 O1 W6 125.8(8) . . ?
W2 O1 W6 95.3(4) . . ?
W3 O1 W6 94.2(4) . . ?
Si1 O2 O3 58.3(5) . 7_565 ?
Si1 O2 O1 58.0(5) . . ?
O3 O2 O1 97.4(8) 7_565 . ?
Si1 O2 W1 126.1(7) . 7_565 ?
O3 O2 W1 67.8(6) 7_565 7_565 ?
O1 O2 W1 132.9(7) . 7_565 ?
Si1 O2 W2 123.2(6) . . ?
O3 O2 W2 136.2(7) 7_565 . ?
O1 O2 W2 65.3(5) . . ?
W1 O2 W2 94.1(4) 7_565 . ?
Si1 O2 W5 120.2(6) . 7_565 ?
O3 O2 W5 127.5(7) 7_565 7_565 ?
O1 O2 W5 127.4(8) . 7_565 ?
W1 O2 W5 92.9(4) 7_565 7_565 ?
W2 O2 W5 91.4(4) . 7_565 ?
Si1 O3 O2 55.6(6) . 7_565 ?
Si1 O3 W1 125.3(7) . . ?
O2 O3 W1 69.8(5) 7_565 . ?
Si1 O3 W3 121.8(6) . . ?
O2 O3 W3 132.8(7) 7_565 . ?
W1 O3 W3 95.2(4) . . ?
Si1 O3 W4 119.4(6) . . ?
O2 O3 W4 131.3(7) 7_565 . ?
W1 O3 W4 94.3(4) . . ?
W3 O3 W4 93.0(4) . . ?
Si1 O4 W4 122.1(5) . 7_565 ?
Si1 O4 W5 123.1(5) . . ?
W4 O4 W5 97.1(4) 7_565 . ?
Si1 O4 W6 118.0(6) . . ?
W4 O4 W6 94.9(4) 7_565 . ?
W5 O4 W6 94.9(4) . . ?
W5 O6 W1 137.8(5) . . ?
W4 O7 W5 136.3(8) 7_565 . ?
W1 O8 W2 136.7(5) 7_565 . ?
W2 O10 W5 138.7(5) . 7_565 ?
W2 O11 W3 134.6(7) . . ?
W4 O12 W3 138.1(5) . . ?
W1 O14 W4 137.2(6) . . ?
W3 O16 W1 138.5(6) . . ?
O19 O19' W2 72(2) . . ?
O19 O19' W6 57(2) . . ?
W2 O19' W6 122.4(7) . . ?
O19' O19 W6 102(2) . . ?
O19' O19 W2 86(2) . . ?
W6 O19 W2 150.1(10) . . ?
O20' O20 W6 99(2) . . ?
O20' O20 W5 83.9(17) . . ?
W6 O20 W5 148.8(9) . . ?
O20 O20' W5 72.0(16) . . ?
O20 O20' W6 58.4(17) . . ?
W5 O20' W6 121.9(7) . . ?
W3 O21 W6 138.4(5) . . ?
W6 O22 W4 138.9(6) . 7_565 ?
O2 Si1 O2 180.0(8) . 7_565 ?
O2 Si1 O3 113.8(6) . . ?
O2 Si1 O3 66.2(6) 7_565 . ?
O2 Si1 O3 66.2(6) . 7_565 ?
O2 Si1 O3 113.8(6) 7_565 7_565 ?
O3 Si1 O3 180.0(7) . 7_565 ?
O2 Si1 O1 69.2(6) . . ?
O2 Si1 O1 110.8(6) 7_565 . ?
O3 Si1 O1 70.2(6) . . ?
O3 Si1 O1 109.8(6) 7_565 . ?
O2 Si1 O1 110.8(6) . 7_565 ?
O2 Si1 O1 69.2(6) 7_565 7_565 ?
O3 Si1 O1 109.8(6) . 7_565 ?
O3 Si1 O1 70.2(6) 7_565 7_565 ?
O1 Si1 O1 180.0(4) . 7_565 ?
O2 Si1 O4 71.3(6) . 7_565 ?
O2 Si1 O4 108.7(6) 7_565 7_565 ?
O3 Si1 O4 71.7(6) . 7_565 ?
O3 Si1 O4 108.3(6) 7_565 7_565 ?
O1 Si1 O4 105.0(6) . 7_565 ?
O1 Si1 O4 75.0(6) 7_565 7_565 ?
O2 Si1 O4 108.7(6) . . ?
O2 Si1 O4 71.3(6) 7_565 . ?
O3 Si1 O4 108.3(6) . . ?
O3 Si1 O4 71.7(6) 7_565 . ?
O1 Si1 O4 75.0(6) . . ?
O1 Si1 O4 105.0(6) 7_565 . ?
O4 Si1 O4 180.0(9) 7_565 . ?
 
_diffrn_measured_fraction_theta_max    0.868
_diffrn_reflns_theta_full              25.00
_diffrn_measured_fraction_theta_full   0.990
_refine_diff_density_max    1.762
_refine_diff_density_min   -1.988
_refine_diff_density_rms    0.277
#==========================================================end
 
data_4
 
_audit_creation_method            SHELXL-97
_chemical_name_systematic
;
 ?
;
_chemical_name_common             ?
_chemical_melting_point           ?
_chemical_formula_moiety          'C32 H50 Cu4 N8 O41 Si W12'
_chemical_formula_sum
 'C32 H50 Cu4 N8 O41 Si W12'
_chemical_formula_weight          3691.25
 
loop_
 _atom_type_symbol
 _atom_type_description
 _atom_type_scat_dispersion_real
 _atom_type_scat_dispersion_imag
 _atom_type_scat_source
 'C'  'C'   0.0033   0.0016
 'International Tables Vol C Tables 4.2.6.8 and 6.1.1.4'
 'H'  'H'   0.0000   0.0000
 'International Tables Vol C Tables 4.2.6.8 and 6.1.1.4'
 'N'  'N'   0.0061   0.0033
 'International Tables Vol C Tables 4.2.6.8 and 6.1.1.4'
 'O'  'O'   0.0106   0.0060
 'International Tables Vol C Tables 4.2.6.8 and 6.1.1.4'
 'Si'  'Si'   0.0817   0.0704
 'International Tables Vol C Tables 4.2.6.8 and 6.1.1.4'
 'Cu'  'Cu'   0.3201   1.2651
 'International Tables Vol C Tables 4.2.6.8 and 6.1.1.4'
 'W'  'W'  -0.8490   6.8722
 'International Tables Vol C Tables 4.2.6.8 and 6.1.1.4'
 
_symmetry_cell_setting            monoclinic
_symmetry_space_group_name_H-M     'C 2/c '
_symmetry_space_group_name_hall   '-C 2yc '
 
 
loop_
 _symmetry_equiv_pos_as_xyz
 'x, y, z'
 '-x, y, -z+1/2'
 'x+1/2, y+1/2, z'
 '-x+1/2, y+1/2, -z+1/2'
 '-x, -y, -z'
 'x, -y, z-1/2'
 '-x+1/2, -y+1/2, -z'
 'x+1/2, -y+1/2, z-1/2'
 
_cell_length_a                    12.6564(5)
_cell_length_b                    22.9398(10)
_cell_length_c                    24.7425(9)
_cell_angle_alpha                 90.00
_cell_angle_beta                  99.040(3)
_cell_angle_gamma                 90.00
_cell_volume                      7094.4(5)
_cell_formula_units_Z             4
_cell_measurement_temperature     293(2)
_cell_measurement_reflns_used     6486
_cell_measurement_theta_min       2.7
_cell_measurement_theta_max       25.4
 
_exptl_crystal_description        block
_exptl_crystal_colour             red
_exptl_crystal_size_max           0.22
_exptl_crystal_size_mid           0.20
_exptl_crystal_size_min           0.16
_exptl_crystal_density_meas       ?
_exptl_crystal_density_diffrn     3.456
_exptl_crystal_density_method     'not measured'
_exptl_crystal_F_000              6576
_exptl_absorpt_coefficient_mu     20.643
_exptl_absorpt_correction_type     multi-scan
_exptl_absorpt_correction_T_min   0.016
_exptl_absorpt_correction_T_max   0.028
_exptl_absorpt_process_details    
;
CrysAlis (Oxford Diffraction, 2006)
; 
 
_exptl_special_details
;
 ?
;
 
 
_diffrn_ambient_temperature       293(2)
_diffrn_radiation_wavelength      0.71073
_diffrn_radiation_type            MoK\a
_diffrn_radiation_source          'fine-focus sealed tube'
_diffrn_radiation_monochromator   graphite
_diffrn_measurement_device_type   'Oxford Diffraction Gemini R Ultra'
_diffrn_measurement_method        '\w scan'
_diffrn_detector_area_resol_mean  10.0
_diffrn_standards_number          ?
_diffrn_standards_interval_count  ?
_diffrn_standards_interval_time   ?
_diffrn_standards_decay_%         ?
_diffrn_reflns_number             13754
_diffrn_reflns_av_R_equivalents   0.0522
_diffrn_reflns_av_sigmaI/netI     0.1440
_diffrn_reflns_limit_h_min        -15
_diffrn_reflns_limit_h_max        12
_diffrn_reflns_limit_k_min        -20
_diffrn_reflns_limit_k_max        27
_diffrn_reflns_limit_l_min        -29
_diffrn_reflns_limit_l_max        28
_diffrn_reflns_theta_min          2.66
_diffrn_reflns_theta_max          25.35
_reflns_number_total              6486
_reflns_number_gt                 3336
_reflns_threshold_expression      >2\s(I)
 
_computing_data_collection       'CrysAlis (Oxford Diffraction, 2006)'
_computing_cell_refinement       'CrysAlis'
_computing_data_reduction         'CrysAlis'
_computing_structure_solution     'SHELXS-97 (Sheldrick, 1997)'
_computing_structure_refinement   'SHELXL-97 (Sheldrick, 2008)'
_computing_molecular_graphics     ?
_computing_publication_material   ?
 
_refine_special_details
;
 Refinement of F^2^ against ALL reflections.  The weighted R-factor wR and
 goodness of fit S are based on F^2^, conventional R-factors R are based
 on F, with F set to zero for negative F^2^. The threshold expression of
 F^2^ > 2\s(F^2^) is used only for calculating R-factors(gt) etc. and is
 not relevant to the choice of reflections for refinement.  R-factors based
 on F^2^ are statistically about twice as large as those based on F, and R-
 factors based on ALL data will be even larger.
;
 
_refine_ls_structure_factor_coef  Fsqd
_refine_ls_matrix_type            full
_refine_ls_weighting_scheme       calc
_refine_ls_weighting_details
 'calc w=1/[\s^2^(Fo^2^)+(0.0214P)^2^+0.0000P] where P=(Fo^2^+2Fc^2^)/3'
_atom_sites_solution_primary      direct
_atom_sites_solution_secondary    difmap
_atom_sites_solution_hydrogens    geom
_refine_ls_hydrogen_treatment     constr
_refine_ls_extinction_method      none
_refine_ls_extinction_coef        ?
_refine_ls_number_reflns          6486
_refine_ls_number_parameters      450
_refine_ls_number_restraints      6
_refine_ls_R_factor_all           0.0860
_refine_ls_R_factor_gt            0.0382
_refine_ls_wR_factor_ref          0.0703
_refine_ls_wR_factor_gt           0.0656
_refine_ls_goodness_of_fit_ref    0.735
_refine_ls_restrained_S_all       0.735
_refine_ls_shift/su_max           0.001
_refine_ls_shift/su_mean          0.000
 
loop_
 _atom_site_label
 _atom_site_type_symbol
 _atom_site_fract_x
 _atom_site_fract_y
 _atom_site_fract_z
 _atom_site_U_iso_or_equiv
 _atom_site_adp_type
 _atom_site_occupancy
 _atom_site_symmetry_multiplicity
 _atom_site_calc_flag
 _atom_site_refinement_flags
 _atom_site_disorder_assembly
 _atom_site_disorder_group
Cu1 Cu 1.44675(16) 0.28450(10) 0.07818(7) 0.0566(6) Uani 1 1 d . . .
Cu2 Cu 1.19771(17) 0.53381(10) 0.08683(9) 0.0631(7) Uani 1 1 d . . .
W1 W 0.77375(4) 0.28016(3) 0.14831(2) 0.03376(17) Uani 1 1 d . . .
W2 W 1.16678(4) 0.29019(3) 0.14936(2) 0.03404(17) Uani 1 1 d . . .
W3 W 0.98050(5) 0.39372(3) 0.14768(2) 0.03318(16) Uani 1 1 d . . .
W4 W 0.95941(5) 0.17695(3) 0.14753(2) 0.03556(17) Uani 1 1 d . . .
W5 W 1.19450(5) 0.39420(3) 0.24569(2) 0.03782(18) Uani 1 1 d . . .
W6 W 0.80292(5) 0.17613(3) 0.24439(2) 0.04017(19) Uani 1 1 d . . .
C1 C 1.3034(11) 0.3759(8) 0.0359(6) 0.039(4) Uani 1 1 d . . .
C2 C 1.2468(11) 0.4263(7) 0.0413(6) 0.040(4) Uani 1 1 d . . .
C3 C 1.3588(11) 0.4515(7) 0.1201(6) 0.034(4) Uani 1 1 d . . .
C4 C 1.4128(9) 0.3995(6) 0.1168(5) 0.021(3) Uani 1 1 d . . .
C5 C 1.2795(12) 0.3340(8) -0.0110(6) 0.055(5) Uani 1 1 d . . .
H5A H 1.2131 0.3144 -0.0091 0.082 Uiso 1 1 calc R . .
H5B H 1.3360 0.3058 -0.0089 0.082 Uiso 1 1 calc R . .
H5C H 1.2741 0.3549 -0.0449 0.082 Uiso 1 1 calc R . .
C6 C 1.1458(11) 0.4412(9) 0.0021(7) 0.071(6) Uani 1 1 d . . .
H6A H 1.1259 0.4809 0.0078 0.106 Uiso 1 1 calc R . .
H6B H 1.0890 0.4157 0.0086 0.106 Uiso 1 1 calc R . .
H6C H 1.1584 0.4365 -0.0349 0.106 Uiso 1 1 calc R . .
C7 C 1.3935(11) 0.4970(8) 0.1615(5) 0.044(4) Uani 1 1 d . . .
H7A H 1.3800 0.5348 0.1453 0.066 Uiso 1 1 calc R . .
H7B H 1.4686 0.4928 0.1746 0.066 Uiso 1 1 calc R . .
H7C H 1.3543 0.4929 0.1915 0.066 Uiso 1 1 calc R . .
C8 C 1.5057(11) 0.3800(9) 0.1634(6) 0.069(6) Uani 1 1 d . . .
H8A H 1.4949 0.3401 0.1730 0.104 Uiso 1 1 calc R . .
H8B H 1.5057 0.4043 0.1949 0.104 Uiso 1 1 calc R . .
H8C H 1.5732 0.3836 0.1505 0.104 Uiso 1 1 calc R . .
C9 C 1.5002(10) 0.1706(7) 0.1190(5) 0.033(4) Uani 1 1 d U . .
C10 C 1.5541(11) 0.1164(7) 0.1212(6) 0.036(4) Uani 1 1 d . . .
C11 C 1.6281(10) 0.1435(7) 0.0454(5) 0.030(4) Uani 1 1 d . . .
C12 C 1.5677(10) 0.1933(7) 0.0393(5) 0.031(4) Uani 1 1 d . . .
C13 C 1.4412(11) 0.1883(8) 0.1639(6) 0.054(5) Uani 1 1 d . . .
H13A H 1.4774 0.2205 0.1835 0.082 Uiso 1 1 calc R . .
H13B H 1.4385 0.1561 0.1884 0.082 Uiso 1 1 calc R . .
H13C H 1.3698 0.1998 0.1486 0.082 Uiso 1 1 calc R . .
C14 C 1.5438(12) 0.0708(7) 0.1636(6) 0.046(4) Uani 1 1 d . . .
H14A H 1.4887 0.0436 0.1494 0.068 Uiso 1 1 calc R . .
H14B H 1.5258 0.0891 0.1958 0.068 Uiso 1 1 calc R . .
H14C H 1.6106 0.0504 0.1727 0.068 Uiso 1 1 calc R . .
C15 C 1.5672(13) 0.2375(8) -0.0050(5) 0.054(5) Uani 1 1 d . . .
H15A H 1.5785 0.2184 -0.0381 0.082 Uiso 1 1 calc R . .
H15B H 1.6232 0.2653 0.0056 0.082 Uiso 1 1 calc R . .
H15C H 1.4994 0.2572 -0.0109 0.082 Uiso 1 1 calc R . .
C16 C 1.7079(12) 0.1272(10) 0.0070(6) 0.073(7) Uani 1 1 d . . .
H16A H 1.7566 0.1589 0.0052 0.109 Uiso 1 1 calc R . .
H16B H 1.6697 0.1193 -0.0289 0.109 Uiso 1 1 calc R . .
H16C H 1.7473 0.0931 0.0208 0.109 Uiso 1 1 calc R . .
N1 N 1.3866(8) 0.3604(5) 0.0749(4) 0.032(3) Uani 1 1 d . . .
N2 N 1.2725(9) 0.4641(6) 0.0825(5) 0.042(3) Uani 1 1 d . . .
N3 N 1.5078(8) 0.2079(5) 0.0786(4) 0.029(3) Uani 1 1 d . . .
N4 N 1.6192(8) 0.1040(6) 0.0837(4) 0.030(3) Uani 1 1 d . . .
O1 O 0.7161(6) 0.2204(5) 0.1885(3) 0.038(3) Uani 1 1 d . . .
O2 O 1.0515(6) 0.2377(4) 0.1305(3) 0.028(2) Uani 1 1 d . . .
O3 O 1.1000(7) 0.4340(4) 0.1893(3) 0.036(2) Uani 1 1 d . . .
O4 O 1.2923(8) 0.4467(5) 0.2611(4) 0.059(3) Uani 1 1 d . . .
O5 O 0.7154(8) 0.1238(5) 0.2584(4) 0.064(4) Uani 1 1 d . . .
O6 O 0.6675(7) 0.2980(5) 0.0988(4) 0.054(3) Uani 1 1 d . . .
O7 O 0.9407(8) 0.4444(5) 0.0995(4) 0.054(3) Uani 1 1 d . . .
O8 O 1.2442(6) 0.2727(5) 0.1006(3) 0.046(3) Uani 1 1 d . . .
O9 O 0.9715(8) 0.1268(5) 0.0988(4) 0.056(3) Uani 1 1 d . . .
O10 O 1.0643(6) 0.3260(4) 0.2110(3) 0.021(2) Uani 1 1 d . . .
O11 O 0.9152(6) 0.2441(4) 0.2108(3) 0.022(2) Uani 1 1 d . . .
O12 O 1.2178(6) 0.2367(4) 0.2050(3) 0.033(2) Uani 1 1 d . . .
O13 O 1.0770(6) 0.3504(4) 0.1117(3) 0.031(2) Uani 1 1 d . . .
O14 O 0.7558(6) 0.3332(5) 0.2037(3) 0.032(3) Uani 1 1 d . . .
O15 O 0.8769(6) 0.3340(4) 0.1292(3) 0.030(2) Uani 1 1 d . . .
O16 O 0.8386(6) 0.2210(5) 0.1117(3) 0.035(2) Uani 1 1 d . . .
O17 O 0.8991(7) 0.4150(4) 0.2036(3) 0.034(2) Uani 1 1 d . . .
O18 O 0.8627(7) 0.1376(4) 0.1876(3) 0.040(3) Uani 1 1 d . . .
O19 O 1.0752(7) 0.1554(5) 0.2052(3) 0.041(3) Uani 1 1 d . . .
O20 O 1.2496(7) 0.3503(5) 0.1900(3) 0.035(3) Uani 1 1 d . . .
Si1 Si 1.0000 0.2852(3) 0.2500 0.0169(11) Uani 1 2 d S . .
O1W O 1.223(3) 0.0395(19) 0.1317(14) 0.141(13) Uiso 0.50 1 d P . .
 
loop_
 _atom_site_aniso_label
 _atom_site_aniso_U_11
 _atom_site_aniso_U_22
 _atom_site_aniso_U_33
 _atom_site_aniso_U_23
 _atom_site_aniso_U_13
 _atom_site_aniso_U_12
Cu1 0.0848(14) 0.0279(13) 0.0546(12) -0.0030(11) 0.0035(10) 0.0325(13)
Cu2 0.0705(14) 0.0335(16) 0.0811(15) -0.0098(12) -0.0014(12) 0.0341(12)
W1 0.0267(3) 0.0394(5) 0.0335(3) -0.0130(3) -0.0004(2) -0.0054(3)
W2 0.0309(3) 0.0407(5) 0.0327(3) 0.0116(3) 0.0115(2) 0.0018(3)
W3 0.0381(4) 0.0238(4) 0.0334(3) 0.0080(3) -0.0078(2) -0.0011(3)
W4 0.0510(4) 0.0240(4) 0.0351(3) -0.0087(3) 0.0173(3) -0.0026(3)
W5 0.0342(3) 0.0376(5) 0.0375(3) 0.0124(3) -0.0073(3) -0.0159(3)
W6 0.0482(4) 0.0365(5) 0.0397(3) -0.0119(3) 0.0190(3) -0.0225(4)
C1 0.027(8) 0.048(13) 0.042(9) 0.002(8) 0.005(7) 0.001(8)
C2 0.038(9) 0.023(11) 0.055(10) 0.009(8) 0.001(7) 0.014(8)
C3 0.040(9) 0.006(9) 0.062(10) 0.003(7) 0.023(8) 0.005(7)
C4 0.020(7) 0.009(8) 0.034(8) 0.003(6) 0.000(5) 0.001(6)
C5 0.076(12) 0.036(13) 0.047(9) -0.006(9) -0.008(8) 0.009(10)
C6 0.046(10) 0.086(19) 0.072(12) 0.009(11) -0.015(9) 0.033(11)
C7 0.052(10) 0.041(12) 0.045(9) -0.017(8) 0.022(7) -0.005(8)
C8 0.047(10) 0.068(17) 0.076(12) -0.006(11) -0.044(9) 0.026(10)
C9 0.031(6) 0.030(8) 0.037(6) -0.007(6) 0.000(5) 0.019(6)
C10 0.037(8) 0.021(10) 0.043(9) 0.002(7) -0.016(7) -0.012(8)
C11 0.043(9) 0.025(10) 0.018(7) -0.017(7) -0.007(6) 0.010(8)
C12 0.029(8) 0.023(10) 0.038(8) -0.008(7) 0.000(6) -0.004(7)
C13 0.038(9) 0.058(15) 0.072(11) 0.013(9) 0.021(8) -0.008(9)
C14 0.063(11) 0.010(10) 0.068(11) 0.000(8) 0.023(8) 0.009(8)
C15 0.092(13) 0.050(14) 0.020(7) -0.003(8) 0.004(8) -0.004(10)
C16 0.062(12) 0.11(2) 0.049(10) -0.041(11) 0.014(9) -0.009(12)
N1 0.042(7) 0.021(8) 0.034(6) 0.003(6) 0.010(6) -0.002(6)
N2 0.041(8) 0.042(10) 0.042(7) -0.007(7) 0.007(6) 0.017(7)
N3 0.036(6) 0.018(8) 0.030(6) -0.003(6) -0.008(5) 0.008(6)
N4 0.030(7) 0.027(8) 0.032(6) -0.002(6) -0.003(5) 0.014(6)
O1 0.037(5) 0.044(8) 0.034(5) -0.012(5) 0.014(4) -0.013(6)
O2 0.018(4) 0.024(7) 0.043(5) 0.012(4) 0.010(4) 0.011(4)
O3 0.050(6) 0.015(6) 0.037(5) 0.008(4) -0.008(4) -0.007(5)
O4 0.058(7) 0.026(8) 0.085(8) 0.013(6) -0.014(6) -0.024(6)
O5 0.069(7) 0.061(10) 0.071(7) -0.020(6) 0.044(6) -0.053(7)
O6 0.034(5) 0.078(11) 0.041(6) -0.003(6) -0.017(4) -0.009(6)
O7 0.069(7) 0.026(8) 0.060(7) 0.011(5) -0.012(5) -0.002(6)
O8 0.037(5) 0.068(10) 0.039(5) 0.022(5) 0.023(4) 0.014(6)
O9 0.078(8) 0.050(10) 0.043(6) -0.011(5) 0.018(5) -0.002(6)
O10 0.025(5) 0.014(6) 0.025(4) 0.001(4) 0.003(3) 0.003(4)
O11 0.025(5) 0.009(5) 0.032(5) 0.003(4) 0.007(4) 0.002(4)
O12 0.038(5) 0.029(7) 0.035(5) 0.008(4) 0.017(4) 0.009(5)
O13 0.035(5) 0.023(7) 0.034(5) 0.002(4) 0.002(4) -0.012(5)
O14 0.025(5) 0.046(8) 0.023(4) -0.014(5) -0.005(4) 0.005(5)
O15 0.027(5) 0.015(6) 0.047(5) 0.008(4) -0.002(4) 0.003(4)
O16 0.042(5) 0.020(7) 0.042(5) -0.007(5) 0.009(4) -0.015(5)
O17 0.048(6) 0.030(7) 0.022(5) 0.002(4) -0.002(4) 0.005(5)
O18 0.058(6) 0.023(7) 0.042(6) -0.008(5) 0.011(5) -0.017(5)
O19 0.061(6) 0.034(8) 0.034(5) -0.002(5) 0.023(4) 0.002(6)
O20 0.036(5) 0.038(8) 0.032(5) 0.005(5) 0.008(4) -0.004(5)
Si1 0.017(2) 0.011(3) 0.023(2) 0.000 0.0039(19) 0.000
 
_geom_special_details
;
 All s.u.'s (except the s.u. in the dihedral angle between two l.s. planes)
 are estimated using the full covariance matrix.  The cell s.u.'s are taken
 into account individually in the estimation of s.u.'s in distances, angles
 and torsion angles; correlations between s.u.'s in cell parameters are only
 used when they are defined by crystal symmetry.  An approximate (isotropic)
 treatment of cell s.u.'s is used for estimating s.u.'s involving l.s. planes.
;
 
loop_
 _geom_bond_atom_site_label_1
 _geom_bond_atom_site_label_2
 _geom_bond_distance
 _geom_bond_site_symmetry_2
 _geom_bond_publ_flag
Cu1 N1 1.897(12) . ?
Cu1 N3 1.919(12) . ?
Cu2 N2 1.869(13) . ?
Cu2 N4 1.887(12) 3_455 ?
W1 O6 1.721(8) . ?
W1 O14 1.873(8) . ?
W1 O16 1.889(10) . ?
W1 O1 1.906(10) . ?
W1 O15 1.911(9) . ?
W1 O11 2.326(8) . ?
W2 O8 1.718(8) . ?
W2 O12 1.882(9) . ?
W2 O2 1.892(9) . ?
W2 O20 1.919(10) . ?
W2 O13 1.933(9) . ?
W2 O10 2.303(7) . ?
W3 O7 1.684(10) . ?
W3 O15 1.901(9) . ?
W3 O13 1.901(9) . ?
W3 O17 1.912(8) . ?
W3 O3 1.926(9) . ?
W3 O10 2.340(8) . ?
W4 O9 1.690(10) . ?
W4 O2 1.906(9) . ?
W4 O18 1.918(9) . ?
W4 O16 1.928(9) . ?
W4 O19 1.942(9) . ?
W4 O11 2.327(8) . ?
W5 O4 1.726(10) . ?
W5 O14 1.917(9) 2_755 ?
W5 O17 1.918(9) 2_755 ?
W5 O3 1.920(8) . ?
W5 O20 1.924(9) . ?
W5 O10 2.336(8) . ?
W6 O5 1.705(10) . ?
W6 O19 1.886(9) 2_755 ?
W6 O18 1.914(9) . ?
W6 O12 1.915(9) 2_755 ?
W6 O1 1.916(10) . ?
W6 O11 2.347(8) . ?
C1 N1 1.359(16) . ?
C1 C2 1.38(2) . ?
C1 C5 1.50(2) . ?
C2 N2 1.340(19) . ?
C2 C6 1.517(18) . ?
C3 N2 1.350(17) . ?
C3 C4 1.383(19) . ?
C3 C7 1.482(19) . ?
C4 N1 1.372(16) . ?
C4 C8 1.577(17) . ?
C5 H5A 0.9600 . ?
C5 H5B 0.9600 . ?
C5 H5C 0.9600 . ?
C6 H6A 0.9600 . ?
C6 H6B 0.9600 . ?
C6 H6C 0.9600 . ?
C7 H7A 0.9600 . ?
C7 H7B 0.9600 . ?
C7 H7C 0.9600 . ?
C8 H8A 0.9600 . ?
C8 H8B 0.9600 . ?
C8 H8C 0.9600 . ?
C9 N3 1.330(18) . ?
C9 C10 1.41(2) . ?
C9 C13 1.489(18) . ?
C10 N4 1.364(17) . ?
C10 C14 1.50(2) . ?
C11 N4 1.329(18) . ?
C11 C12 1.369(19) . ?
C11 C16 1.539(18) . ?
C12 N3 1.366(15) . ?
C12 C15 1.49(2) . ?
C13 H13A 0.9600 . ?
C13 H13B 0.9600 . ?
C13 H13C 0.9600 . ?
C14 H14A 0.9600 . ?
C14 H14B 0.9600 . ?
C14 H14C 0.9600 . ?
C15 H15A 0.9600 . ?
C15 H15B 0.9600 . ?
C15 H15C 0.9600 . ?
C16 H16A 0.9600 . ?
C16 H16B 0.9600 . ?
C16 H16C 0.9600 . ?
N4 Cu2 1.887(12) 3_545 ?
O10 Si1 1.647(9) . ?
O11 Si1 1.630(9) . ?
O12 W6 1.915(9) 2_755 ?
O14 W5 1.917(9) 2_755 ?
O17 W5 1.918(9) 2_755 ?
O19 W6 1.886(9) 2_755 ?
Si1 O11 1.630(9) 2_755 ?
Si1 O10 1.647(9) 2_755 ?
 
loop_
 _geom_angle_atom_site_label_1
 _geom_angle_atom_site_label_2
 _geom_angle_atom_site_label_3
 _geom_angle
 _geom_angle_site_symmetry_1
 _geom_angle_site_symmetry_3
 _geom_angle_publ_flag
N1 Cu1 N3 177.9(4) . . ?
N2 Cu2 N4 174.5(5) . 3_455 ?
O6 W1 O14 101.3(4) . . ?
O6 W1 O16 100.3(4) . . ?
O14 W1 O16 158.3(3) . . ?
O6 W1 O1 102.9(4) . . ?
O14 W1 O1 89.1(4) . . ?
O16 W1 O1 87.9(4) . . ?
O6 W1 O15 99.1(4) . . ?
O14 W1 O15 85.9(4) . . ?
O16 W1 O15 88.9(4) . . ?
O1 W1 O15 158.1(3) . . ?
O6 W1 O11 172.7(5) . . ?
O14 W1 O11 85.0(3) . . ?
O16 W1 O11 73.5(3) . . ?
O1 W1 O11 73.4(3) . . ?
O15 W1 O11 84.9(3) . . ?
O8 W2 O12 101.2(4) . . ?
O8 W2 O2 100.4(4) . . ?
O12 W2 O2 85.9(4) . . ?
O8 W2 O20 102.2(4) . . ?
O12 W2 O20 89.4(4) . . ?
O2 W2 O20 157.4(3) . . ?
O8 W2 O13 100.6(4) . . ?
O12 W2 O13 158.0(3) . . ?
O2 W2 O13 87.9(4) . . ?
O20 W2 O13 88.3(4) . . ?
O8 W2 O10 172.5(4) . . ?
O12 W2 O10 85.0(3) . . ?
O2 W2 O10 84.1(3) . . ?
O20 W2 O10 73.4(3) . . ?
O13 W2 O10 73.5(3) . . ?
O7 W3 O15 102.0(4) . . ?
O7 W3 O13 99.9(5) . . ?
O15 W3 O13 88.8(4) . . ?
O7 W3 O17 101.6(5) . . ?
O15 W3 O17 85.9(4) . . ?
O13 W3 O17 158.5(4) . . ?
O7 W3 O3 99.7(5) . . ?
O15 W3 O3 158.1(4) . . ?
O13 W3 O3 89.6(4) . . ?
O17 W3 O3 87.6(4) . . ?
O7 W3 O10 170.4(4) . . ?
O15 W3 O10 84.6(3) . . ?
O13 W3 O10 73.1(3) . . ?
O17 W3 O10 85.7(3) . . ?
O3 W3 O10 74.1(3) . . ?
O9 W4 O2 102.3(4) . . ?
O9 W4 O18 100.6(5) . . ?
O2 W4 O18 157.0(4) . . ?
O9 W4 O16 100.6(5) . . ?
O2 W4 O16 89.1(3) . . ?
O18 W4 O16 87.7(4) . . ?
O9 W4 O19 102.0(5) . . ?
O2 W4 O19 86.1(4) . . ?
O18 W4 O19 88.3(4) . . ?
O16 W4 O19 157.4(4) . . ?
O9 W4 O11 171.4(4) . . ?
O2 W4 O11 83.4(3) . . ?
O18 W4 O11 74.0(3) . . ?
O16 W4 O11 72.8(3) . . ?
O19 W4 O11 84.7(3) . . ?
O4 W5 O14 102.4(4) . 2_755 ?
O4 W5 O17 100.2(5) . 2_755 ?
O14 W5 O17 85.8(4) 2_755 2_755 ?
O4 W5 O3 99.9(4) . . ?
O14 W5 O3 157.6(4) 2_755 . ?
O17 W5 O3 88.8(4) 2_755 . ?
O4 W5 O20 101.2(5) . . ?
O14 W5 O20 88.1(4) 2_755 . ?
O17 W5 O20 158.5(4) 2_755 . ?
O3 W5 O20 89.0(4) . . ?
O4 W5 O10 171.3(4) . . ?
O14 W5 O10 83.7(3) 2_755 . ?
O17 W5 O10 86.2(3) 2_755 . ?
O3 W5 O10 74.3(3) . . ?
O20 W5 O10 72.6(3) . . ?
O5 W6 O19 100.3(5) . 2_755 ?
O5 W6 O18 99.7(4) . . ?
O19 W6 O18 89.6(4) 2_755 . ?
O5 W6 O12 102.6(4) . 2_755 ?
O19 W6 O12 86.1(4) 2_755 2_755 ?
O18 W6 O12 157.8(4) . 2_755 ?
O5 W6 O1 101.6(5) . . ?
O19 W6 O1 158.1(4) 2_755 . ?
O18 W6 O1 87.9(4) . . ?
O12 W6 O1 88.0(4) 2_755 . ?
O5 W6 O11 171.1(4) . . ?
O19 W6 O11 85.6(3) 2_755 . ?
O18 W6 O11 73.5(3) . . ?
O12 W6 O11 84.4(3) 2_755 . ?
O1 W6 O11 72.8(3) . . ?
N1 C1 C2 120.5(14) . . ?
N1 C1 C5 114.9(14) . . ?
C2 C1 C5 124.6(13) . . ?
N2 C2 C1 123.3(13) . . ?
N2 C2 C6 114.8(14) . . ?
C1 C2 C6 121.8(15) . . ?
N2 C3 C4 120.0(14) . . ?
N2 C3 C7 116.4(14) . . ?
C4 C3 C7 123.6(14) . . ?
N1 C4 C3 123.0(12) . . ?
N1 C4 C8 115.4(13) . . ?
C3 C4 C8 121.4(13) . . ?
C1 C5 H5A 109.5 . . ?
C1 C5 H5B 109.5 . . ?
H5A C5 H5B 109.5 . . ?
C1 C5 H5C 109.5 . . ?
H5A C5 H5C 109.5 . . ?
H5B C5 H5C 109.5 . . ?
C2 C6 H6A 109.5 . . ?
C2 C6 H6B 109.5 . . ?
H6A C6 H6B 109.5 . . ?
C2 C6 H6C 109.5 . . ?
H6A C6 H6C 109.5 . . ?
H6B C6 H6C 109.5 . . ?
C3 C7 H7A 109.5 . . ?
C3 C7 H7B 109.5 . . ?
H7A C7 H7B 109.5 . . ?
C3 C7 H7C 109.5 . . ?
H7A C7 H7C 109.5 . . ?
H7B C7 H7C 109.5 . . ?
C4 C8 H8A 109.5 . . ?
C4 C8 H8B 109.5 . . ?
H8A C8 H8B 109.5 . . ?
C4 C8 H8C 109.5 . . ?
H8A C8 H8C 109.5 . . ?
H8B C8 H8C 109.5 . . ?
N3 C9 C10 120.3(12) . . ?
N3 C9 C13 119.1(14) . . ?
C10 C9 C13 120.4(14) . . ?
N4 C10 C9 119.7(13) . . ?
N4 C10 C14 117.2(14) . . ?
C9 C10 C14 123.1(14) . . ?
N4 C11 C12 122.6(12) . . ?
N4 C11 C16 114.4(15) . . ?
C12 C11 C16 122.9(15) . . ?
N3 C12 C11 119.3(13) . . ?
N3 C12 C15 114.6(13) . . ?
C11 C12 C15 125.9(13) . . ?
C9 C13 H13A 109.5 . . ?
C9 C13 H13B 109.5 . . ?
H13A C13 H13B 109.5 . . ?
C9 C13 H13C 109.5 . . ?
H13A C13 H13C 109.5 . . ?
H13B C13 H13C 109.5 . . ?
C10 C14 H14A 109.5 . . ?
C10 C14 H14B 109.5 . . ?
H14A C14 H14B 109.5 . . ?
C10 C14 H14C 109.5 . . ?
H14A C14 H14C 109.5 . . ?
H14B C14 H14C 109.5 . . ?
C12 C15 H15A 109.5 . . ?
C12 C15 H15B 109.5 . . ?
H15A C15 H15B 109.5 . . ?
C12 C15 H15C 109.5 . . ?
H15A C15 H15C 109.5 . . ?
H15B C15 H15C 109.5 . . ?
C11 C16 H16A 109.5 . . ?
C11 C16 H16B 109.5 . . ?
H16A C16 H16B 109.5 . . ?
C11 C16 H16C 109.5 . . ?
H16A C16 H16C 109.5 . . ?
H16B C16 H16C 109.5 . . ?
C1 N1 C4 115.7(13) . . ?
C1 N1 Cu1 122.1(10) . . ?
C4 N1 Cu1 121.4(9) . . ?
C2 N2 C3 117.2(13) . . ?
C2 N2 Cu2 122.2(10) . . ?
C3 N2 Cu2 120.5(11) . . ?
C9 N3 C12 119.3(13) . . ?
C9 N3 Cu1 121.2(9) . . ?
C12 N3 Cu1 119.3(10) . . ?
C11 N4 C10 118.1(13) . . ?
C11 N4 Cu2 120.5(9) . 3_545 ?
C10 N4 Cu2 121.4(10) . 3_545 ?
W1 O1 W6 122.3(4) . . ?
W2 O2 W4 152.3(4) . . ?
W5 O3 W3 120.5(5) . . ?
Si1 O10 W2 124.6(5) . . ?
Si1 O10 W5 123.4(4) . . ?
W2 O10 W5 92.5(3) . . ?
Si1 O10 W3 123.7(4) . . ?
W2 O10 W3 92.1(3) . . ?
W5 O10 W3 91.2(3) . . ?
Si1 O11 W1 123.7(5) . . ?
Si1 O11 W4 125.3(4) . . ?
W1 O11 W4 91.7(3) . . ?
Si1 O11 W6 123.6(4) . . ?
W1 O11 W6 91.5(3) . . ?
W4 O11 W6 91.2(3) . . ?
W2 O12 W6 152.2(5) . 2_755 ?
W3 O13 W2 121.3(4) . . ?
W1 O14 W5 152.5(5) . 2_755 ?
W3 O15 W1 151.4(5) . . ?
W1 O16 W4 122.0(4) . . ?
W3 O17 W5 150.2(6) . 2_755 ?
W6 O18 W4 121.3(5) . . ?
W6 O19 W4 150.0(6) 2_755 . ?
W2 O20 W5 121.4(4) . . ?
O11 Si1 O11 109.2(7) . 2_755 ?
O11 Si1 O10 109.7(4) . 2_755 ?
O11 Si1 O10 108.7(4) 2_755 2_755 ?
O11 Si1 O10 108.7(4) . . ?
O11 Si1 O10 109.7(4) 2_755 . ?
O10 Si1 O10 110.9(7) 2_755 . ?
 
loop_
 _geom_torsion_atom_site_label_1
 _geom_torsion_atom_site_label_2
 _geom_torsion_atom_site_label_3
 _geom_torsion_atom_site_label_4
 _geom_torsion
 _geom_torsion_site_symmetry_1
 _geom_torsion_site_symmetry_2
 _geom_torsion_site_symmetry_3
 _geom_torsion_site_symmetry_4
 _geom_torsion_publ_flag
N1 C1 C2 N2 4(2) . . . . ?
C5 C1 C2 N2 -177.3(15) . . . . ?
N1 C1 C2 C6 -172.6(14) . . . . ?
C5 C1 C2 C6 6(2) . . . . ?
N2 C3 C4 N1 4(2) . . . . ?
C7 C3 C4 N1 -173.0(12) . . . . ?
N2 C3 C4 C8 -173.1(13) . . . . ?
C7 C3 C4 C8 10(2) . . . . ?
N3 C9 C10 N4 4(2) . . . . ?
C13 C9 C10 N4 -171.4(12) . . . . ?
N3 C9 C10 C14 -176.3(13) . . . . ?
C13 C9 C10 C14 8(2) . . . . ?
N4 C11 C12 N3 10(2) . . . . ?
C16 C11 C12 N3 -172.7(12) . . . . ?
N4 C11 C12 C15 -175.2(13) . . . . ?
C16 C11 C12 C15 2(2) . . . . ?
C2 C1 N1 C4 -4(2) . . . . ?
C5 C1 N1 C4 177.0(12) . . . . ?
C2 C1 N1 Cu1 166.0(11) . . . . ?
C5 C1 N1 Cu1 -13.2(17) . . . . ?
C3 C4 N1 C1 0.4(19) . . . . ?
C8 C4 N1 C1 177.2(12) . . . . ?
C3 C4 N1 Cu1 -169.5(10) . . . . ?
C8 C4 N1 Cu1 7.3(16) . . . . ?


C1 C2 N2 C3 0(2) . . . . ?
C6 C2 N2 C3 176.9(13) . . . . ?
C1 C2 N2 Cu2 177.2(12) . . . . ?
C6 C2 N2 Cu2 -6.4(19) . . . . ?
C4 C3 N2 C2 -4(2) . . . . ?
C7 C3 N2 C2 173.0(13) . . . . ?
C4 C3 N2 Cu2 179.3(10) . . . . ?
C7 C3 N2 Cu2 -3.8(17) . . . . ?

C10 C9 N3 C12 0(2) . . . . ?
C13 C9 N3 C12 175.7(12) . . . . ?
C10 C9 N3 Cu1 -174.1(9) . . . . ?
C13 C9 N3 Cu1 1.3(18) . . . . ?
C11 C12 N3 C9 -7.1(19) . . . . ?
C15 C12 N3 C9 177.8(13) . . . . ?
C11 C12 N3 Cu1 167.4(10) . . . . ?
C15 C12 N3 Cu1 -7.7(15) . . . . ?

C12 C11 N4 C10 -6(2) . . . . ?
C16 C11 N4 C10 176.8(11) . . . . ?
C12 C11 N4 Cu2 175.7(10) . . . 3_545 ?
C16 C11 N4 Cu2 -1.6(16) . . . 3_545 ?
C9 C10 N4 C11 -1.1(18) . . . . ?
C14 C10 N4 C11 179.1(12) . . . . ?
C9 C10 N4 Cu2 177.2(10) . . . 3_545 ?
C14 C10 N4 Cu2 -2.6(16) . . . 3_545 ?
O6 W1 O1 W6 172.3(6) . . . . ?
O14 W1 O1 W6 -86.3(5) . . . . ?
O16 W1 O1 W6 72.2(6) . . . . ?
O15 W1 O1 W6 -9.7(14) . . . . ?
O11 W1 O1 W6 -1.3(5) . . . . ?
O5 W6 O1 W1 -171.6(6) . . . . ?
O19 W6 O1 W1 11.4(14) 2_755 . . . ?
O18 W6 O1 W1 -72.2(6) . . . . ?
O12 W6 O1 W1 86.0(6) 2_755 . . . ?
O11 W6 O1 W1 1.2(5) . . . . ?
O8 W2 O2 W4 124.7(10) . . . . ?
O12 W2 O2 W4 24.1(10) . . . . ?
O20 W2 O2 W4 -54.3(16) . . . . ?
O13 W2 O2 W4 -134.9(10) . . . . ?
O10 W2 O2 W4 -61.3(10) . . . . ?
O9 W4 O2 W2 -126.0(10) . . . . ?
O18 W4 O2 W2 51.6(15) . . . . ?
O16 W4 O2 W2 133.4(10) . . . . ?
O19 W4 O2 W2 -24.6(10) . . . . ?
O11 W4 O2 W2 60.5(10) . . . . ?
O4 W5 O3 W3 172.2(6) . . . . ?
O14 W5 O3 W3 -11.6(14) 2_755 . . . ?
O17 W5 O3 W3 -87.7(6) 2_755 . . . ?
O20 W5 O3 W3 70.9(6) . . . . ?
O10 W5 O3 W3 -1.2(4) . . . . ?
O7 W3 O3 W5 -171.3(6) . . . . ?
O15 W3 O3 W5 14.5(14) . . . . ?
O13 W3 O3 W5 -71.3(6) . . . . ?
O17 W3 O3 W5 87.4(6) . . . . ?
O10 W3 O3 W5 1.2(4) . . . . ?

O12 W2 O10 Si1 -42.5(5) . . . . ?
O2 W2 O10 Si1 43.8(5) . . . . ?
O20 W2 O10 Si1 -133.4(5) . . . . ?
O13 W2 O10 Si1 133.4(5) . . . . ?

O12 W2 O10 W5 91.8(3) . . . . ?
O2 W2 O10 W5 178.1(3) . . . . ?
O20 W2 O10 W5 0.9(3) . . . . ?
O13 W2 O10 W5 -92.3(4) . . . . ?

O12 W2 O10 W3 -177.0(4) . . . . ?
O2 W2 O10 W3 -90.6(3) . . . . ?
O20 W2 O10 W3 92.2(4) . . . . ?
O13 W2 O10 W3 -1.0(3) . . . . ?

O14 W5 O10 Si1 44.3(5) 2_755 . . . ?
O17 W5 O10 Si1 -42.0(5) 2_755 . . . ?
O3 W5 O10 Si1 -131.8(6) . . . . ?
O20 W5 O10 Si1 134.2(6) . . . . ?

O14 W5 O10 W2 -90.9(3) 2_755 . . . ?
O17 W5 O10 W2 -177.1(4) 2_755 . . . ?
O3 W5 O10 W2 93.0(4) . . . . ?
O20 W5 O10 W2 -0.9(3) . . . . ?

O14 W5 O10 W3 177.0(3) 2_755 . . . ?
O17 W5 O10 W3 90.7(3) 2_755 . . . ?
O3 W5 O10 W3 0.9(3) . . . . ?
O20 W5 O10 W3 -93.1(3) . . . . ?

O15 W3 O10 Si1 -43.5(6) . . . . ?
O13 W3 O10 Si1 -133.9(6) . . . . ?
O17 W3 O10 Si1 42.8(6) . . . . ?
O3 W3 O10 Si1 131.6(6) . . . . ?

O15 W3 O10 W2 91.5(3) . . . . ?
O13 W3 O10 W2 1.1(3) . . . . ?
O17 W3 O10 W2 177.8(4) . . . . ?
O3 W3 O10 W2 -93.4(4) . . . . ?

O15 W3 O10 W5 -175.9(3) . . . . ?
O13 W3 O10 W5 93.6(3) . . . . ?
O17 W3 O10 W5 -89.6(3) . . . . ?
O3 W3 O10 W5 -0.9(3) . . . . ?

O14 W1 O11 Si1 -41.7(5) . . . . ?
O16 W1 O11 Si1 135.0(5) . . . . ?
O1 W1 O11 Si1 -132.2(5) . . . . ?
O15 W1 O11 Si1 44.6(5) . . . . ?

O14 W1 O11 W4 -177.3(4) . . . . ?
O16 W1 O11 W4 -0.6(3) . . . . ?
O1 W1 O11 W4 92.1(4) . . . . ?
O15 W1 O11 W4 -91.0(3) . . . . ?

O14 W1 O11 W6 91.4(3) . . . . ?
O16 W1 O11 W6 -91.9(4) . . . . ?
O1 W1 O11 W6 0.9(3) . . . . ?
O15 W1 O11 W6 177.7(3) . . . . ?

O2 W4 O11 Si1 -42.8(6) . . . . ?
O18 W4 O11 Si1 133.5(6) . . . . ?
O16 W4 O11 Si1 -133.9(6) . . . . ?
O19 W4 O11 Si1 43.8(6) . . . . ?

O2 W4 O11 W1 91.7(3) . . . . ?
O18 W4 O11 W1 -91.9(4) . . . . ?
O16 W4 O11 W1 0.6(3) . . . . ?
O19 W4 O11 W1 178.4(4) . . . . ?

O2 W4 O11 W6 -176.7(3) . . . . ?
O18 W4 O11 W6 -0.4(3) . . . . ?
O16 W4 O11 W6 92.2(3) . . . . ?
O19 W4 O11 W6 -90.1(3) . . . . ?

O19 W6 O11 Si1 -43.9(6) 2_755 . . . ?
O18 W6 O11 Si1 -134.7(6) . . . . ?
O12 W6 O11 Si1 42.7(6) 2_755 . . . ?
O1 W6 O11 Si1 132.3(6) . . . . ?

O19 W6 O11 W1 -177.1(4) 2_755 . . . ?
O18 W6 O11 W1 92.1(4) . . . . ?
O12 W6 O11 W1 -90.5(3) 2_755 . . . ?
O1 W6 O11 W1 -0.9(3) . . . . ?

O19 W6 O11 W4 91.2(3) 2_755 . . . ?
O18 W6 O11 W4 0.4(3) . . . . ?
O12 W6 O11 W4 177.8(3) 2_755 . . . ?
O1 W6 O11 W4 -92.6(4) . . . . ?
O8 W2 O12 W6 -126.3(11) . . . 2_755 ?
O2 W2 O12 W6 -26.5(11) . . . 2_755 ?
O20 W2 O12 W6 131.4(11) . . . 2_755 ?
O13 W2 O12 W6 47.4(18) . . . 2_755 ?
O10 W2 O12 W6 57.9(11) . . . 2_755 ?
O7 W3 O13 W2 171.8(6) . . . . ?
O15 W3 O13 W2 -86.2(5) . . . . ?
O17 W3 O13 W2 -10.4(13) . . . . ?
O3 W3 O13 W2 72.0(5) . . . . ?
O10 W3 O13 W2 -1.5(4) . . . . ?
O8 W2 O13 W3 -173.8(6) . . . . ?
O12 W2 O13 W3 12.5(13) . . . . ?
O2 W2 O13 W3 86.0(5) . . . . ?
O20 W2 O13 W3 -71.7(5) . . . . ?
O10 W2 O13 W3 1.5(4) . . . . ?
O6 W1 O14 W5 -124.6(11) . . . 2_755 ?
O16 W1 O14 W5 50.4(19) . . . 2_755 ?
O1 W1 O14 W5 132.5(12) . . . 2_755 ?
O15 W1 O14 W5 -26.2(11) . . . 2_755 ?
O11 W1 O14 W5 59.0(11) . . . 2_755 ?
O7 W3 O15 W1 -129.7(10) . . . . ?
O13 W3 O15 W1 130.4(10) . . . . ?
O17 W3 O15 W1 -28.8(10) . . . . ?
O3 W3 O15 W1 44.4(17) . . . . ?
O10 W3 O15 W1 57.3(10) . . . . ?
O6 W1 O15 W3 128.5(10) . . . . ?
O14 W1 O15 W3 27.7(10) . . . . ?
O16 W1 O15 W3 -131.2(10) . . . . ?
O1 W1 O15 W3 -49.5(17) . . . . ?
O11 W1 O15 W3 -57.6(10) . . . . ?
O6 W1 O16 W4 -175.1(6) . . . . ?
O14 W1 O16 W4 9.9(14) . . . . ?
O1 W1 O16 W4 -72.4(5) . . . . ?
O15 W1 O16 W4 85.9(5) . . . . ?
O11 W1 O16 W4 0.9(5) . . . . ?
O9 W4 O16 W1 173.4(6) . . . . ?
O2 W4 O16 W1 -84.3(5) . . . . ?
O18 W4 O16 W1 73.0(5) . . . . ?
O19 W4 O16 W1 -6.8(13) . . . . ?
O11 W4 O16 W1 -0.9(5) . . . . ?
O7 W3 O17 W5 130.3(9) . . . 2_755 ?
O15 W3 O17 W5 28.9(9) . . . 2_755 ?
O13 W3 O17 W5 -47.5(16) . . . 2_755 ?
O3 W3 O17 W5 -130.2(9) . . . 2_755 ?
O10 W3 O17 W5 -56.0(9) . . . 2_755 ?
O5 W6 O18 W4 173.6(6) . . . . ?
O19 W6 O18 W4 -86.1(6) 2_755 . . . ?
O12 W6 O18 W4 -7.4(14) 2_755 . . . ?
O1 W6 O18 W4 72.1(6) . . . . ?
O11 W6 O18 W4 -0.5(5) . . . . ?
O9 W4 O18 W6 -172.6(6) . . . . ?
O2 W4 O18 W6 9.8(13) . . . . ?
O16 W4 O18 W6 -72.3(6) . . . . ?
O19 W4 O18 W6 85.5(6) . . . . ?
O11 W4 O18 W6 0.5(5) . . . . ?
O9 W4 O19 W6 128.8(9) . . . 2_755 ?
O2 W4 O19 W6 27.0(9) . . . 2_755 ?
O18 W4 O19 W6 -130.7(9) . . . 2_755 ?
O16 W4 O19 W6 -51.0(15) . . . 2_755 ?
O11 W4 O19 W6 -56.7(9) . . . 2_755 ?
O8 W2 O20 W5 172.4(5) . . . . ?
O12 W2 O20 W5 -86.3(5) . . . . ?
O2 W2 O20 W5 -8.6(13) . . . . ?
O13 W2 O20 W5 71.9(5) . . . . ?
O10 W2 O20 W5 -1.3(5) . . . . ?
O4 W5 O20 W2 -172.4(6) . . . . ?
O14 W5 O20 W2 85.3(6) 2_755 . . . ?
O17 W5 O20 W2 11.8(14) 2_755 . . . ?
O3 W5 O20 W2 -72.5(6) . . . . ?
O10 W5 O20 W2 1.3(5) . . . . ?
W1 O11 Si1 O11 178.4(6) . . . 2_755 ?
W4 O11 Si1 O11 -60.6(4) . . . 2_755 ?
W6 O11 Si1 O11 59.6(4) . . . 2_755 ?
W1 O11 Si1 O10 59.4(6) . . . 2_755 ?
W4 O11 Si1 O10 -179.5(5) . . . 2_755 ?
W6 O11 Si1 O10 -59.4(7) . . . 2_755 ?
W1 O11 Si1 O10 -62.0(6) . . . . ?
W4 O11 Si1 O10 59.1(7) . . . . ?
W6 O11 Si1 O10 179.2(5) . . . . ?
W2 O10 Si1 O11 -59.6(6) . . . . ?
W5 O10 Si1 O11 179.3(5) . . . . ?
W3 O10 Si1 O11 61.3(7) . . . . ?
W2 O10 Si1 O11 59.7(6) . . . 2_755 ?
W5 O10 Si1 O11 -61.4(7) . . . 2_755 ?
W3 O10 Si1 O11 -179.4(5) . . . 2_755 ?
W2 O10 Si1 O10 179.8(6) . . . 2_755 ?
W5 O10 Si1 O10 58.6(4) . . . 2_755 ?
W3 O10 Si1 O10 -59.3(4) . . . 2_755 ?
 
_diffrn_measured_fraction_theta_max    0.997
_diffrn_reflns_theta_full              25.00
_diffrn_measured_fraction_theta_full   0.997
_refine_diff_density_max    1.366
_refine_diff_density_min   -1.332
_refine_diff_density_rms    0.250

#============================================end

 
data_5
 
_audit_creation_method            SHELXL-97
_chemical_name_systematic
;
 ?
;
_chemical_name_common             ?
_chemical_melting_point           ?
_chemical_formula_moiety          'C24 H35 Cu4 Mo12 N8 O41.50 P'
_chemical_formula_sum
 'C24 H35 Cu4 Mo12 N8 O41.50 P'
_chemical_formula_weight          2536.01
 
loop_
 _atom_type_symbol
 _atom_type_description
 _atom_type_scat_dispersion_real
 _atom_type_scat_dispersion_imag
 _atom_type_scat_source
 'C'  'C'   0.0033   0.0016
 'International Tables Vol C Tables 4.2.6.8 and 6.1.1.4'
 'H'  'H'   0.0000   0.0000
 'International Tables Vol C Tables 4.2.6.8 and 6.1.1.4'
 'N'  'N'   0.0061   0.0033
 'International Tables Vol C Tables 4.2.6.8 and 6.1.1.4'
 'O'  'O'   0.0106   0.0060
 'International Tables Vol C Tables 4.2.6.8 and 6.1.1.4'
 'P'  'P'   0.1023   0.0942
 'International Tables Vol C Tables 4.2.6.8 and 6.1.1.4'
 'Cu'  'Cu'   0.3201   1.2651
 'International Tables Vol C Tables 4.2.6.8 and 6.1.1.4'
 'Mo'  'Mo'  -1.6832   0.6857
 'International Tables Vol C Tables 4.2.6.8 and 6.1.1.4'
 
_symmetry_cell_setting            monoclinic
_symmetry_space_group_name_H-M     'C 2/c '
_symmetry_space_group_name_hall   '-C 2yc '
loop_
 _symmetry_equiv_pos_as_xyz
 'x, y, z'
 '-x, y, -z+1/2'
 'x+1/2, y+1/2, z'
 '-x+1/2, y+1/2, -z+1/2'
 '-x, -y, -z'
 'x, -y, z-1/2'
 '-x+1/2, -y+1/2, -z'
 'x+1/2, -y+1/2, z-1/2'
 
_cell_length_a                    23.4725(7)
_cell_length_b                    12.0745(3)
_cell_length_c                    23.1288(7)
_cell_angle_alpha                 90.00
_cell_angle_beta                  112.811(4)
_cell_angle_gamma                 90.00
_cell_volume                      6042.4(3)
_cell_formula_units_Z             4
_cell_measurement_temperature     293(2)
_cell_measurement_reflns_used     6164
_cell_measurement_theta_min       1.9
_cell_measurement_theta_max       26.4
 
_exptl_crystal_description        block
_exptl_crystal_colour             blacl
_exptl_crystal_size_max           0.32
_exptl_crystal_size_mid           0.12
_exptl_crystal_size_min           0.12
_exptl_crystal_density_meas       ?
_exptl_crystal_density_diffrn     2.788
_exptl_crystal_density_method     'not measured'
_exptl_crystal_F_000              4808
_exptl_absorpt_coefficient_mu     3.901
_exptl_absorpt_correction_type      multi-scan
_exptl_absorpt_correction_T_min   0.52
_exptl_absorpt_correction_T_max   0.67
_exptl_absorpt_process_details    
;
CrysAlis (Oxford Diffraction, 2006)
;  
_exptl_special_details
;
 ?
;
 
_diffrn_ambient_temperature       293(2)
_diffrn_radiation_wavelength      0.71073
_diffrn_radiation_type            MoK\a
_diffrn_radiation_source          'fine-focus sealed tube'
_diffrn_radiation_monochromator   graphite
_diffrn_measurement_device_type  'Oxford Diffraction Gemini R Ultra'
_diffrn_measurement_method        '\w scan'
_diffrn_detector_area_resol_mean  10.0
_diffrn_standards_number          ?
_diffrn_standards_interval_count  ?
_diffrn_standards_interval_time   ?
_diffrn_standards_decay_%         ?
_diffrn_reflns_number             15276
_diffrn_reflns_av_R_equivalents   0.0445
_diffrn_reflns_av_sigmaI/netI     0.0879
_diffrn_reflns_limit_h_min        -22
_diffrn_reflns_limit_h_max        29
_diffrn_reflns_limit_k_min        -14
_diffrn_reflns_limit_k_max        15
_diffrn_reflns_limit_l_min        -28
_diffrn_reflns_limit_l_max        23
_diffrn_reflns_theta_min          1.91
_diffrn_reflns_theta_max          26.37
_reflns_number_total              6164
_reflns_number_gt                 3413
_reflns_threshold_expression      >2\s(I)
 
_computing_data_collection         'CrysAlis (Oxford Diffraction, 2006)'
_computing_cell_refinement        'CrysAlis'
_computing_data_reduction         'CrysAlis'
_computing_structure_solution     'SHELXS-97 (Sheldrick, 1997)'
_computing_structure_refinement   'SHELXL-97 (Sheldrick, 2008)'
_computing_molecular_graphics     ?
_computing_publication_material   ?
 
_refine_special_details
;
 Refinement of F^2^ against ALL reflections.  The weighted R-factor wR and
 goodness of fit S are based on F^2^, conventional R-factors R are based
 on F, with F set to zero for negative F^2^. The threshold expression of
 F^2^ > 2\s(F^2^) is used only for calculating R-factors(gt) etc. and is
 not relevant to the choice of reflections for refinement.  R-factors based
 on F^2^ are statistically about twice as large as those based on F, and R-
 factors based on ALL data will be even larger.
;
 
_refine_ls_structure_factor_coef  Fsqd
_refine_ls_matrix_type            full
_refine_ls_weighting_scheme       calc
_refine_ls_weighting_details
 'calc w=1/[\s^2^(Fo^2^)+(0.0475P)^2^+0.0000P] where P=(Fo^2^+2Fc^2^)/3'
_atom_sites_solution_primary      direct
_atom_sites_solution_secondary    difmap
_atom_sites_solution_hydrogens    geom
_refine_ls_hydrogen_treatment     constr
_refine_ls_extinction_method      none
_refine_ls_extinction_coef        ?
_refine_ls_number_reflns          6164
_refine_ls_number_parameters      427
_refine_ls_number_restraints      0
_refine_ls_R_factor_all           0.0920
_refine_ls_R_factor_gt            0.0416
_refine_ls_wR_factor_ref          0.0964
_refine_ls_wR_factor_gt           0.0867
_refine_ls_goodness_of_fit_ref    0.859
_refine_ls_restrained_S_all       0.859
_refine_ls_shift/su_max           0.001
_refine_ls_shift/su_mean          0.000
 
loop_
 _atom_site_label
 _atom_site_type_symbol
 _atom_site_fract_x
 _atom_site_fract_y
 _atom_site_fract_z
 _atom_site_U_iso_or_equiv
 _atom_site_adp_type
 _atom_site_occupancy
 _atom_site_symmetry_multiplicity
 _atom_site_calc_flag
 _atom_site_refinement_flags
 _atom_site_disorder_assembly
 _atom_site_disorder_group
Cu1 Cu 0.80327(4) -0.17035(9) 0.38506(4) 0.0454(3) Uani 1 1 d . . .
Cu2 Cu 1.05729(5) -0.31258(11) 0.62271(5) 0.0621(4) Uani 1 1 d . . .
Mo1 Mo 0.61113(3) 0.14151(6) 0.38516(3) 0.03455(18) Uani 1 1 d . . .
Mo2 Mo 0.71239(3) 0.30367(6) 0.33774(3) 0.03524(18) Uani 1 1 d . . .
Mo3 Mo 0.62389(3) 0.43072(6) 0.41648(3) 0.03523(18) Uani 1 1 d . . .
Mo4 Mo 0.65034(3) 0.08234(6) 0.54704(3) 0.03937(19) Uani 1 1 d . . .
Mo5 Mo 0.73679(4) -0.03746(6) 0.46809(3) 0.0409(2) Uani 1 1 d . . .
Mo6 Mo 0.66096(3) 0.37366(6) 0.57818(3) 0.04050(19) Uani 1 1 d . . .
C1 C 0.8778(4) -0.2371(7) 0.5068(3) 0.044(2) Uani 1 1 d . . .
H1 H 0.8403 -0.2318 0.5115 0.053 Uiso 1 1 calc R . .
C2 C 0.9296(4) -0.2675(6) 0.5579(3) 0.0375(19) Uani 1 1 d . . .
C3 C 0.9278(4) -0.2883(7) 0.6213(3) 0.055(2) Uani 1 1 d . . .
H3A H 0.9682 -0.3096 0.6504 0.082 Uiso 1 1 calc R . .
H3B H 0.8989 -0.3466 0.6181 0.082 Uiso 1 1 calc R . .
H3C H 0.9151 -0.2220 0.6359 0.082 Uiso 1 1 calc R . .
C4 C 0.9838(4) -0.2560(7) 0.4946(4) 0.048(2) Uani 1 1 d . . .
H4 H 1.0207 -0.2645 0.4892 0.058 Uiso 1 1 calc R . .
C5 C 0.9327(4) -0.2225(7) 0.4439(3) 0.042(2) Uani 1 1 d . . .
C6 C 0.9364(4) -0.1948(8) 0.3832(3) 0.059(3) Uani 1 1 d . . .
H6A H 0.8963 -0.1731 0.3537 0.088 Uiso 1 1 calc R . .
H6B H 0.9503 -0.2584 0.3674 0.088 Uiso 1 1 calc R . .
H6C H 0.9650 -0.1349 0.3890 0.088 Uiso 1 1 calc R . .
C7 C 1.1071(4) -0.5284(8) 0.7083(4) 0.068(3) Uani 1 1 d . . .
H7A H 1.0717 -0.5113 0.6711 0.101 Uiso 1 1 calc R . .
H7B H 1.0938 -0.5606 0.7390 0.101 Uiso 1 1 calc R . .
H7C H 1.1331 -0.5798 0.6984 0.101 Uiso 1 1 calc R . .
C8 C 1.1423(3) -0.4251(7) 0.7341(3) 0.040(2) Uani 1 1 d . . .
C9 C 1.1956(3) -0.4232(7) 0.7884(3) 0.040(2) Uani 1 1 d . . .
H9 H 1.2102 -0.4900 0.8089 0.048 Uiso 1 1 calc R . .
C10 C 1.2028(4) -0.2353(7) 0.7853(3) 0.039(2) Uani 1 1 d . . .
C11 C 1.2345(5) -0.1292(8) 0.8136(4) 0.078(3) Uani 1 1 d . . .
H11A H 1.2706 -0.1452 0.8504 0.117 Uiso 1 1 calc R . .
H11B H 1.2068 -0.0837 0.8248 0.117 Uiso 1 1 calc R . .
H11C H 1.2463 -0.0907 0.7836 0.117 Uiso 1 1 calc R . .
C12 C 1.1498(4) -0.2347(8) 0.7313(4) 0.054(2) Uani 1 1 d . . .
H12 H 1.1340 -0.1673 0.7123 0.065 Uiso 1 1 calc R . .
N1 N 0.8792(3) -0.2149(5) 0.4512(3) 0.0348(15) Uani 1 1 d . . .
N2 N 0.9837(3) -0.2771(5) 0.5516(3) 0.0450(17) Uani 1 1 d . . .
N3 N 1.1205(3) -0.3290(7) 0.7053(3) 0.0476(18) Uani 1 1 d . . .
N4 N 1.2271(3) -0.3313(5) 0.8130(2) 0.0330(15) Uani 1 1 d . . .
O1 O 0.7961(4) 0.3505(7) 0.5200(3) 0.024(2) Uani 0.50 1 d P . .
O2 O 0.7875(4) 0.1467(7) 0.4973(4) 0.027(2) Uani 0.50 1 d P . .
O3 O 0.7744(4) 0.2660(7) 0.4473(4) 0.028(2) Uani 0.50 1 d P . .
O4 O 0.6990(4) 0.2743(7) 0.4391(4) 0.024(2) Uani 0.50 1 d P . .
O5 O 0.7701(3) 0.1878(5) 0.3525(3) 0.075(2) Uani 1 1 d . . .
O6 O 0.7790(3) 0.4018(5) 0.3771(3) 0.081(2) Uani 1 1 d . . .
O7 O 0.6937(3) 0.3321(5) 0.2625(2) 0.0584(18) Uani 1 1 d . . .
O8 O 0.6610(3) 0.4110(5) 0.3570(3) 0.0580(17) Uani 1 1 d . . .
O9 O 0.5869(3) 0.2894(4) 0.3923(3) 0.0552(16) Uani 1 1 d . . .
O10 O 0.5647(3) 0.5143(5) 0.3782(3) 0.0685(19) Uani 1 1 d . . .
O11 O 0.6884(3) 0.5316(5) 0.4594(2) 0.070(2) Uani 1 1 d . . .
O12 O 0.6522(3) 0.1973(4) 0.3349(3) 0.0589(17) Uani 1 1 d . . .
O13 O 0.6138(3) 0.4082(6) 0.4949(2) 0.079(2) Uani 1 1 d . . .
O14 O 0.6196(3) 0.4318(5) 0.6140(2) 0.0599(17) Uani 1 1 d . . .
O15 O 0.6275(3) 0.2293(5) 0.5638(3) 0.070(2) Uani 1 1 d . . .
O16 O 0.6019(3) 0.1078(6) 0.4613(3) 0.087(3) Uani 1 1 d . . .
O17 O 0.6941(3) -0.0270(6) 0.5224(2) 0.076(2) Uani 1 1 d . . .
O18 O 0.6665(3) 0.0183(6) 0.4029(3) 0.084(2) Uani 1 1 d . . .
O19 O 0.7320(2) -0.1718(4) 0.4499(2) 0.0369(13) Uani 1 1 d . . .
O20 O 0.7843(3) 0.0090(5) 0.4206(2) 0.0657(19) Uani 1 1 d . . .
O21 O 0.5470(3) 0.0892(5) 0.3325(3) 0.0616(17) Uani 1 1 d . . .
O22 O 0.6032(3) 0.0072(4) 0.5685(2) 0.0487(15) Uani 1 1 d . . .
P1 P 0.7500 0.2500 0.5000 0.0197(5) Uani 1 2 d S . .
O1W O 1.0556(9) -0.0370(16) 0.7368(8) 0.133(7) Uiso 0.50 1 d P . .
O2W O 1.0000 0.160(3) 0.7500 0.151(11) Uiso 0.50 2 d SP . .
 
loop_
 _atom_site_aniso_label
 _atom_site_aniso_U_11
 _atom_site_aniso_U_22
 _atom_site_aniso_U_33
 _atom_site_aniso_U_23
 _atom_site_aniso_U_13
 _atom_site_aniso_U_12
Cu1 0.0263(5) 0.0601(7) 0.0349(5) 0.0025(5) -0.0043(4) 0.0105(5)
Cu2 0.0304(6) 0.0982(10) 0.0383(5) 0.0146(6) -0.0078(5) 0.0069(6)
Mo1 0.0251(4) 0.0397(4) 0.0301(3) -0.0007(3) 0.0011(3) 0.0012(3)
Mo2 0.0306(4) 0.0433(4) 0.0260(3) 0.0031(3) 0.0047(3) 0.0016(3)
Mo3 0.0287(4) 0.0362(4) 0.0317(3) 0.0012(3) 0.0018(3) 0.0042(3)
Mo4 0.0333(4) 0.0364(4) 0.0551(4) 0.0110(3) 0.0244(4) 0.0039(3)
Mo5 0.0602(5) 0.0268(4) 0.0408(4) 0.0001(3) 0.0253(4) 0.0030(4)
Mo6 0.0366(4) 0.0389(4) 0.0546(4) -0.0116(4) 0.0272(4) -0.0054(4)
C1 0.029(5) 0.052(5) 0.046(5) 0.010(4) 0.007(4) 0.005(4)
C2 0.027(4) 0.032(4) 0.051(5) 0.007(4) 0.013(4) 0.003(4)
C3 0.047(6) 0.063(6) 0.052(5) 0.027(4) 0.016(4) 0.008(5)
C4 0.024(4) 0.071(6) 0.045(5) -0.003(5) 0.008(4) 0.003(5)
C5 0.026(4) 0.051(5) 0.040(4) -0.004(4) 0.004(4) 0.003(4)
C6 0.037(5) 0.094(8) 0.035(4) 0.002(5) 0.004(4) 0.011(5)
C7 0.056(6) 0.084(7) 0.045(5) 0.006(5) -0.001(4) -0.030(6)
C8 0.026(4) 0.060(6) 0.025(4) 0.011(4) 0.000(3) -0.006(4)
C9 0.028(4) 0.051(5) 0.033(4) 0.005(4) 0.004(3) -0.011(4)
C10 0.050(5) 0.044(5) 0.020(4) -0.001(4) 0.010(4) 0.000(4)
C11 0.092(9) 0.060(7) 0.065(6) 0.000(5) 0.013(6) 0.002(6)
C12 0.046(6) 0.065(6) 0.042(5) 0.021(5) 0.006(4) 0.015(5)
N1 0.021(3) 0.040(4) 0.033(3) 0.003(3) -0.001(3) 0.001(3)
N2 0.029(4) 0.050(4) 0.047(4) 0.003(3) 0.004(3) 0.000(4)
N3 0.030(4) 0.076(6) 0.030(3) 0.010(4) 0.005(3) 0.004(4)
N4 0.033(4) 0.039(4) 0.022(3) 0.003(3) 0.005(3) -0.007(3)
O1 0.022(5) 0.028(5) 0.019(4) -0.001(4) 0.005(4) -0.005(4)
O2 0.020(5) 0.029(5) 0.026(5) 0.000(4) 0.005(4) 0.006(5)
O3 0.013(5) 0.023(5) 0.039(5) 0.001(4) 0.001(4) 0.003(4)
O4 0.015(5) 0.024(5) 0.022(4) 0.009(4) -0.004(4) 0.011(4)
O5 0.029(3) 0.037(3) 0.125(5) 0.002(4) -0.007(4) 0.004(3)
O6 0.037(4) 0.035(4) 0.121(5) 0.003(3) -0.023(4) 0.008(3)
O7 0.094(5) 0.059(4) 0.033(3) 0.007(3) 0.036(3) 0.009(4)
O8 0.067(4) 0.048(4) 0.084(4) -0.023(3) 0.057(4) -0.014(3)
O9 0.066(4) 0.039(3) 0.085(4) -0.015(3) 0.055(4) -0.011(3)
O10 0.040(4) 0.055(4) 0.110(5) 0.030(4) 0.029(4) 0.026(3)
O11 0.090(5) 0.082(5) 0.031(3) -0.008(3) 0.016(3) -0.056(4)
O12 0.075(5) 0.042(3) 0.085(4) -0.016(3) 0.058(4) -0.014(3)
O13 0.084(5) 0.116(6) 0.030(3) -0.017(3) 0.014(3) -0.071(5)
O14 0.053(4) 0.078(4) 0.049(3) -0.003(3) 0.019(3) 0.029(4)
O15 0.029(3) 0.035(3) 0.108(5) -0.002(3) -0.015(3) 0.006(3)
O16 0.098(5) 0.124(6) 0.049(3) 0.045(4) 0.039(4) 0.083(5)
O17 0.089(5) 0.100(5) 0.050(3) 0.045(4) 0.038(3) 0.072(5)
O18 0.101(6) 0.115(6) 0.058(4) 0.042(4) 0.054(4) 0.083(5)
O19 0.046(3) 0.024(3) 0.036(3) -0.002(2) 0.010(2) 0.001(3)
O20 0.071(4) 0.085(5) 0.034(3) 0.000(3) 0.013(3) -0.051(4)
O21 0.038(3) 0.083(5) 0.060(4) -0.034(3) 0.014(3) -0.019(3)
O22 0.041(3) 0.051(4) 0.053(3) 0.016(3) 0.016(3) -0.009(3)
P1 0.0161(12) 0.0196(13) 0.0223(12) 0.0016(11) 0.0062(10) 0.0003(11)
 
_geom_special_details
;
 All s.u.'s (except the s.u. in the dihedral angle between two l.s. planes)
 are estimated using the full covariance matrix.  The cell s.u.'s are taken
 into account individually in the estimation of s.u.'s in distances, angles
 and torsion angles; correlations between s.u.'s in cell parameters are only
 used when they are defined by crystal symmetry.  An approximate (isotropic)
 treatment of cell s.u.'s is used for estimating s.u.'s involving l.s. planes.
;
 
loop_
 _geom_bond_atom_site_label_1
 _geom_bond_atom_site_label_2
 _geom_bond_distance
 _geom_bond_site_symmetry_2
 _geom_bond_publ_flag
Cu1 N4 1.914(6) 8_445 ?
Cu1 N1 1.922(6) . ?
Cu1 O20 2.418(7) . ?
Cu2 N2 1.916(6) . ?
Cu2 N3 1.921(6) . ?
Mo1 O21 1.651(5) . ?
Mo1 O12 1.898(5) . ?
Mo1 O16 1.900(6) . ?
Mo1 O9 1.901(5) . ?
Mo1 O18 1.912(6) . ?
Mo1 O1 2.421(8) 7_656 ?
Mo2 O7 1.657(5) . ?
Mo2 O5 1.884(6) . ?
Mo2 O6 1.891(6) . ?
Mo2 O12 1.891(6) . ?
Mo2 O8 1.936(5) . ?
Mo2 O3 2.427(8) . ?
Mo2 O4 2.507(8) . ?
Mo3 O10 1.667(5) . ?
Mo3 O11 1.897(6) . ?
Mo3 O9 1.897(5) . ?
Mo3 O8 1.907(5) . ?
Mo3 O13 1.936(5) . ?
Mo3 O2 2.441(8) 7_656 ?
Mo3 O4 2.497(8) . ?
Mo4 O22 1.649(5) . ?
Mo4 O16 1.889(5) . ?
Mo4 O17 1.890(6) . ?
Mo4 O6 1.899(6) 7_656 ?
Mo4 O15 1.936(6) . ?
Mo4 O1 2.481(8) 7_656 ?
Mo4 O3 2.512(9) 7_656 ?
Mo5 O19 1.669(5) . ?
Mo5 O18 1.877(6) . ?
Mo5 O17 1.892(6) . ?
Mo5 O11 1.901(6) 7_656 ?
Mo5 O20 1.927(5) . ?
Mo5 O1 2.436(9) 7_656 ?
Mo5 O2 2.489(9) . ?
Mo6 O14 1.657(5) . ?
Mo6 O13 1.860(5) . ?
Mo6 O15 1.888(6) . ?
Mo6 O20 1.906(5) 7_656 ?
Mo6 O5 1.931(6) 7_656 ?
Mo6 O3 2.488(9) 7_656 ?
Mo6 O2 2.492(9) 7_656 ?
C1 N1 1.326(9) . ?
C1 C2 1.376(10) . ?
C2 N2 1.336(10) . ?
C2 C3 1.506(10) . ?
C4 N2 1.343(9) . ?
C4 C5 1.372(10) . ?
C5 N1 1.334(10) . ?
C5 C6 1.479(10) . ?
C7 C8 1.487(11) . ?
C8 N3 1.337(10) . ?
C8 C9 1.388(10) . ?
C9 N4 1.332(9) . ?
C10 N4 1.340(9) . ?
C10 C12 1.380(11) . ?
C10 C11 1.498(12) . ?
C12 N3 1.346(11) . ?
N4 Cu1 1.914(6) 8_546 ?
O1 P1 1.571(8) . ?
O1 O4 1.759(11) 7_656 ?
O1 Mo1 2.421(8) 7_656 ?
O1 Mo5 2.436(9) 7_656 ?
O1 Mo4 2.481(8) 7_656 ?
O2 P1 1.542(9) . ?
O2 O4 1.678(12) 7_656 ?
O2 O3 1.797(12) . ?
O2 Mo3 2.441(8) 7_656 ?
O2 Mo6 2.492(9) 7_656 ?
O3 P1 1.546(9) . ?
O3 O4 1.707(12) . ?
O3 Mo6 2.488(9) 7_656 ?
O3 Mo4 2.512(9) 7_656 ?
O4 P1 1.482(7) . ?
O4 O2 1.678(12) 7_656 ?
O4 O1 1.759(11) 7_656 ?
O5 Mo6 1.931(6) 7_656 ?
O6 Mo4 1.899(6) 7_656 ?
O11 Mo5 1.901(6) 7_656 ?
O20 Mo6 1.906(5) 7_656 ?
P1 O4 1.482(7) 7_656 ?
P1 O2 1.542(9) 7_656 ?
P1 O3 1.546(9) 7_656 ?
P1 O1 1.571(9) 7_656 ?
 
loop_
 _geom_angle_atom_site_label_1
 _geom_angle_atom_site_label_2
 _geom_angle_atom_site_label_3
 _geom_angle
 _geom_angle_site_symmetry_1
 _geom_angle_site_symmetry_3
 _geom_angle_publ_flag
N4 Cu1 N1 164.0(3) 8_445 . ?
N4 Cu1 O20 93.1(2) 8_445 . ?
N1 Cu1 O20 102.5(2) . . ?
N2 Cu2 N3 165.5(3) . . ?
O21 Mo1 O12 102.7(3) . . ?
O21 Mo1 O16 101.7(3) . . ?
O12 Mo1 O16 155.7(3) . . ?
O21 Mo1 O9 101.8(3) . . ?
O12 Mo1 O9 87.7(2) . . ?
O16 Mo1 O9 88.6(3) . . ?
O21 Mo1 O18 102.1(3) . . ?
O12 Mo1 O18 86.7(3) . . ?
O16 Mo1 O18 87.0(2) . . ?
O9 Mo1 O18 156.0(3) . . ?
O21 Mo1 O1 157.9(3) . 7_656 ?
O12 Mo1 O1 92.8(3) . 7_656 ?
O16 Mo1 O1 63.5(3) . 7_656 ?
O9 Mo1 O1 94.5(3) . 7_656 ?
O18 Mo1 O1 62.6(3) . 7_656 ?
O7 Mo2 O5 102.9(3) . . ?
O7 Mo2 O6 102.0(3) . . ?
O5 Mo2 O6 88.6(3) . . ?
O7 Mo2 O12 102.4(3) . . ?
O5 Mo2 O12 88.6(3) . . ?
O6 Mo2 O12 155.4(3) . . ?
O7 Mo2 O8 99.7(3) . . ?
O5 Mo2 O8 157.4(3) . . ?
O6 Mo2 O8 86.7(3) . . ?
O12 Mo2 O8 86.5(2) . . ?
O7 Mo2 O3 160.5(3) . . ?
O5 Mo2 O3 64.7(3) . . ?
O6 Mo2 O3 64.2(3) . . ?
O12 Mo2 O3 92.7(3) . . ?
O8 Mo2 O3 93.4(3) . . ?
O7 Mo2 O4 158.8(3) . . ?
O5 Mo2 O4 93.8(3) . . ?
O6 Mo2 O4 91.1(3) . . ?
O12 Mo2 O4 64.8(3) . . ?
O8 Mo2 O4 64.2(3) . . ?
O3 Mo2 O4 40.4(3) . . ?
O10 Mo3 O11 102.8(3) . . ?
O10 Mo3 O9 101.3(3) . . ?
O11 Mo3 O9 155.9(3) . . ?
O10 Mo3 O8 102.3(3) . . ?
O11 Mo3 O8 87.8(3) . . ?
O9 Mo3 O8 87.7(2) . . ?
O10 Mo3 O13 101.7(3) . . ?
O11 Mo3 O13 87.9(2) . . ?
O9 Mo3 O13 86.6(2) . . ?
O8 Mo3 O13 156.0(3) . . ?
O10 Mo3 O2 159.4(3) . 7_656 ?
O11 Mo3 O2 64.1(3) . 7_656 ?
O9 Mo3 O2 92.5(3) . 7_656 ?
O8 Mo3 O2 93.4(3) . 7_656 ?
O13 Mo3 O2 63.6(3) . 7_656 ?
O10 Mo3 O4 160.8(3) . . ?
O11 Mo3 O4 91.2(3) . . ?
O9 Mo3 O4 65.6(3) . . ?
O8 Mo3 O4 64.7(3) . . ?
O13 Mo3 O4 91.7(3) . . ?
O2 Mo3 O4 39.7(3) 7_656 . ?
O22 Mo4 O16 101.8(3) . . ?
O22 Mo4 O17 102.3(3) . . ?
O16 Mo4 O17 88.5(2) . . ?
O22 Mo4 O6 103.0(3) . 7_656 ?
O16 Mo4 O6 155.2(3) . 7_656 ?
O17 Mo4 O6 88.1(3) . 7_656 ?
O22 Mo4 O15 100.0(3) . . ?
O16 Mo4 O15 87.7(3) . . ?
O17 Mo4 O15 157.7(3) . . ?
O6 Mo4 O15 86.2(2) 7_656 . ?
O22 Mo4 O1 158.4(3) . 7_656 ?
O16 Mo4 O1 62.3(3) . 7_656 ?
O17 Mo4 O1 64.8(3) . 7_656 ?
O6 Mo4 O1 94.1(3) 7_656 7_656 ?
O15 Mo4 O1 94.1(3) . 7_656 ?
O22 Mo4 O3 157.8(3) . 7_656 ?
O16 Mo4 O3 93.5(3) . 7_656 ?
O17 Mo4 O3 94.1(3) . 7_656 ?
O6 Mo4 O3 62.2(3) 7_656 7_656 ?
O15 Mo4 O3 64.2(3) . 7_656 ?
O1 Mo4 O3 43.7(3) 7_656 7_656 ?
O19 Mo5 O18 101.2(3) . . ?
O19 Mo5 O17 103.3(3) . . ?
O18 Mo5 O17 89.0(2) . . ?
O19 Mo5 O11 102.0(3) . 7_656 ?
O18 Mo5 O11 156.8(3) . 7_656 ?
O17 Mo5 O11 87.6(3) . 7_656 ?
O19 Mo5 O20 97.9(3) . . ?
O18 Mo5 O20 87.7(3) . . ?
O17 Mo5 O20 158.8(3) . . ?
O11 Mo5 O20 87.2(2) 7_656 . ?
O19 Mo5 O1 159.4(3) . 7_656 ?
O18 Mo5 O1 62.6(3) . 7_656 ?
O17 Mo5 O1 65.8(3) . 7_656 ?
O11 Mo5 O1 95.2(3) 7_656 7_656 ?
O20 Mo5 O1 94.2(3) . 7_656 ?
O19 Mo5 O2 156.3(3) . . ?
O18 Mo5 O2 94.4(3) . . ?
O17 Mo5 O2 94.6(3) . . ?
O11 Mo5 O2 63.0(3) 7_656 . ?
O20 Mo5 O2 64.7(3) . . ?
O1 Mo5 O2 44.0(3) 7_656 . ?
O14 Mo6 O13 101.2(3) . . ?
O14 Mo6 O15 101.2(3) . . ?
O13 Mo6 O15 89.1(3) . . ?
O14 Mo6 O20 101.5(3) . 7_656 ?
O13 Mo6 O20 88.6(2) . 7_656 ?
O15 Mo6 O20 157.1(3) . 7_656 ?
O14 Mo6 O5 102.3(3) . 7_656 ?
O13 Mo6 O5 156.4(3) . 7_656 ?
O15 Mo6 O5 87.1(2) . 7_656 ?
O20 Mo6 O5 86.0(3) 7_656 7_656 ?
O14 Mo6 O3 159.3(3) . 7_656 ?
O13 Mo6 O3 94.5(3) . 7_656 ?
O15 Mo6 O3 65.3(3) . 7_656 ?
O20 Mo6 O3 92.2(3) 7_656 7_656 ?
O5 Mo6 O3 62.9(3) 7_656 7_656 ?
O14 Mo6 O2 158.4(3) . 7_656 ?
O13 Mo6 O2 63.3(3) . 7_656 ?
O15 Mo6 O2 93.8(3) . 7_656 ?
O20 Mo6 O2 64.9(3) 7_656 7_656 ?
O5 Mo6 O2 93.7(3) 7_656 7_656 ?
O3 Mo6 O2 42.3(3) 7_656 7_656 ?
N1 C1 C2 122.7(8) . . ?
N2 C2 C1 119.4(7) . . ?
N2 C2 C3 118.5(7) . . ?
C1 C2 C3 122.1(7) . . ?
N2 C4 C5 124.2(8) . . ?
N1 C5 C4 117.7(7) . . ?
N1 C5 C6 120.6(7) . . ?
C4 C5 C6 121.7(8) . . ?
N3 C8 C9 118.3(7) . . ?
N3 C8 C7 118.8(7) . . ?
C9 C8 C7 122.8(8) . . ?
N4 C9 C8 123.8(7) . . ?
N4 C10 C12 120.3(8) . . ?
N4 C10 C11 118.9(7) . . ?
C12 C10 C11 120.7(8) . . ?
N3 C12 C10 121.7(8) . . ?
C1 N1 C5 119.2(6) . . ?
C1 N1 Cu1 117.7(5) . . ?
C5 N1 Cu1 123.1(5) . . ?
C2 N2 C4 116.9(7) . . ?
C2 N2 Cu2 120.3(5) . . ?
C4 N2 Cu2 122.7(6) . . ?
C8 N3 C12 118.7(6) . . ?
C8 N3 Cu2 125.7(6) . . ?
C12 N3 Cu2 114.9(6) . . ?
C9 N4 C10 117.0(6) . . ?
C9 N4 Cu1 123.8(5) . 8_546 ?
C10 N4 Cu1 119.2(5) . 8_546 ?
P1 O1 O4 52.5(4) . 7_656 ?
P1 O1 Mo1 124.9(4) . 7_656 ?
O4 O1 Mo1 72.4(4) 7_656 7_656 ?
P1 O1 Mo5 122.5(5) . 7_656 ?
O4 O1 Mo5 133.6(5) 7_656 7_656 ?
Mo1 O1 Mo5 94.2(3) 7_656 7_656 ?
P1 O1 Mo4 121.8(4) . 7_656 ?
O4 O1 Mo4 132.3(5) 7_656 7_656 ?
Mo1 O1 Mo4 93.3(3) 7_656 7_656 ?
Mo5 O1 Mo4 91.5(3) 7_656 7_656 ?
P1 O2 O4 54.6(4) . 7_656 ?
P1 O2 O3 54.5(4) . . ?
O4 O2 O3 92.1(6) 7_656 . ?
P1 O2 Mo3 126.6(4) . 7_656 ?
O4 O2 Mo3 71.9(4) 7_656 7_656 ?
O3 O2 Mo3 135.4(5) . 7_656 ?
P1 O2 Mo5 120.9(5) . . ?
O4 O2 Mo5 130.8(6) 7_656 . ?
O3 O2 Mo5 126.6(5) . . ?
Mo3 O2 Mo5 92.6(3) 7_656 . ?
P1 O2 Mo6 123.3(5) . 7_656 ?
O4 O2 Mo6 133.9(6) 7_656 7_656 ?
O3 O2 Mo6 68.7(4) . 7_656 ?
Mo3 O2 Mo6 92.5(3) 7_656 7_656 ?
Mo5 O2 Mo6 91.9(3) . 7_656 ?
P1 O3 O4 53.9(4) . . ?
P1 O3 O2 54.3(4) . . ?
O4 O3 O2 91.8(6) . . ?
P1 O3 Mo2 126.2(5) . . ?
O4 O3 Mo2 72.3(4) . . ?
O2 O3 Mo2 134.9(5) . . ?
P1 O3 Mo6 123.3(5) . 7_656 ?
O4 O3 Mo6 135.6(5) . 7_656 ?
O2 O3 Mo6 69.0(4) . 7_656 ?
Mo2 O3 Mo6 93.1(3) . 7_656 ?
P1 O3 Mo4 121.2(4) . 7_656 ?
O4 O3 Mo4 129.8(5) . 7_656 ?
O2 O3 Mo4 127.5(5) . 7_656 ?
Mo2 O3 Mo4 92.4(3) . 7_656 ?
Mo6 O3 Mo4 91.4(3) 7_656 7_656 ?
P1 O4 O2 58.0(4) . 7_656 ?
P1 O4 O3 57.5(4) . . ?
O2 O4 O3 95.8(6) 7_656 . ?
P1 O4 O1 57.2(4) . 7_656 ?
O2 O4 O1 93.6(6) 7_656 7_656 ?
O3 O4 O1 92.3(6) . 7_656 ?
P1 O4 Mo3 126.4(5) . . ?
O2 O4 Mo3 68.4(4) 7_656 . ?
O3 O4 Mo3 133.2(5) . . ?
O1 O4 Mo3 130.8(5) 7_656 . ?
P1 O4 Mo2 124.7(5) . . ?
O2 O4 Mo2 133.7(6) 7_656 . ?
O3 O4 Mo2 67.2(4) . . ?
O1 O4 Mo2 128.2(5) 7_656 . ?
Mo3 O4 Mo2 91.8(3) . . ?
Mo2 O5 Mo6 138.5(4) . 7_656 ?
Mo2 O6 Mo4 140.4(4) . 7_656 ?
Mo3 O8 Mo2 138.5(3) . . ?
Mo3 O9 Mo1 138.8(3) . . ?
Mo3 O11 Mo5 139.7(3) . 7_656 ?
Mo2 O12 Mo1 140.3(3) . . ?
Mo6 O13 Mo3 139.7(4) . . ?
Mo6 O15 Mo4 138.8(4) . . ?
Mo4 O16 Mo1 140.3(4) . . ?
Mo4 O17 Mo5 137.4(4) . . ?
Mo5 O18 Mo1 139.8(4) . . ?
Mo6 O20 Mo5 138.0(3) 7_656 . ?
Mo6 O20 Cu1 117.3(3) 7_656 . ?
Mo5 O20 Cu1 99.0(2) . . ?
O4 P1 O4 180.0(5) . 7_656 ?
O4 P1 O2 67.4(4) . 7_656 ?
O4 P1 O2 112.6(4) 7_656 7_656 ?
O4 P1 O2 112.6(4) . . ?
O4 P1 O2 67.4(4) 7_656 . ?
O2 P1 O2 180.0(6) 7_656 . ?
O4 P1 O3 111.4(5) . 7_656 ?
O4 P1 O3 68.6(4) 7_656 7_656 ?
O2 P1 O3 71.2(4) 7_656 7_656 ?
O2 P1 O3 108.8(4) . 7_656 ?
O4 P1 O3 68.6(4) . . ?
O4 P1 O3 111.4(5) 7_656 . ?
O2 P1 O3 108.8(4) 7_656 . ?
O2 P1 O3 71.2(4) . . ?
O3 P1 O3 180.000(2) 7_656 . ?
O4 P1 O1 70.3(4) . 7_656 ?
O4 P1 O1 109.7(4) 7_656 7_656 ?
O2 P1 O1 107.3(5) 7_656 7_656 ?
O2 P1 O1 72.7(5) . 7_656 ?
O3 P1 O1 73.3(4) 7_656 7_656 ?
O3 P1 O1 106.7(4) . 7_656 ?
O4 P1 O1 109.7(4) . . ?
O4 P1 O1 70.3(4) 7_656 . ?
O2 P1 O1 72.7(5) 7_656 . ?
O2 P1 O1 107.3(5) . . ?
O3 P1 O1 106.7(4) 7_656 . ?
O3 P1 O1 73.3(4) . . ?
O1 P1 O1 180.0(6) 7_656 . ?
 
_diffrn_measured_fraction_theta_max    0.998
_diffrn_reflns_theta_full              25.00
_diffrn_measured_fraction_theta_full   0.999
_refine_diff_density_max    0.966
_refine_diff_density_min   -0.832
_refine_diff_density_rms    0.161

#================================================end
 
data_6
 
_audit_creation_method            SHELXL-97
_chemical_name_systematic
;
 ?
;
_chemical_name_common             ?
_chemical_melting_point           ?
_chemical_formula_moiety           'C28 H40 Cu3 Mo12 N8 O41 P'
_chemical_formula_sum
 'C28 H40 Cu3 Mo12 N8 O41 P'
_chemical_formula_weight          2517.55
 
loop_
 _atom_type_symbol
 _atom_type_description
 _atom_type_scat_dispersion_real
 _atom_type_scat_dispersion_imag
 _atom_type_scat_source
 'C'  'C'   0.0033   0.0016
 'International Tables Vol C Tables 4.2.6.8 and 6.1.1.4'
 'H'  'H'   0.0000   0.0000
 'International Tables Vol C Tables 4.2.6.8 and 6.1.1.4'
 'N'  'N'   0.0061   0.0033
 'International Tables Vol C Tables 4.2.6.8 and 6.1.1.4'
 'O'  'O'   0.0106   0.0060
 'International Tables Vol C Tables 4.2.6.8 and 6.1.1.4'
 'P'  'P'   0.1023   0.0942
 'International Tables Vol C Tables 4.2.6.8 and 6.1.1.4'
 'Cu'  'Cu'   0.3201   1.2651
 'International Tables Vol C Tables 4.2.6.8 and 6.1.1.4'
 'Mo'  'Mo'  -1.6832   0.6857
 'International Tables Vol C Tables 4.2.6.8 and 6.1.1.4'
 
_symmetry_cell_setting            Orthorhombic
_symmetry_space_group_name_H-M     'P n m a'
_symmetry_space_group_name_hall   '-P 2ac 2n'
 
loop_
 _symmetry_equiv_pos_as_xyz
 'x, y, z'
 '-x+1/2, -y, z+1/2'
 'x+1/2, -y+1/2, -z+1/2'
 '-x, y+1/2, -z'
 '-x, -y, -z'
 'x-1/2, y, -z-1/2'
 '-x-1/2, y-1/2, z-1/2'
 'x, -y-1/2, z'
 
_cell_length_a                    17.592(5)
_cell_length_b                    22.091(5)
_cell_length_c                    15.733(5)
_cell_angle_alpha                 90.000(5)
_cell_angle_beta                  90.000(5)
_cell_angle_gamma                 90.000(5)
_cell_volume                      6114(3)
_cell_formula_units_Z             4
_cell_measurement_temperature     293(2)
_cell_measurement_reflns_used     5759
_cell_measurement_theta_min       1.7
_cell_measurement_theta_max       25.4
 
_exptl_crystal_description        block
_exptl_crystal_colour             black
_exptl_crystal_size_max           0.20
_exptl_crystal_size_mid           0.14
_exptl_crystal_size_min           0.12
_exptl_crystal_density_meas       ?
_exptl_crystal_density_diffrn     2.735
_exptl_crystal_density_method     'not measured'
_exptl_crystal_F_000              4792
_exptl_absorpt_coefficient_mu     3.519
_exptl_absorpt_correction_type     multi-scan
_exptl_absorpt_correction_T_min   0.48
_exptl_absorpt_correction_T_max   0.62
_exptl_absorpt_process_details    
;
CrysAlis (Oxford Diffraction, 2006)
; 
_exptl_special_details
;
 ?
;
 
_diffrn_ambient_temperature       293(2)
_diffrn_radiation_wavelength      0.71069
_diffrn_radiation_type            MoK\a
_diffrn_radiation_source          'fine-focus sealed tube'
_diffrn_radiation_monochromator   graphite
_diffrn_measurement_device_type   'Oxford Diffraction Gemini R Ultra'
_diffrn_measurement_method        '\w scan'
_diffrn_detector_area_resol_mean  ?
_diffrn_standards_number          ?
_diffrn_standards_interval_count  ?
_diffrn_standards_interval_time   ?
_diffrn_standards_decay_%         ?
_diffrn_reflns_number             27269
_diffrn_reflns_av_R_equivalents   0.0591
_diffrn_reflns_av_sigmaI/netI     0.0660
_diffrn_reflns_limit_h_min        -21
_diffrn_reflns_limit_h_max        17
_diffrn_reflns_limit_k_min        -26
_diffrn_reflns_limit_k_max        20
_diffrn_reflns_limit_l_min        -18
_diffrn_reflns_limit_l_max        18
_diffrn_reflns_theta_min          1.74
_diffrn_reflns_theta_max          25.36
_reflns_number_total              5759
_reflns_number_gt                 3620
_reflns_threshold_expression      >2\s(I)
 
_computing_data_collection        'CrysAlis (Oxford Diffraction, 2006)'
_computing_cell_refinement         'CrysAlis'
_computing_data_reduction         'CrysAlis'
_computing_structure_solution     'SHELXS-97 (Sheldrick, 1997)'
_computing_structure_refinement   'SHELXL-97 (Sheldrick, 2008)'
_computing_molecular_graphics     ?
_computing_publication_material   ?
 
_refine_special_details
;
 Refinement of F^2^ against ALL reflections.  The weighted R-factor wR and
 goodness of fit S are based on F^2^, conventional R-factors R are based
 on F, with F set to zero for negative F^2^. The threshold expression of
 F^2^ > 2\s(F^2^) is used only for calculating R-factors(gt) etc. and is
 not relevant to the choice of reflections for refinement.  R-factors based
 on F^2^ are statistically about twice as large as those based on F, and R-
 factors based on ALL data will be even larger.
;
 
_refine_ls_structure_factor_coef  Fsqd
_refine_ls_matrix_type            full
_refine_ls_weighting_scheme       calc
_refine_ls_weighting_details
 'calc w=1/[\s^2^(Fo^2^)+(0.0001P)^2^+227.9639P] where P=(Fo^2^+2Fc^2^)/3'
_atom_sites_solution_primary      direct
_atom_sites_solution_secondary    difmap
_atom_sites_solution_hydrogens    geom
_refine_ls_hydrogen_treatment     mixed
_refine_ls_extinction_method      none
_refine_ls_extinction_coef        ?
_refine_ls_number_reflns          5759
_refine_ls_number_parameters      471
_refine_ls_number_restraints      10
_refine_ls_R_factor_all           0.1250
_refine_ls_R_factor_gt            0.0835
_refine_ls_wR_factor_ref          0.1777
_refine_ls_wR_factor_gt           0.1684
_refine_ls_goodness_of_fit_ref    1.155
_refine_ls_restrained_S_all       1.154
_refine_ls_shift/su_max           0.001
_refine_ls_shift/su_mean          0.000
 
loop_
 _atom_site_label
 _atom_site_type_symbol
 _atom_site_fract_x
 _atom_site_fract_y
 _atom_site_fract_z
 _atom_site_U_iso_or_equiv
 _atom_site_adp_type
 _atom_site_occupancy
 _atom_site_symmetry_multiplicity
 _atom_site_calc_flag
 _atom_site_refinement_flags
 _atom_site_disorder_assembly
 _atom_site_disorder_group
Cu1 Cu 0.0000 0.5000 0.5000 0.113(2) Uani 1 2 d S . .
Cu2 Cu 0.3577(2) 0.59803(13) 0.53966(18) 0.0907(11) Uani 1 1 d . . .
Mo1 Mo 0.25005(13) 0.2500 0.29682(12) 0.0410(5) Uani 1 2 d S . .
Mo2 Mo 0.32611(9) 0.36248(7) 0.43284(10) 0.0440(4) Uani 1 1 d . . .
Mo3 Mo 0.13046(9) 0.36578(8) 0.38020(10) 0.0486(4) Uani 1 1 d . . .
Mo4 Mo 0.15358(13) 0.2500 0.73572(13) 0.0486(6) Uani 1 2 d S . .
Mo5 Mo 0.00263(12) 0.2500 0.44822(15) 0.0554(7) Uani 1 2 d S . .
Mo6 Mo 0.07079(11) 0.35987(9) 0.59737(11) 0.0651(6) Uani 1 1 d . . .
Mo7 Mo 0.39460(13) 0.2500 0.57256(15) 0.0574(7) Uani 1 2 d S . .
Mo8 Mo 0.26675(11) 0.36813(9) 0.64818(11) 0.0668(6) Uani 1 1 d . . .
C1 C 0.2024(14) 0.5632(9) 0.6028(13) 0.068(7) Uani 1 1 d . . .
C2 C 0.1302(13) 0.5451(10) 0.5953(15) 0.071(6) Uani 1 1 d . . .
C3 C 0.2200(16) 0.5458(9) 0.4576(14) 0.078(8) Uani 1 1 d . . .
C4 C 0.1483(18) 0.5290(10) 0.4504(17) 0.089(10) Uani 1 1 d . . .
H4 H 0.1294 0.5160 0.3983 0.107 Uiso 1 1 calc R . .
C5 C 0.2799(19) 0.5432(11) 0.3828(12) 0.120(12) Uani 1 1 d . . .
H5A H 0.3152 0.5109 0.3930 0.181 Uiso 1 1 calc R . .
H5B H 0.3069 0.5809 0.3800 0.181 Uiso 1 1 calc R . .
H5C H 0.2540 0.5362 0.3300 0.181 Uiso 1 1 calc R . .
C6 C 0.0791(15) 0.5478(13) 0.6726(17) 0.108(9) Uani 1 1 d . . .
H6A H 0.0441 0.5145 0.6713 0.161 Uiso 1 1 calc R . .
H6B H 0.0513 0.5853 0.6723 0.161 Uiso 1 1 calc R . .
H6C H 0.1095 0.5455 0.7232 0.161 Uiso 1 1 calc R . .
C7 C 0.2367(13) 0.5826(10) 0.6838(11) 0.078(7) Uani 1 1 d . . .
H7A H 0.2161 0.6212 0.7000 0.117 Uiso 1 1 calc R . .
H7B H 0.2908 0.5861 0.6770 0.117 Uiso 1 1 calc R . .
H7C H 0.2257 0.5533 0.7271 0.117 Uiso 1 1 calc R . .
C8 C 0.4063(9) 0.7181(7) 0.6000(10) 0.035(4) Uani 1 1 d . . .
C9 C 0.4644(12) 0.6825(9) 0.6497(12) 0.067(6) Uani 1 1 d . . .
H9A H 0.4445 0.6431 0.6624 0.100 Uiso 1 1 calc R . .
H9B H 0.4758 0.7034 0.7017 0.100 Uiso 1 1 calc R . .
H9C H 0.5099 0.6785 0.6165 0.100 Uiso 1 1 calc R . .
C10 C 0.3036(10) 0.7165(9) 0.5116(11) 0.054(5) Uani 1 1 d . . .
C11 C 0.2403(18) 0.6986(16) 0.458(2) 0.049(9) Uani 0.50 1 d P . .
H11A H 0.2575 0.6696 0.4164 0.074 Uiso 0.50 1 calc PR . .
H11B H 0.2205 0.7335 0.4288 0.074 Uiso 0.50 1 calc PR . .
H11C H 0.2010 0.6808 0.4918 0.074 Uiso 0.50 1 calc PR . .
C12 C 0.4711(17) 0.5980(10) 0.3840(15) 0.108(10) Uani 1 1 d . . .
H12A H 0.5125 0.6033 0.3450 0.162 Uiso 1 1 calc R . .
H12B H 0.4651 0.6341 0.4173 0.162 Uiso 1 1 calc R . .
H12C H 0.4252 0.5903 0.3528 0.162 Uiso 1 1 calc R . .
C13 C 0.4881(16) 0.5435(10) 0.4439(13) 0.077(8) Uani 1 1 d . . .
C14 C 0.4640(14) 0.4972(11) 0.5731(15) 0.072(6) Uani 1 1 d U . .
C15 C 0.431(2) 0.4967(16) 0.648(2) 0.058(11) Uani 0.50 1 d P . .
H15A H 0.4050 0.4590 0.6560 0.087 Uiso 0.50 1 calc PRD . .
H15B H 0.3954 0.5295 0.6517 0.087 Uiso 0.50 1 calc PR . .
H15C H 0.4690 0.5014 0.6916 0.087 Uiso 0.50 1 calc PR . .
N1 N 0.4456(11) 0.5433(7) 0.5163(11) 0.071(6) Uani 1 1 d . . .
N2 N 0.3587(11) 0.6880(8) 0.5541(10) 0.063(5) Uani 1 1 d . . .
N3 N 0.2506(11) 0.5626(7) 0.5344(10) 0.066(5) Uani 1 1 d . . .
N4 N 0.1043(12) 0.5309(8) 0.5165(16) 0.086(7) Uani 1 1 d . . .
O1 O 0.2730(9) 0.2500 0.1962(9) 0.049(4) Uani 1 2 d S . .
O2 O 0.1707(7) 0.3094(7) 0.3010(9) 0.075(5) Uani 1 1 d . . .
O3 O 0.3162(7) 0.3108(6) 0.3397(9) 0.069(4) Uani 1 1 d . . .
O4 O -0.0873(10) 0.2500 0.4235(14) 0.097(8) Uani 1 2 d S . .
O5 O 0.0447(10) 0.3097(7) 0.3821(9) 0.090(5) Uani 1 1 d . . .
O6 O 0.0979(8) 0.4202(6) 0.3164(9) 0.079(5) Uani 1 1 d . . .
O7 O 0.2273(8) 0.3959(6) 0.4024(9) 0.076(4) Uani 1 1 d . . .
O8 O 0.3929(9) 0.3103(8) 0.4882(7) 0.086(5) Uani 1 1 d . . .
O9 O 0.4845(12) 0.2500 0.6022(15) 0.106(9) Uani 1 2 d S . .
O10 O 0.3030(10) 0.3954(7) 0.5450(8) 0.085(5) Uani 1 1 d . . .
O11 O 0.1682(9) 0.3943(8) 0.6309(12) 0.110(6) Uani 1 1 d . . .
O12 O 0.0918(11) 0.3936(7) 0.4862(9) 0.104(6) Uani 1 1 d . . .
O13 O 0.0030(11) 0.3088(7) 0.5438(9) 0.100(6) Uani 1 1 d . . .
O14 O 0.0782(8) 0.3075(7) 0.6909(10) 0.084(5) Uani 1 1 d . . .
O15 O 0.0107(8) 0.4134(7) 0.6324(9) 0.080(5) Uani 1 1 d . . .
O16 O 0.3850(8) 0.4149(6) 0.3968(9) 0.075(4) Uani 1 1 d . . .
O17 O 0.1294(11) 0.2500 0.8374(11) 0.112(11) Uani 1 2 d S . .
O18 O 0.3024(10) 0.4200(7) 0.7135(9) 0.094(6) Uani 1 1 d . . .
O19 O 0.3543(10) 0.3116(8) 0.6506(8) 0.105(6) Uani 1 1 d . . .
O20 O 0.2266(8) 0.3106(7) 0.7289(11) 0.092(5) Uani 1 1 d . . .
O21 O 0.2207(11) 0.2892(9) 0.4401(12) 0.031(5) Uani 0.50 1 d P . .
O22 O 0.2666(10) 0.2923(8) 0.5365(12) 0.026(4) Uani 0.50 1 d P . .
O23 O 0.1813(10) 0.2875(9) 0.5933(11) 0.032(5) Uani 0.50 1 d P . .
O24 O 0.1297(13) 0.2896(9) 0.4952(13) 0.043(6) Uani 0.50 1 d P . .
P1 P 0.1986(3) 0.2500 0.5159(3) 0.0255(12) Uani 1 2 d S . .
O1W O 0.410(2) 0.2500 0.809(3) 0.195(16) Uiso 1 2 d SD . .
H1B H 0.44(2) 0.2500 0.767(18) 0.292 Uiso 1 2 d SD . .
H1A H 0.44(2) 0.2500 0.853(16) 0.292 Uiso 1 2 d SD . .
 
loop_
 _atom_site_aniso_label
 _atom_site_aniso_U_11
 _atom_site_aniso_U_22
 _atom_site_aniso_U_33
 _atom_site_aniso_U_23
 _atom_site_aniso_U_13
 _atom_site_aniso_U_12
Cu1 0.100(4) 0.077(3) 0.161(5) -0.029(3) -0.080(4) 0.012(3)
Cu2 0.152(3) 0.0585(18) 0.0618(16) -0.0056(14) -0.0159(19) -0.029(2)
Mo1 0.0442(13) 0.0513(14) 0.0273(10) 0.000 0.0069(10) 0.000
Mo2 0.0425(9) 0.0418(9) 0.0478(9) 0.0002(7) 0.0088(7) -0.0085(8)
Mo3 0.0511(10) 0.0479(9) 0.0469(9) 0.0097(8) -0.0016(8) 0.0146(8)
Mo4 0.0395(13) 0.0788(17) 0.0276(11) 0.000 0.0049(10) 0.000
Mo5 0.0230(11) 0.094(2) 0.0496(14) 0.000 0.0015(11) 0.000
Mo6 0.0706(13) 0.0672(12) 0.0573(11) -0.0071(9) 0.0212(9) 0.0276(11)
Mo7 0.0365(13) 0.0849(19) 0.0507(14) 0.000 -0.0180(11) 0.000
Mo8 0.0713(13) 0.0738(13) 0.0552(10) -0.0333(10) 0.0058(9) -0.0135(11)
C1 0.101(19) 0.049(12) 0.056(13) -0.015(10) -0.045(13) 0.012(12)
C2 0.065(14) 0.054(13) 0.094(17) -0.012(12) -0.041(14) -0.002(12)
C3 0.11(2) 0.046(12) 0.078(16) -0.024(11) -0.059(15) 0.034(13)
C4 0.13(3) 0.046(13) 0.090(19) -0.017(14) -0.08(2) 0.022(16)
C5 0.26(4) 0.074(17) 0.029(11) 0.001(11) -0.028(18) 0.02(2)
C6 0.10(2) 0.11(2) 0.11(2) -0.037(18) 0.001(18) 0.028(18)
C7 0.097(18) 0.090(17) 0.047(11) -0.031(11) -0.017(12) -0.034(14)
C8 0.039(9) 0.025(8) 0.042(9) 0.005(7) 0.007(8) -0.001(7)
C9 0.077(15) 0.062(13) 0.062(13) 0.001(11) 0.011(12) 0.025(12)
C10 0.035(9) 0.089(14) 0.039(10) -0.012(9) 0.009(8) -0.017(10)
C11 0.04(2) 0.06(2) 0.05(2) 0.022(18) -0.007(18) 0.002(18)
C12 0.17(3) 0.057(15) 0.100(19) 0.032(14) 0.007(19) -0.047(17)
C13 0.12(2) 0.060(15) 0.051(13) 0.004(11) -0.022(14) -0.053(15)
C14 0.081(10) 0.062(9) 0.074(10) -0.007(8) -0.008(8) -0.018(8)
C15 0.08(3) 0.04(2) 0.05(2) -0.014(18) 0.01(2) -0.03(2)
N1 0.119(16) 0.038(9) 0.056(10) -0.009(8) -0.025(11) -0.040(10)
N2 0.083(13) 0.062(11) 0.043(9) 0.004(8) 0.012(9) -0.008(10)
N3 0.109(15) 0.042(9) 0.048(10) -0.007(8) -0.034(11) -0.001(10)
N4 0.085(15) 0.042(11) 0.130(19) -0.022(13) -0.063(15) 0.021(10)
O1 0.037(9) 0.080(13) 0.030(8) 0.000 0.008(7) 0.000
O2 0.031(7) 0.091(11) 0.102(11) -0.050(9) -0.018(7) 0.020(7)
O3 0.046(8) 0.067(9) 0.095(10) -0.043(8) -0.024(7) 0.022(7)
O4 0.025(10) 0.18(3) 0.082(15) 0.000 0.013(10) 0.000
O5 0.112(13) 0.101(12) 0.056(9) -0.007(9) 0.027(9) -0.043(11)
O6 0.088(11) 0.071(10) 0.077(10) 0.022(8) -0.021(8) 0.036(9)
O7 0.060(9) 0.062(9) 0.105(11) -0.041(8) -0.005(8) 0.018(8)
O8 0.099(12) 0.126(13) 0.032(7) 0.011(8) 0.007(8) 0.039(11)
O9 0.058(14) 0.17(3) 0.091(17) 0.000 -0.048(13) 0.000
O10 0.122(14) 0.083(11) 0.051(8) 0.009(8) 0.018(9) 0.020(10)
O11 0.068(11) 0.103(14) 0.157(17) 0.065(13) -0.001(11) 0.005(10)
O12 0.156(17) 0.091(12) 0.066(10) -0.006(9) 0.043(10) -0.058(12)
O13 0.152(17) 0.095(12) 0.053(9) -0.018(8) 0.037(10) -0.053(12)
O14 0.047(9) 0.084(11) 0.122(13) 0.041(10) -0.014(9) -0.007(8)
O15 0.078(10) 0.085(11) 0.078(10) -0.002(8) 0.022(8) 0.054(9)
O16 0.082(10) 0.051(9) 0.092(10) 0.011(8) 0.030(9) -0.023(8)
O17 0.032(11) 0.27(3) 0.029(10) 0.000 0.006(9) 0.000
O18 0.136(15) 0.084(12) 0.062(9) -0.034(8) 0.007(10) -0.037(11)
O19 0.129(15) 0.149(16) 0.036(7) 0.015(9) 0.013(9) 0.073(13)
O20 0.056(9) 0.080(11) 0.141(15) 0.022(11) -0.010(10) -0.023(8)
O21 0.025(10) 0.031(11) 0.036(11) -0.015(9) 0.001(9) -0.019(9)
O22 0.023(10) 0.021(10) 0.033(11) 0.008(8) 0.011(9) -0.007(8)
O23 0.018(10) 0.056(14) 0.022(10) 0.003(9) 0.002(8) -0.006(10)
O24 0.050(14) 0.037(13) 0.043(13) 0.002(10) -0.017(11) 0.023(11)
P1 0.026(3) 0.030(3) 0.020(3) 0.000 -0.004(2) 0.000
 
_geom_special_details
;
 All s.u.'s (except the s.u. in the dihedral angle between two l.s. planes)
 are estimated using the full covariance matrix.  The cell s.u.'s are taken
 into account individually in the estimation of s.u.'s in distances, angles
 and torsion angles; correlations between s.u.'s in cell parameters are only
 used when they are defined by crystal symmetry.  An approximate (isotropic)
 treatment of cell s.u.'s is used for estimating s.u.'s involving l.s. planes.
;
 
loop_
 _geom_bond_atom_site_label_1
 _geom_bond_atom_site_label_2
 _geom_bond_distance
 _geom_bond_site_symmetry_2
 _geom_bond_publ_flag
Cu1 N4 1.98(2) 5_566 ?
Cu1 N4 1.98(2) . ?
Cu2 N1 2.00(2) . ?
Cu2 N2 2.001(17) . ?
Cu2 N3 2.042(19) . ?
Mo1 O1 1.634(14) . ?
Mo1 O3 1.902(13) . ?
Mo1 O3 1.902(13) 8_565 ?
Mo1 O2 1.917(12) . ?
Mo1 O2 1.917(12) 8_565 ?
Mo1 O21 2.469(18) . ?
Mo1 O21 2.469(18) 8_565 ?
Mo2 O16 1.654(12) . ?
Mo2 O8 1.862(14) . ?
Mo2 O3 1.864(12) . ?
Mo2 O7 1.949(14) . ?
Mo2 O10 1.951(13) . ?
Mo2 O21 2.464(17) . ?
Mo2 O22 2.482(17) . ?
Mo3 O6 1.667(12) . ?
Mo3 O7 1.861(14) . ?
Mo3 O2 1.898(12) . ?
Mo3 O12 1.903(15) . ?
Mo3 O5 1.952(15) . ?
Mo3 O24 2.47(2) . ?
Mo3 O21 2.50(2) . ?
Mo4 O17 1.655(17) . ?
Mo4 O20 1.859(14) 8_565 ?
Mo4 O20 1.859(14) . ?
Mo4 O14 1.966(14) 8_565 ?
Mo4 O14 1.966(14) . ?
Mo4 O23 2.438(18) 8_565 ?
Mo4 O23 2.438(18) . ?
Mo5 O4 1.630(19) . ?
Mo5 O5 1.837(14) 8_565 ?
Mo5 O5 1.837(14) . ?
Mo5 O13 1.987(14) . ?
Mo5 O13 1.987(14) 8_565 ?
Mo5 O24 2.51(2) 8_565 ?
Mo5 O24 2.51(2) . ?
Mo6 O15 1.679(12) . ?
Mo6 O13 1.845(16) . ?
Mo6 O14 1.877(14) . ?
Mo6 O12 1.936(14) . ?
Mo6 O11 1.948(17) . ?
Mo6 O24 2.46(2) . ?
Mo6 O23 2.52(2) . ?
Mo7 O9 1.65(2) . ?
Mo7 O8 1.881(14) 8_565 ?
Mo7 O8 1.881(14) . ?
Mo7 O19 1.966(15) . ?
Mo7 O19 1.966(15) 8_565 ?
Mo7 O22 2.503(19) . ?
Mo7 O22 2.503(19) 8_565 ?
Mo8 O18 1.661(13) . ?
Mo8 O10 1.846(13) . ?
Mo8 O11 1.848(16) . ?
Mo8 O20 1.931(15) . ?
Mo8 O19 1.983(15) . ?
Mo8 O22 2.427(19) . ?
Mo8 O23 2.48(2) . ?
C1 C2 1.34(3) . ?
C1 N3 1.37(3) . ?
C1 C7 1.47(2) . ?
C2 N4 1.36(3) . ?
C2 C6 1.51(3) . ?
C3 C4 1.32(4) . ?
C3 N3 1.37(2) . ?
C3 C5 1.58(4) . ?
C4 N4 1.30(3) . ?
C8 N2 1.29(2) . ?
C8 C8 1.41(3) 8_575 ?
C8 C9 1.51(2) . ?
C10 N2 1.33(2) . ?
C10 C11 1.46(4) . ?
C10 C10 1.48(4) 8_575 ?
C12 C13 1.56(3) . ?
C13 C14 1.26(3) 5_666 ?
C13 N1 1.36(3) . ?
C14 C13 1.26(3) 5_666 ?
C14 C15 1.31(4) . ?
C14 N1 1.39(3) . ?
O21 P1 1.52(2) . ?
O21 O22 1.72(3) . ?
O21 O21 1.73(4) 8_565 ?
O22 P1 1.552(18) . ?
O22 O23 1.75(2) . ?
O23 P1 1.505(19) . ?
O23 O23 1.66(4) 8_565 ?
O23 O24 1.79(3) . ?
O24 P1 1.53(2) . ?
O24 O24 1.75(4) 8_565 ?
P1 O23 1.505(19) 8_565 ?
P1 O21 1.52(2) 8_565 ?
P1 O24 1.53(2) 8_565 ?
P1 O22 1.552(18) 8_565 ?
 
loop_
 _geom_angle_atom_site_label_1
 _geom_angle_atom_site_label_2
 _geom_angle_atom_site_label_3
 _geom_angle
 _geom_angle_site_symmetry_1
 _geom_angle_site_symmetry_3
 _geom_angle_publ_flag
N4 Cu1 N4 180.0(11) 5_566 . ?
N1 Cu2 N2 128.0(7) . . ?
N1 Cu2 N3 118.3(6) . . ?
N2 Cu2 N3 113.2(7) . . ?
O1 Mo1 O3 101.1(6) . . ?
O1 Mo1 O3 101.1(6) . 8_565 ?
O3 Mo1 O3 89.9(8) . 8_565 ?
O1 Mo1 O2 102.3(6) . . ?
O3 Mo1 O2 87.1(5) . . ?
O3 Mo1 O2 156.5(7) 8_565 . ?
O1 Mo1 O2 102.3(6) . 8_565 ?
O3 Mo1 O2 156.5(7) . 8_565 ?
O3 Mo1 O2 87.1(5) 8_565 8_565 ?
O2 Mo1 O2 86.5(9) . 8_565 ?
O1 Mo1 O21 159.4(4) . . ?
O3 Mo1 O21 63.7(6) . . ?
O3 Mo1 O21 93.0(7) 8_565 . ?
O2 Mo1 O21 64.9(6) . . ?
O2 Mo1 O21 93.2(6) 8_565 . ?
O1 Mo1 O21 159.4(4) . 8_565 ?
O3 Mo1 O21 93.0(7) . 8_565 ?
O3 Mo1 O21 63.7(6) 8_565 8_565 ?
O2 Mo1 O21 93.2(6) . 8_565 ?
O2 Mo1 O21 64.9(6) 8_565 8_565 ?
O21 Mo1 O21 41.1(9) . 8_565 ?
O16 Mo2 O8 101.4(8) . . ?
O16 Mo2 O3 102.6(7) . . ?
O8 Mo2 O3 92.7(6) . . ?
O16 Mo2 O7 102.0(7) . . ?
O8 Mo2 O7 155.9(7) . . ?
O3 Mo2 O7 87.5(5) . . ?
O16 Mo2 O10 100.3(7) . . ?
O8 Mo2 O10 86.5(6) . . ?
O3 Mo2 O10 156.8(7) . . ?
O7 Mo2 O10 84.0(6) . . ?
O16 Mo2 O21 161.3(7) . . ?
O8 Mo2 O21 92.7(7) . . ?
O3 Mo2 O21 64.2(6) . . ?
O7 Mo2 O21 65.7(7) . . ?
O10 Mo2 O21 92.7(7) . . ?
O16 Mo2 O22 157.9(7) . . ?
O8 Mo2 O22 64.7(7) . . ?
O3 Mo2 O22 95.5(7) . . ?
O7 Mo2 O22 91.3(6) . . ?
O10 Mo2 O22 63.3(6) . . ?
O21 Mo2 O22 40.7(6) . . ?
O6 Mo3 O7 99.7(7) . . ?
O6 Mo3 O2 101.8(7) . . ?
O7 Mo3 O2 90.9(5) . . ?
O6 Mo3 O12 100.0(8) . . ?
O7 Mo3 O12 92.7(7) . . ?
O2 Mo3 O12 156.9(7) . . ?
O6 Mo3 O5 101.6(8) . . ?
O7 Mo3 O5 158.6(7) . . ?
O2 Mo3 O5 83.2(6) . . ?
O12 Mo3 O5 85.1(6) . . ?
O6 Mo3 O24 158.4(7) . . ?
O7 Mo3 O24 96.4(7) . . ?
O2 Mo3 O24 92.1(7) . . ?
O12 Mo3 O24 64.9(7) . . ?
O5 Mo3 O24 63.4(7) . . ?
O6 Mo3 O21 158.6(7) . . ?
O7 Mo3 O21 65.9(6) . . ?
O2 Mo3 O21 64.4(6) . . ?
O12 Mo3 O21 96.6(7) . . ?
O5 Mo3 O21 93.2(7) . . ?
O24 Mo3 O21 42.9(7) . . ?
O17 Mo4 O20 103.5(7) . 8_565 ?
O17 Mo4 O20 103.5(7) . . ?
O20 Mo4 O20 92.1(10) 8_565 . ?
O17 Mo4 O14 100.0(7) . 8_565 ?
O20 Mo4 O14 88.9(6) 8_565 8_565 ?
O20 Mo4 O14 155.6(7) . 8_565 ?
O17 Mo4 O14 100.0(7) . . ?
O20 Mo4 O14 155.6(7) 8_565 . ?
O20 Mo4 O14 88.9(6) . . ?
O14 Mo4 O14 80.4(9) 8_565 . ?
O17 Mo4 O23 160.0(5) . 8_565 ?
O20 Mo4 O23 64.1(7) 8_565 8_565 ?
O20 Mo4 O23 93.1(7) . 8_565 ?
O14 Mo4 O23 65.5(6) 8_565 8_565 ?
O14 Mo4 O23 91.4(7) . 8_565 ?
O17 Mo4 O23 160.0(5) . . ?
O20 Mo4 O23 93.1(7) 8_565 . ?
O20 Mo4 O23 64.1(7) . . ?
O14 Mo4 O23 91.4(7) 8_565 . ?
O14 Mo4 O23 65.5(6) . . ?
O23 Mo4 O23 39.8(10) 8_565 . ?
O4 Mo5 O5 104.8(8) . 8_565 ?
O4 Mo5 O5 104.8(8) . . ?
O5 Mo5 O5 91.9(10) 8_565 . ?
O4 Mo5 O13 100.6(8) . . ?
O5 Mo5 O13 153.8(8) 8_565 . ?
O5 Mo5 O13 87.6(6) . . ?
O4 Mo5 O13 100.6(8) . 8_565 ?
O5 Mo5 O13 87.6(6) 8_565 8_565 ?
O5 Mo5 O13 153.8(8) . 8_565 ?
O13 Mo5 O13 81.7(9) . 8_565 ?
O4 Mo5 O24 159.1(5) . 8_565 ?
O5 Mo5 O24 63.7(7) 8_565 8_565 ?
O5 Mo5 O24 93.3(8) . 8_565 ?
O13 Mo5 O24 90.1(7) . 8_565 ?
O13 Mo5 O24 63.0(7) 8_565 8_565 ?
O4 Mo5 O24 159.1(5) . . ?
O5 Mo5 O24 93.3(8) 8_565 . ?
O5 Mo5 O24 63.7(7) . . ?
O13 Mo5 O24 63.0(7) . . ?
O13 Mo5 O24 90.1(7) 8_565 . ?
O24 Mo5 O24 40.8(9) 8_565 . ?
O15 Mo6 O13 100.0(8) . . ?
O15 Mo6 O14 102.8(7) . . ?
O13 Mo6 O14 91.5(7) . . ?
O15 Mo6 O12 98.4(8) . . ?
O13 Mo6 O12 86.9(6) . . ?
O14 Mo6 O12 158.7(8) . . ?
O15 Mo6 O11 101.0(8) . . ?
O13 Mo6 O11 158.6(8) . . ?
O14 Mo6 O11 88.1(6) . . ?
O12 Mo6 O11 85.8(7) . . ?
O15 Mo6 O24 157.3(7) . . ?
O13 Mo6 O24 65.7(8) . . ?
O14 Mo6 O24 95.4(7) . . ?
O12 Mo6 O24 64.7(7) . . ?
O11 Mo6 O24 93.1(8) . . ?
O15 Mo6 O23 160.3(7) . . ?
O13 Mo6 O23 95.7(7) . . ?
O14 Mo6 O23 64.8(6) . . ?
O12 Mo6 O23 94.2(7) . . ?
O11 Mo6 O23 64.9(7) . . ?
O24 Mo6 O23 42.2(6) . . ?
O9 Mo7 O8 102.4(8) . 8_565 ?
O9 Mo7 O8 102.4(8) . . ?
O8 Mo7 O8 90.2(9) 8_565 . ?
O9 Mo7 O19 99.7(8) . . ?
O8 Mo7 O19 157.8(8) 8_565 . ?
O8 Mo7 O19 86.8(6) . . ?
O9 Mo7 O19 99.7(8) . 8_565 ?
O8 Mo7 O19 86.8(6) 8_565 8_565 ?
O8 Mo7 O19 157.8(8) . 8_565 ?
O19 Mo7 O19 87.7(10) . 8_565 ?
O9 Mo7 O22 158.0(4) . . ?
O8 Mo7 O22 95.2(7) 8_565 . ?
O8 Mo7 O22 64.0(6) . . ?
O19 Mo7 O22 63.8(6) . . ?
O19 Mo7 O22 94.4(7) 8_565 . ?
O9 Mo7 O22 158.0(4) . 8_565 ?
O8 Mo7 O22 64.0(6) 8_565 8_565 ?
O8 Mo7 O22 95.2(7) . 8_565 ?
O19 Mo7 O22 94.4(7) . 8_565 ?
O19 Mo7 O22 63.8(6) 8_565 8_565 ?
O22 Mo7 O22 43.9(8) . 8_565 ?
O18 Mo8 O10 100.9(7) . . ?
O18 Mo8 O11 103.2(9) . . ?
O10 Mo8 O11 95.3(7) . . ?
O18 Mo8 O20 100.6(7) . . ?
O10 Mo8 O20 157.0(7) . . ?
O11 Mo8 O20 87.7(7) . . ?
O18 Mo8 O19 97.4(9) . . ?
O10 Mo8 O19 87.4(6) . . ?
O11 Mo8 O19 158.3(9) . . ?
O20 Mo8 O19 81.8(7) . . ?
O18 Mo8 O22 157.5(7) . . ?
O10 Mo8 O22 65.7(6) . . ?
O11 Mo8 O22 96.3(8) . . ?
O20 Mo8 O22 91.3(7) . . ?
O19 Mo8 O22 65.2(7) . . ?
O18 Mo8 O23 159.5(7) . . ?
O10 Mo8 O23 97.9(7) . . ?
O11 Mo8 O23 66.8(8) . . ?
O20 Mo8 O23 62.3(6) . . ?
O19 Mo8 O23 91.5(8) . . ?
O22 Mo8 O23 41.7(6) . . ?
C2 C1 N3 121.1(19) . . ?
C2 C1 C7 124(2) . . ?
N3 C1 C7 115(2) . . ?
C1 C2 N4 118(2) . . ?
C1 C2 C6 119(2) . . ?
N4 C2 C6 123(2) . . ?
C4 C3 N3 122(3) . . ?
C4 C3 C5 124(2) . . ?
N3 C3 C5 114(2) . . ?
N4 C4 C3 120(2) . . ?
N2 C8 C8 120.9(10) . 8_575 ?
N2 C8 C9 117.6(16) . . ?
C8 C8 C9 121.4(10) 8_575 . ?
N2 C10 C11 136(2) . . ?
N2 C10 C10 118.1(11) . 8_575 ?
C11 C10 C10 105.8(16) . 8_575 ?
C14 C13 N1 123(2) 5_666 . ?
C14 C13 C12 123(2) 5_666 . ?
N1 C13 C12 114(3) . . ?
C13 C14 C15 119(3) 5_666 . ?
C13 C14 N1 123(2) 5_666 . ?
C15 C14 N1 119(3) . . ?
C13 N1 C14 114(2) . . ?
C13 N1 Cu2 125.3(17) . . ?
C14 N1 Cu2 120.2(18) . . ?
C8 N2 C10 120.6(17) . . ?
C8 N2 Cu2 125.4(14) . . ?
C10 N2 Cu2 113.9(14) . . ?
C1 N3 C3 117(2) . . ?
C1 N3 Cu2 122.4(13) . . ?
C3 N3 Cu2 120.1(18) . . ?
C4 N4 C2 123(2) . . ?
C4 N4 Cu1 115.9(19) . . ?
C2 N4 Cu1 121(2) . . ?
Mo3 O2 Mo1 138.0(7) . . ?
Mo2 O3 Mo1 140.2(8) . . ?
Mo5 O5 Mo3 140.9(9) . . ?
Mo3 O7 Mo2 136.6(8) . . ?
Mo2 O8 Mo7 141.1(9) . . ?
Mo8 O10 Mo2 138.2(9) . . ?
Mo8 O11 Mo6 138.0(11) . . ?
Mo3 O12 Mo6 137.4(10) . . ?
Mo6 O13 Mo5 138.4(10) . . ?
Mo6 O14 Mo4 136.6(8) . . ?
Mo7 O19 Mo8 134.7(8) . . ?
Mo4 O20 Mo8 139.9(10) . . ?
P1 O21 O22 56.8(9) . . ?
P1 O21 O21 55.4(7) . 8_565 ?
O22 O21 O21 92.3(9) . 8_565 ?
P1 O21 Mo2 126.9(10) . . ?
O22 O21 Mo2 70.2(8) . . ?
O21 O21 Mo2 131.1(5) 8_565 . ?
P1 O21 Mo1 124.6(10) . . ?
O22 O21 Mo1 136.1(12) . . ?
O21 O21 Mo1 69.5(5) 8_565 . ?
Mo2 O21 Mo1 91.8(6) . . ?
P1 O21 Mo3 121.1(10) . . ?
O22 O21 Mo3 127.0(11) . . ?
O21 O21 Mo3 132.5(4) 8_565 . ?
Mo2 O21 Mo3 90.9(6) . . ?
Mo1 O21 Mo3 91.5(7) . . ?
P1 O22 O21 55.2(9) . . ?
P1 O22 O23 53.8(9) . . ?
O21 O22 O23 92.6(12) . . ?
P1 O22 Mo8 124.6(10) . . ?
O21 O22 Mo8 131.8(12) . . ?
O23 O22 Mo8 70.9(9) . . ?
P1 O22 Mo2 124.3(10) . . ?
O21 O22 Mo2 69.1(8) . . ?
O23 O22 Mo2 137.3(12) . . ?
Mo8 O22 Mo2 92.6(6) . . ?
P1 O22 Mo7 121.0(9) . . ?
O21 O22 Mo7 127.4(11) . . ?
O23 O22 Mo7 129.3(11) . . ?
Mo8 O22 Mo7 95.3(6) . . ?
Mo2 O22 Mo7 90.2(6) . . ?
P1 O23 O23 56.6(8) . 8_565 ?
P1 O23 O22 56.4(9) . . ?
O23 O23 O22 93.5(9) 8_565 . ?
P1 O23 O24 54.5(9) . . ?
O23 O23 O24 91.5(10) 8_565 . ?
O22 O23 O24 89.6(12) . . ?
P1 O23 Mo4 126.7(12) . . ?
O23 O23 Mo4 70.1(5) 8_565 . ?
O22 O23 Mo4 131.4(11) . . ?
O24 O23 Mo4 134.3(12) . . ?
P1 O23 Mo8 123.6(10) . . ?
O23 O23 Mo8 135.8(5) 8_565 . ?
O22 O23 Mo8 67.4(9) . . ?
O24 O23 Mo8 126.0(12) . . ?
Mo4 O23 Mo8 92.6(6) . . ?
P1 O23 Mo6 121.8(10) . . ?
O23 O23 Mo6 129.4(4) 8_565 . ?
O22 O23 Mo6 129.5(12) . . ?
O24 O23 Mo6 67.3(9) . . ?
Mo4 O23 Mo6 92.2(6) . . ?
Mo8 O23 Mo6 90.2(7) . . ?
P1 O24 O24 55.2(9) . 8_565 ?
P1 O24 O23 53.1(9) . . ?
O24 O24 O23 88.5(9) 8_565 . ?
P1 O24 Mo6 123.6(11) . . ?
O24 O24 Mo6 129.1(5) 8_565 . ?
O23 O24 Mo6 70.5(9) . . ?
P1 O24 Mo3 122.7(13) . . ?
O24 O24 Mo3 132.9(5) 8_565 . ?
O23 O24 Mo3 130.2(13) . . ?
Mo6 O24 Mo3 92.9(7) . . ?
P1 O24 Mo5 124.7(12) . . ?
O24 O24 Mo5 69.6(5) 8_565 . ?
O23 O24 Mo5 134.1(13) . . ?
Mo6 O24 Mo5 92.1(8) . . ?
Mo3 O24 Mo5 91.5(7) . . ?
O23 P1 O23 66.9(15) . 8_565 ?
O23 P1 O21 176.5(11) . 8_565 ?
O23 P1 O21 111.8(10) 8_565 8_565 ?
O23 P1 O21 111.8(10) . . ?
O23 P1 O21 176.5(11) 8_565 . ?
O21 P1 O21 69.2(14) 8_565 . ?
O23 P1 O24 72.4(11) . . ?
O23 P1 O24 109.1(12) 8_565 . ?
O21 P1 O24 111.1(11) 8_565 . ?
O21 P1 O24 73.2(11) . . ?
O23 P1 O24 109.1(12) . 8_565 ?
O23 P1 O24 72.4(11) 8_565 8_565 ?
O21 P1 O24 73.2(11) 8_565 8_565 ?
O21 P1 O24 111.1(11) . 8_565 ?
O24 P1 O24 69.7(17) . 8_565 ?
O23 P1 O22 108.6(10) . 8_565 ?
O23 P1 O22 69.8(10) 8_565 8_565 ?
O21 P1 O22 68.0(9) 8_565 8_565 ?
O21 P1 O22 108.0(11) . 8_565 ?
O24 P1 O22 177.8(12) . 8_565 ?
O24 P1 O22 108.1(11) 8_565 8_565 ?
O23 P1 O22 69.8(10) . . ?
O23 P1 O22 108.6(10) 8_565 . ?
O21 P1 O22 108.0(11) 8_565 . ?
O21 P1 O22 68.0(9) . . ?
O24 P1 O22 108.1(11) . . ?
O24 P1 O22 177.8(12) 8_565 . ?
O22 P1 O22 74.1(14) 8_565 . ?
 
_diffrn_measured_fraction_theta_max    0.999
_diffrn_reflns_theta_full              25.36
_diffrn_measured_fraction_theta_full   0.999
_refine_diff_density_max    1.098
_refine_diff_density_min   -1.329
_refine_diff_density_rms    0.203

#========================================================end

 
data_7
 
_audit_creation_method            SHELXL-97
_chemical_name_systematic
;
 ?
;
_chemical_name_common             ?
_chemical_melting_point           ?
_chemical_formula_moiety           'C35 H38 Cu4 Mo12 N10 O40 P'
_chemical_formula_sum
 'C35 H38 Cu4 Mo12 N10 O40 P'
_chemical_formula_weight          2675.16
 
loop_
 _atom_type_symbol
 _atom_type_description
 _atom_type_scat_dispersion_real
 _atom_type_scat_dispersion_imag
 _atom_type_scat_source
 'C'  'C'   0.0033   0.0016
 'International Tables Vol C Tables 4.2.6.8 and 6.1.1.4'
 'H'  'H'   0.0000   0.0000
 'International Tables Vol C Tables 4.2.6.8 and 6.1.1.4'
 'N'  'N'   0.0061   0.0033
 'International Tables Vol C Tables 4.2.6.8 and 6.1.1.4'
 'O'  'O'   0.0106   0.0060
 'International Tables Vol C Tables 4.2.6.8 and 6.1.1.4'
 'P'  'P'   0.1023   0.0942
 'International Tables Vol C Tables 4.2.6.8 and 6.1.1.4'
 'Cu'  'Cu'   0.3201   1.2651
 'International Tables Vol C Tables 4.2.6.8 and 6.1.1.4'
 'Mo'  'Mo'  -1.6832   0.6857
 'International Tables Vol C Tables 4.2.6.8 and 6.1.1.4'
 
_symmetry_cell_setting            monoclinic
_symmetry_space_group_name_H-M     'P 21/n'
_symmetry_space_group_name_hall   '-P 2yn  '
loop_
 _symmetry_equiv_pos_as_xyz
 'x, y, z'
 '-x+1/2, y+1/2, -z+1/2'
 '-x, -y, -z'
 'x-1/2, -y-1/2, z-1/2'
 
_cell_length_a                    12.8567(4)
_cell_length_b                    11.8861(3)
_cell_length_c                    22.4652(7)
_cell_angle_alpha                 90.00
_cell_angle_beta                  92.158(3)
_cell_angle_gamma                 90.00
_cell_volume                      3430.61(17)
_cell_formula_units_Z             2
_cell_measurement_temperature     293(2)
_cell_measurement_reflns_used     6996
_cell_measurement_theta_min      1.8
_cell_measurement_theta_max       26.4
 
_exptl_crystal_description        block
_exptl_crystal_colour             black
_exptl_crystal_size_max           0.25
_exptl_crystal_size_mid           0.20
_exptl_crystal_size_min           0.11
_exptl_crystal_density_meas       ?
_exptl_crystal_density_diffrn     2.590
_exptl_crystal_density_method     'not measured'
_exptl_crystal_F_000              2546
_exptl_absorpt_coefficient_mu     3.443
_exptl_absorpt_correction_type     multi-scan
_exptl_absorpt_correction_T_min   0.42
_exptl_absorpt_correction_T_max   0.71
_exptl_absorpt_process_details    
;
CrysAlis (Oxford Diffraction, 2006)
; 
_exptl_special_details
;
 ?
;
 
_diffrn_ambient_temperature       293(2)
_diffrn_radiation_wavelength      0.71073
_diffrn_radiation_type            MoK\a
_diffrn_radiation_source          'fine-focus sealed tube'
_diffrn_radiation_monochromator   graphite
_diffrn_measurement_device_type   'Oxford Diffraction Gemini R Ultra'
_diffrn_measurement_method        '\w scan'
_diffrn_detector_area_resol_mean  10.0
_diffrn_standards_number          ?
_diffrn_standards_interval_count  ?
_diffrn_standards_interval_time   ?
_diffrn_standards_decay_%         ?
_diffrn_reflns_number             15416
_diffrn_reflns_av_R_equivalents   0.0405
_diffrn_reflns_av_sigmaI/netI     0.0936
_diffrn_reflns_limit_h_min        -16
_diffrn_reflns_limit_h_max        15
_diffrn_reflns_limit_k_min        -12
_diffrn_reflns_limit_k_max        14
_diffrn_reflns_limit_l_min        -28
_diffrn_reflns_limit_l_max        21
_diffrn_reflns_theta_min          1.80
_diffrn_reflns_theta_max          26.37
_reflns_number_total              6996
_reflns_number_gt                 2988
_reflns_threshold_expression      >2\s(I)
 
_computing_data_collection        'CrysAlis (Oxford Diffraction, 2006)'
_computing_cell_refinement        'CrysAlis'
_computing_data_reduction         'CrysAlis'
_computing_structure_solution      'SHELXS-97 (Sheldrick, 1997)'
_computing_structure_refinement   'SHELXL-97 (Sheldrick, 2008)'
_computing_molecular_graphics     ?
_computing_publication_material   ?
 
_refine_special_details
;
 Refinement of F^2^ against ALL reflections.  The weighted R-factor wR and
 goodness of fit S are based on F^2^, conventional R-factors R are based
 on F, with F set to zero for negative F^2^. The threshold expression of
 F^2^ > 2\s(F^2^) is used only for calculating R-factors(gt) etc. and is
 not relevant to the choice of reflections for refinement.  R-factors based
 on F^2^ are statistically about twice as large as those based on F, and R-
 factors based on ALL data will be even larger.
;
 
_refine_ls_structure_factor_coef  Fsqd
_refine_ls_matrix_type            full
_refine_ls_weighting_scheme       calc
_refine_ls_weighting_details
 'calc w=1/[\s^2^(Fo^2^)+(0.1003P)^2^+0.0000P] where P=(Fo^2^+2Fc^2^)/3'
_atom_sites_solution_primary      direct
_atom_sites_solution_secondary    difmap
_atom_sites_solution_hydrogens    geom
_refine_ls_hydrogen_treatment     constr
_refine_ls_extinction_method      none
_refine_ls_extinction_coef        ?
_refine_ls_number_reflns          6996
_refine_ls_number_parameters      560
_refine_ls_number_restraints      10
_refine_ls_R_factor_all           0.1413
_refine_ls_R_factor_gt            0.0586
_refine_ls_wR_factor_ref          0.1745
_refine_ls_wR_factor_gt           0.1482
_refine_ls_goodness_of_fit_ref    0.844
_refine_ls_restrained_S_all       0.851
_refine_ls_shift/su_max           0.001
_refine_ls_shift/su_mean          0.000
 
loop_
 _atom_site_label
 _atom_site_type_symbol
 _atom_site_fract_x
 _atom_site_fract_y
 _atom_site_fract_z
 _atom_site_U_iso_or_equiv
 _atom_site_adp_type
 _atom_site_occupancy
 _atom_site_symmetry_multiplicity
 _atom_site_calc_flag
 _atom_site_refinement_flags
 _atom_site_disorder_assembly
 _atom_site_disorder_group
Cu1 Cu 1.64434(11) 1.00291(10) 1.27570(7) 0.0704(4) Uani 1 1 d D . .
Cu2 Cu 1.22607(14) 0.97696(18) 1.43892(10) 0.1229(8) Uani 1 1 d . . .
Mo1 Mo 1.43754(8) 1.33484(8) 1.36992(4) 0.0697(3) Uani 1 1 d . . .
Mo2 Mo 1.76592(9) 1.50295(8) 1.45846(6) 0.0870(4) Uani 1 1 d . . .
Mo3 Mo 1.56803(8) 1.59689(8) 1.35508(4) 0.0675(3) Uani 1 1 d . . .
Mo4 Mo 1.69855(9) 1.40901(8) 1.60430(5) 0.0738(3) Uani 1 1 d . . .
Mo5 Mo 1.36704(8) 1.24253(7) 1.51524(6) 0.0886(4) Uani 1 1 d . . .
Mo6 Mo 1.63381(10) 1.24542(7) 1.47538(6) 0.0880(4) Uani 1 1 d . . .
C1 C 1.3347(8) 0.9414(9) 1.3286(6) 0.071(3) Uani 1 1 d . . .
C2 C 1.4214(8) 0.9400(8) 1.2948(5) 0.062(3) Uani 1 1 d . . .
C3 C 1.4322(10) 0.9936(9) 1.4107(5) 0.075(3) Uani 1 1 d . . .
H3 H 1.4386 1.0111 1.4510 0.090 Uiso 1 1 calc R . .
C4 C 1.5198(8) 0.9951(9) 1.3767(5) 0.065(3) Uani 1 1 d . . .
H4 H 1.5840 1.0137 1.3946 0.078 Uiso 1 1 calc R . .
C5 C 1.1826(15) 1.013(2) 1.2878(9) 0.208(13) Uani 1 1 d . . .
H5A H 1.1616 1.0565 1.3215 0.312 Uiso 1 1 calc R . .
H5B H 1.1229 0.9982 1.2621 0.312 Uiso 1 1 calc R . .
H5C H 1.2329 1.0553 1.2664 0.312 Uiso 1 1 calc R . .
C6 C 1.2272(13) 0.9108(14) 1.3077(9) 0.128(7) Uani 1 1 d . . .
H6A H 1.2284 0.8564 1.2756 0.154 Uiso 1 1 calc R . .
H6B H 1.1885 0.8793 1.3400 0.154 Uiso 1 1 calc R . .
C7 C 1.4218(10) 0.9032(12) 1.2301(6) 0.105(5) Uani 1 1 d . . .
H7A H 1.4890 0.9178 1.2145 0.157 Uiso 1 1 calc R . .
H7B H 1.3697 0.9445 1.2075 0.157 Uiso 1 1 calc R . .
H7C H 1.4070 0.8242 1.2274 0.157 Uiso 1 1 calc R . .
C8 C 1.7442(8) 1.2147(8) 1.3097(5) 0.061(3) Uani 1 1 d . . .
H8 H 1.7598 1.1781 1.3456 0.073 Uiso 1 1 calc R . .
C9 C 1.7860(8) 1.3193(9) 1.2989(5) 0.062(3) Uani 1 1 d . A .
H9 H 1.8281 1.3526 1.3286 0.075 Uiso 1 1 calc R . .
C10 C 1.7012(8) 1.3277(9) 1.2080(5) 0.060(3) Uani 1 1 d . A .
C11 C 1.6564(8) 1.2236(9) 1.2189(5) 0.063(3) Uani 1 1 d . . .
C12 C 1.5785(8) 1.1734(8) 1.1771(4) 0.109(5) Uani 1 1 d . . .
H12A H 1.5854 1.0929 1.1777 0.163 Uiso 1 1 calc R . .
H12B H 1.5893 1.2006 1.1375 0.163 Uiso 1 1 calc R . .
H12C H 1.5099 1.1938 1.1887 0.163 Uiso 1 1 calc R . .
C13 C 1.6758(9) 1.3925(8) 1.1514(4) 0.096(4) Uani 1 1 d RD . .
C15 C 1.1049(9) 1.2010(15) 1.4514(4) 0.094(8) Uani 0.50 1 d PRD . .
H15A H 1.1402 1.2364 1.4854 0.113 Uiso 0.50 1 calc PR . .
H15B H 1.1597 1.1694 1.4280 0.113 Uiso 0.50 1 calc PR . .
C16 C 1.0491(8) 1.0922(12) 1.4794(5) 0.079(3) Uani 1 1 d . . .
C17 C 1.0431(9) 0.9003(13) 1.4931(5) 0.086(4) Uani 1 1 d . . .
C18 C 1.083(2) 0.778(2) 1.4774(14) 0.117(10) Uani 0.50 1 d P . .
H18A H 1.1391 0.7834 1.4504 0.176 Uiso 0.50 1 calc PR . .
H18B H 1.0271 0.7353 1.4591 0.176 Uiso 0.50 1 calc PR . .
H18C H 1.1076 0.7407 1.5133 0.176 Uiso 0.50 1 calc PR . .
C19 C 1.063(2) 1.303(2) 1.4127(13) 0.135(11) Uani 0.50 1 d PDU . .
H19A H 1.0244 1.2753 1.3783 0.202 Uiso 0.50 1 calc PR . .
H19B H 1.1203 1.3477 1.4002 0.202 Uiso 0.50 1 calc PR . .
H19C H 1.0180 1.3487 1.4360 0.202 Uiso 0.50 1 calc PR . .
N1 N 1.3411(7) 0.9682(7) 1.3874(5) 0.065(2) Uani 1 1 d . . .
N2 N 1.5138(6) 0.9704(6) 1.3187(4) 0.0500(19) Uani 1 1 d . . .
N3 N 1.6809(7) 1.1660(6) 1.2683(4) 0.060(2) Uani 1 1 d . . .
N4 N 1.7689(6) 1.3750(7) 1.2479(4) 0.059(2) Uani 1 1 d . . .
N5 N 1.0910(7) 0.9907(9) 1.4718(4) 0.075(3) Uani 1 1 d . . .
O1 O 1.4804(9) 1.3822(9) 1.4682(5) 0.050(3) Uani 0.50 1 d PD A .
O2 O 1.4739(9) 1.5048(8) 1.4407(5) 0.042(3) Uani 0.50 1 d P . .
O3 O 1.5730(9) 1.5633(9) 1.4583(5) 0.045(3) Uani 0.50 1 d P . .
O4 O 1.3850(9) 1.5614(9) 1.4862(5) 0.044(3) Uani 0.50 1 d P . .
O5 O 1.7911(7) 1.3645(7) 1.6512(5) 0.117(3) Uani 1 1 d . A .
O8 O 1.8892(6) 1.5023(7) 1.4403(4) 0.099(3) Uani 1 1 d . A .
O9 O 1.7439(6) 1.6558(7) 1.4810(5) 0.128(4) Uani 1 1 d . . .
O11 O 1.6973(6) 1.1249(5) 1.4645(3) 0.076(2) Uani 1 1 d . A .
O12 O 1.6965(7) 1.5357(7) 1.3838(5) 0.112(3) Uani 1 1 d . A .
O13 O 1.5978(7) 1.7244(7) 1.4036(5) 0.122(4) Uani 1 1 d . . .
O15 O 1.5240(5) 1.4479(6) 1.3385(3) 0.0684(19) Uani 1 1 d . A .
O16 O 1.4258(5) 1.6394(5) 1.3584(3) 0.0653(18) Uani 1 1 d . . .
O17 O 1.4079(8) 1.2561(7) 1.3107(5) 0.127(4) Uani 1 1 d . A .
O18 O 1.3278(5) 1.4434(5) 1.3680(3) 0.0679(19) Uani 1 1 d . . .
O22 O 1.3059(6) 1.1201(6) 1.5204(4) 0.089(2) Uiso 1 1 d . A .
P1 P 1.5000 1.5000 1.5000 0.0528(10) Uani 1 2 d S . .
O6 O 1.7067(14) 1.2721(10) 1.5603(6) 0.064(4) Uani 0.606(16) 1 d P A 1
O7 O 1.8010(15) 1.4668(12) 1.5514(7) 0.077(5) Uani 0.606(16) 1 d P A 1
O10 O 1.7036(15) 1.3619(12) 1.4405(7) 0.074(4) Uani 0.606(16) 1 d P A 1
O14 O 1.5781(17) 1.643(2) 1.2801(10) 0.089(6) Uani 0.606(16) 1 d P A 1
O19 O 1.5657(14) 1.2808(14) 1.4129(8) 0.074(5) Uani 0.606(16) 1 d P A 1
O20 O 1.3732(9) 1.2828(12) 1.4427(7) 0.066(4) Uani 0.606(16) 1 d PD A 1
O21 O 1.5167(11) 1.2139(13) 1.5193(8) 0.066(5) Uani 0.606(16) 1 d P A 1
C14 C 1.5743(15) 1.458(2) 1.1600(9) 0.098(8) Uani 0.606(16) 1 d PD A 1
O6' O 1.6446(14) 1.2953(15) 1.5445(9) 0.046(5) Uani 0.394(16) 1 d P A 2
O7' O 1.7411(13) 1.4834(13) 1.5304(9) 0.047(5) Uani 0.394(16) 1 d P . 2
O10' O 1.7631(14) 1.3367(15) 1.4563(8) 0.044(5) Uani 0.394(16) 1 d P A 2
O14' O 1.6241(18) 1.650(3) 1.3001(13) 0.065(9) Uani 0.394(16) 1 d P A 2
O19' O 1.549(2) 1.2364(18) 1.3869(10) 0.057(6) Uani 0.394(16) 1 d P A 2
O20' O 1.3470(14) 1.2353(13) 1.4164(8) 0.047(5) Uani 0.394(16) 1 d P A 2
O21' O 1.4922(16) 1.1690(15) 1.4922(9) 0.052(6) Uani 0.394(16) 1 d P A 2
C14' C 1.7281(17) 1.4487(18) 1.1302(8) 0.047(7) Uani 0.394(16) 1 d P A 2
 
loop_
 _atom_site_aniso_label
 _atom_site_aniso_U_11
 _atom_site_aniso_U_22
 _atom_site_aniso_U_33
 _atom_site_aniso_U_23
 _atom_site_aniso_U_13
 _atom_site_aniso_U_12
Cu1 0.0656(9) 0.0590(7) 0.0887(10) -0.0119(7) 0.0287(7) -0.0045(7)
Cu2 0.0772(12) 0.1473(17) 0.1490(18) 0.0436(14) 0.0681(12) 0.0239(11)
Mo1 0.0771(7) 0.0615(6) 0.0710(7) 0.0114(5) 0.0086(5) 0.0117(5)
Mo2 0.0746(7) 0.0547(6) 0.1356(11) -0.0101(6) 0.0537(7) -0.0150(5)
Mo3 0.0684(7) 0.0661(6) 0.0691(7) 0.0133(5) 0.0154(5) -0.0088(5)
Mo4 0.0987(8) 0.0577(5) 0.0653(7) 0.0070(5) 0.0086(6) 0.0000(5)
Mo5 0.0704(7) 0.0384(5) 0.1594(12) 0.0256(6) 0.0384(7) -0.0049(4)
Mo6 0.1112(9) 0.0402(5) 0.1165(10) 0.0195(5) 0.0571(8) 0.0185(5)
C1 0.044(7) 0.060(6) 0.108(10) -0.001(7) 0.003(7) -0.008(5)
C2 0.055(7) 0.051(6) 0.078(8) -0.012(5) 0.010(6) -0.008(5)
C3 0.066(8) 0.096(8) 0.064(8) 0.020(6) 0.012(6) 0.034(7)
C4 0.047(6) 0.089(8) 0.058(7) -0.001(6) 0.005(5) 0.020(6)
C5 0.091(14) 0.40(4) 0.138(18) 0.01(2) 0.004(13) -0.10(2)
C6 0.109(14) 0.129(14) 0.145(16) -0.018(11) -0.021(11) 0.031(11)
C7 0.088(10) 0.132(12) 0.093(10) -0.048(9) -0.024(8) -0.002(8)
C8 0.069(7) 0.055(6) 0.060(7) 0.007(5) 0.026(6) 0.001(5)
C9 0.069(7) 0.064(6) 0.055(7) -0.013(5) 0.015(6) 0.002(6)
C10 0.059(7) 0.068(6) 0.054(6) -0.007(5) 0.010(6) -0.002(6)
C11 0.052(7) 0.072(7) 0.067(7) -0.012(6) 0.020(6) 0.004(6)
C12 0.103(11) 0.107(10) 0.115(11) -0.010(9) -0.007(9) -0.033(9)
C13 0.139(13) 0.099(10) 0.049(7) 0.025(7) -0.008(8) 0.030(9)
C15 0.047(14) 0.14(2) 0.094(19) 0.028(17) 0.014(13) -0.015(15)
C16 0.038(6) 0.130(11) 0.069(8) 0.017(7) 0.009(6) 0.021(7)
C17 0.043(7) 0.142(12) 0.073(8) 0.015(8) 0.003(6) 0.004(8)
C18 0.10(2) 0.13(2) 0.13(3) 0.03(2) 0.007(19) 0.036(19)
C19 0.134(14) 0.155(14) 0.115(14) 0.018(10) -0.004(9) 0.000(10)
N1 0.056(6) 0.066(5) 0.076(7) 0.027(5) 0.020(5) 0.014(4)
N2 0.035(5) 0.052(4) 0.064(6) 0.001(4) 0.011(4) 0.006(3)
N3 0.059(5) 0.049(5) 0.072(6) -0.010(5) 0.028(5) -0.004(4)
N4 0.053(5) 0.060(5) 0.066(6) 0.005(5) 0.023(5) 0.011(4)
N5 0.044(5) 0.114(8) 0.069(6) 0.011(6) 0.016(5) 0.000(6)
O1 0.057(8) 0.037(6) 0.057(8) 0.010(6) 0.014(6) -0.003(6)
O2 0.059(8) 0.035(6) 0.034(7) 0.008(5) 0.007(6) 0.006(6)
O3 0.050(7) 0.036(6) 0.051(7) 0.010(5) 0.013(6) 0.003(5)
O4 0.047(7) 0.042(6) 0.044(7) 0.014(5) -0.003(6) -0.003(5)
O5 0.088(6) 0.091(6) 0.170(9) 0.029(6) -0.004(6) 0.022(5)
O8 0.068(5) 0.125(7) 0.107(7) 0.036(5) 0.031(5) 0.026(5)
O9 0.063(5) 0.080(5) 0.236(12) -0.060(7) -0.042(7) 0.020(4)
O11 0.078(5) 0.059(4) 0.091(6) -0.007(4) 0.001(4) 0.016(4)
O12 0.082(6) 0.074(5) 0.178(9) -0.039(6) -0.035(6) 0.025(5)
O13 0.090(6) 0.089(6) 0.185(10) -0.063(6) -0.034(7) 0.012(5)
O15 0.067(5) 0.062(4) 0.076(5) 0.009(4) 0.005(4) 0.006(4)
O16 0.073(5) 0.054(4) 0.069(5) 0.017(3) 0.006(4) 0.000(3)
O17 0.122(8) 0.097(6) 0.164(10) -0.066(6) 0.035(7) -0.019(6)
O18 0.066(5) 0.058(4) 0.079(5) 0.007(4) -0.004(4) 0.005(3)
P1 0.054(2) 0.0288(15) 0.078(3) 0.0097(18) 0.033(2) -0.0024(16)
O6 0.076(11) 0.049(7) 0.069(9) 0.005(6) 0.017(8) -0.014(7)
O7 0.083(13) 0.067(8) 0.084(11) -0.006(7) 0.024(9) -0.025(9)
O10 0.083(12) 0.065(9) 0.075(10) -0.002(7) 0.008(9) 0.000(8)
O14 0.099(18) 0.091(11) 0.078(14) 0.034(10) 0.020(12) 0.005(14)
O19 0.077(11) 0.064(10) 0.084(13) 0.027(9) 0.031(10) 0.029(9)
O20 0.052(8) 0.072(10) 0.073(10) 0.017(8) 0.006(7) -0.011(7)
O21 0.054(9) 0.065(10) 0.079(11) 0.037(8) 0.009(8) 0.016(7)
C14 0.080(16) 0.133(18) 0.079(15) 0.030(13) -0.018(12) 0.053(14)
O6' 0.018(10) 0.054(10) 0.065(12) 0.014(9) 0.004(9) 0.011(8)
O7' 0.017(9) 0.043(9) 0.078(14) -0.010(8) -0.025(9) 0.015(7)
O10' 0.024(10) 0.044(10) 0.065(12) 0.019(8) -0.005(9) -0.005(8)
O14' 0.028(13) 0.102(17) 0.066(19) 0.051(15) 0.017(11) 0.021(13)
O19' 0.062(13) 0.051(13) 0.057(15) -0.019(9) -0.003(11) 0.019(10)
O20' 0.049(11) 0.034(9) 0.056(12) -0.009(8) -0.012(9) -0.029(8)
O21' 0.080(14) 0.030(9) 0.044(12) -0.001(8) -0.023(10) -0.016(9)
C14' 0.079(19) 0.042(13) 0.022(13) 0.025(10) 0.010(12) 0.014(12)
 
_geom_special_details
;
 All s.u.'s (except the s.u. in the dihedral angle between two l.s. planes)
 are estimated using the full covariance matrix.  The cell s.u.'s are taken
 into account individually in the estimation of s.u.'s in distances, angles
 and torsion angles; correlations between s.u.'s in cell parameters are only
 used when they are defined by crystal symmetry.  An approximate (isotropic)
 treatment of cell s.u.'s is used for estimating s.u.'s involving l.s. planes.
;
 
loop_
 _geom_bond_atom_site_label_1
 _geom_bond_atom_site_label_2
 _geom_bond_distance
 _geom_bond_site_symmetry_2
 _geom_bond_publ_flag
Cu1 N4 1.970(8) 2_847 ?
Cu1 N3 2.003(8) . ?
Cu1 N2 2.006(8) . ?
Cu2 N1 1.914(9) . ?
Cu2 N5 1.919(9) . ?
Mo1 O17 1.660(9) . ?
Mo1 O19' 1.88(2) . ?
Mo1 O15 1.897(7) . ?
Mo1 O18 1.911(7) . ?
Mo1 O20 1.960(13) . ?
Mo1 O20' 1.984(17) . ?
Mo1 O19 1.984(18) . ?
Mo1 O1 2.325(12) . ?
Mo2 O8 1.651(8) . ?
Mo2 O7' 1.67(2) . ?
Mo2 O10 1.895(14) . ?
Mo2 O9 1.909(8) . ?
Mo2 O12 1.911(10) . ?
Mo2 O10' 1.977(18) . ?
Mo2 O7 2.163(18) . ?
Mo2 O4 2.465(11) 3_888 ?
Mo3 O14' 1.58(3) . ?
Mo3 O14 1.78(2) . ?
Mo3 O15 1.891(7) . ?
Mo3 O12 1.895(8) . ?
Mo3 O13 1.898(8) . ?
Mo3 O16 1.901(7) . ?
Mo3 O3 2.352(11) . ?
Mo4 O5 1.647(9) . ?
Mo4 O18 1.896(7) 3_888 ?
Mo4 O6 1.910(12) . ?
Mo4 O16 1.921(7) 3_888 ?
Mo4 O7 1.932(13) . ?
Mo4 O7' 1.98(2) . ?
Mo4 O6' 2.011(19) . ?
Mo4 O4 2.289(11) 3_888 ?
Mo5 O22 1.660(8) . ?
Mo5 O20 1.704(13) . ?
Mo5 O9 1.874(8) 3_888 ?
Mo5 O13 1.902(10) 3_888 ?
Mo5 O21' 1.92(2) . ?
Mo5 O21 1.953(13) . ?
Mo5 O20' 2.228(19) . ?
Mo5 O1 2.472(11) . ?
Mo5 O3 2.498(11) 3_888 ?
Mo6 O6' 1.662(19) . ?
Mo6 O11 1.671(6) . ?
Mo6 O19 1.680(18) . ?
Mo6 O10 1.840(14) . ?
Mo6 O21 1.868(13) . ?
Mo6 O10' 2.044(17) . ?
Mo6 O21' 2.08(2) . ?
Mo6 O6 2.117(16) . ?
Mo6 O19' 2.23(2) . ?
Mo6 O4 2.469(11) 3_888 ?
C1 N1 1.360(14) . ?
C1 C2 1.372(15) . ?
C1 C6 1.488(19) . ?
C2 N2 1.334(12) . ?
C2 C7 1.518(15) . ?
C3 N1 1.300(14) . ?
C3 C4 1.385(15) . ?
C4 N2 1.336(12) . ?
C5 C6 1.41(3) . ?
C8 N3 1.344(13) . ?
C8 C9 1.380(14) . ?
C9 N4 1.334(12) . ?
C10 N4 1.348(12) . ?
C10 C11 1.390(14) . ?
C10 C13 1.51175 . ?
C11 N3 1.333(13) . ?
C11 C12 1.474(13) . ?
C13 C14' 1.07(2) . ?
C13 C14 1.540(15) . ?
C15 C19 1.577(18) . ?
C15 C16 1.618(18) . ?
C16 N5 1.335(14) . ?
C16 C17 1.361(15) 3_778 ?
C17 N5 1.336(15) . ?
C17 C16 1.361(15) 3_778 ?
C17 C18 1.59(3) . ?
N4 Cu1 1.970(8) 2_857 ?
O1 O2 1.584(14) . ?
O1 P1 1.587(11) . ?
O2 P1 1.363(12) . ?
O2 O3 1.491(16) . ?
O2 O4 1.700(16) . ?
O3 P1 1.545(11) . ?
O3 Mo5 2.498(11) 3_888 ?
O4 P1 1.668(11) . ?
O4 O7' 1.73(2) 3_888 ?
O4 Mo4 2.289(11) 3_888 ?
O4 Mo2 2.465(11) 3_888 ?
O4 Mo6 2.469(11) 3_888 ?
O9 Mo5 1.874(8) 3_888 ?
O13 Mo5 1.902(10) 3_888 ?
O16 Mo4 1.921(7) 3_888 ?
O18 Mo4 1.896(7) 3_888 ?
P1 O2 1.363(12) 3_888 ?
P1 O3 1.545(11) 3_888 ?
P1 O1 1.587(11) 3_888 ?
P1 O4 1.668(11) 3_888 ?
O7' O4 1.73(2) 3_888 ?
 
loop_
 _geom_angle_atom_site_label_1
 _geom_angle_atom_site_label_2
 _geom_angle_atom_site_label_3
 _geom_angle
 _geom_angle_site_symmetry_1
 _geom_angle_site_symmetry_3
 _geom_angle_publ_flag
N4 Cu1 N3 126.0(3) 2_847 . ?
N4 Cu1 N2 118.3(3) 2_847 . ?
N3 Cu1 N2 115.4(3) . . ?
N1 Cu2 N5 165.4(4) . . ?
O17 Mo1 O19' 87.8(8) . . ?
O17 Mo1 O15 102.8(4) . . ?
O19' Mo1 O15 93.7(9) . . ?
O17 Mo1 O18 102.5(4) . . ?
O19' Mo1 O18 169.1(7) . . ?
O15 Mo1 O18 87.5(3) . . ?
O17 Mo1 O20 113.6(6) . . ?
O19' Mo1 O20 88.6(9) . . ?
O15 Mo1 O20 143.7(5) . . ?
O18 Mo1 O20 84.1(4) . . ?
O17 Mo1 O20' 87.9(7) . . ?
O19' Mo1 O20' 88.8(10) . . ?
O15 Mo1 O20' 169.1(6) . . ?
O18 Mo1 O20' 88.1(6) . . ?
O20 Mo1 O20' 25.7(4) . . ?
O17 Mo1 O19 111.6(7) . . ?
O19' Mo1 O19 24.0(5) . . ?
O15 Mo1 O19 85.6(5) . . ?
O18 Mo1 O19 145.9(6) . . ?
O20 Mo1 O19 82.0(6) . . ?
O20' Mo1 O19 92.5(7) . . ?
O17 Mo1 O1 159.6(5) . . ?
O19' Mo1 O1 78.8(7) . . ?
O15 Mo1 O1 93.5(3) . . ?
O18 Mo1 O1 90.3(4) . . ?
O20 Mo1 O1 51.4(5) . . ?
O20' Mo1 O1 76.6(6) . . ?
O19 Mo1 O1 56.9(6) . . ?
O8 Mo2 O7' 117.2(7) . . ?
O8 Mo2 O10 110.2(6) . . ?
O7' Mo2 O10 89.3(7) . . ?
O8 Mo2 O9 102.9(4) . . ?
O7' Mo2 O9 80.8(7) . . ?
O10 Mo2 O9 146.3(6) . . ?
O8 Mo2 O12 101.8(4) . . ?
O7' Mo2 O12 140.9(7) . . ?
O10 Mo2 O12 79.3(6) . . ?
O9 Mo2 O12 88.3(4) . . ?
O8 Mo2 O10' 90.4(6) . . ?
O7' Mo2 O10' 83.2(8) . . ?
O10 Mo2 O10' 26.3(4) . . ?
O9 Mo2 O10' 162.7(7) . . ?
O12 Mo2 O10' 100.1(6) . . ?
O8 Mo2 O7 94.1(6) . . ?
O7' Mo2 O7 23.3(5) . . ?
O10 Mo2 O7 95.8(6) . . ?
O9 Mo2 O7 87.8(5) . . ?
O12 Mo2 O7 164.1(6) . . ?
O10' Mo2 O7 80.1(7) . . ?
O8 Mo2 O4 154.7(4) . 3_888 ?
O7' Mo2 O4 44.6(7) . 3_888 ?
O10 Mo2 O4 59.9(5) . 3_888 ?
O9 Mo2 O4 91.9(4) . 3_888 ?
O12 Mo2 O4 99.0(4) . 3_888 ?
O10' Mo2 O4 71.8(6) . 3_888 ?
O7 Mo2 O4 65.8(5) . 3_888 ?
O14' Mo3 O14 24.3(10) . . ?
O14' Mo3 O15 111.0(15) . . ?
O14 Mo3 O15 97.7(9) . . ?
O14' Mo3 O12 90.0(9) . . ?
O14 Mo3 O12 110.3(8) . . ?
O15 Mo3 O12 87.6(3) . . ?
O14' Mo3 O13 92.6(15) . . ?
O14 Mo3 O13 106.1(9) . . ?
O15 Mo3 O13 155.9(4) . . ?
O12 Mo3 O13 87.5(4) . . ?
O14' Mo3 O16 113.1(9) . . ?
O14 Mo3 O16 93.4(8) . . ?
O15 Mo3 O16 88.6(3) . . ?
O12 Mo3 O16 156.3(4) . . ?
O13 Mo3 O16 86.5(3) . . ?
O14' Mo3 O3 147.2(11) . . ?
O14 Mo3 O3 170.0(9) . . ?
O15 Mo3 O3 91.8(3) . . ?
O12 Mo3 O3 67.0(4) . . ?
O13 Mo3 O3 64.6(4) . . ?
O16 Mo3 O3 89.8(3) . . ?
O5 Mo4 O18 102.8(4) . 3_888 ?
O5 Mo4 O6 90.3(7) . . ?
O18 Mo4 O6 166.5(6) 3_888 . ?
O5 Mo4 O16 102.6(4) . 3_888 ?
O18 Mo4 O16 88.4(3) 3_888 3_888 ?
O6 Mo4 O16 91.9(5) . 3_888 ?
O5 Mo4 O7 90.8(8) . . ?
O18 Mo4 O7 90.4(5) 3_888 . ?
O6 Mo4 O7 86.1(6) . . ?
O16 Mo4 O7 166.5(7) 3_888 . ?
O5 Mo4 O7' 117.7(6) . . ?
O18 Mo4 O7' 85.4(5) 3_888 . ?
O6 Mo4 O7' 85.6(6) . . ?
O16 Mo4 O7' 139.6(5) 3_888 . ?
O7 Mo4 O7' 26.9(5) . . ?
O5 Mo4 O6' 115.8(7) . . ?
O18 Mo4 O6' 141.2(6) 3_888 . ?
O6 Mo4 O6' 26.5(4) . . ?
O16 Mo4 O6' 79.5(5) 3_888 . ?
O7 Mo4 O6' 93.1(6) . . ?
O7' Mo4 O6' 80.7(7) . . ?
O5 Mo4 O4 157.1(5) . 3_888 ?
O18 Mo4 O4 93.7(3) 3_888 3_888 ?
O6 Mo4 O4 72.8(6) . 3_888 ?
O16 Mo4 O4 93.6(3) 3_888 3_888 ?
O7 Mo4 O4 73.0(7) . 3_888 ?
O7' Mo4 O4 47.2(6) . 3_888 ?
O6' Mo4 O4 51.1(6) . 3_888 ?
O22 Mo5 O20 110.7(6) . . ?
O22 Mo5 O9 101.5(4) . 3_888 ?
O20 Mo5 O9 85.7(6) . 3_888 ?
O22 Mo5 O13 102.1(4) . 3_888 ?
O20 Mo5 O13 147.2(6) . 3_888 ?
O9 Mo5 O13 88.7(4) 3_888 3_888 ?
O22 Mo5 O21' 91.4(6) . . ?
O20 Mo5 O21' 78.5(7) . . ?
O9 Mo5 O21' 162.4(7) 3_888 . ?
O13 Mo5 O21' 100.4(6) 3_888 . ?
O22 Mo5 O21 108.2(5) . . ?
O20 Mo5 O21 90.7(6) . . ?
O9 Mo5 O21 149.4(6) 3_888 . ?
O13 Mo5 O21 78.1(6) 3_888 . ?
O21' Mo5 O21 25.6(5) . . ?
O22 Mo5 O20' 89.9(5) . . ?
O20 Mo5 O20' 20.7(5) . . ?
O9 Mo5 O20' 90.6(6) 3_888 . ?
O13 Mo5 O20' 167.8(5) 3_888 . ?
O21' Mo5 O20' 77.3(7) . . ?
O21 Mo5 O20' 96.7(7) . . ?
O22 Mo5 O1 155.1(4) . . ?
O20 Mo5 O1 49.7(5) . . ?
O9 Mo5 O1 92.8(4) 3_888 . ?
O13 Mo5 O1 98.5(4) 3_888 . ?
O21' Mo5 O1 71.1(6) . . ?
O21 Mo5 O1 62.7(5) . . ?
O20' Mo5 O1 69.4(5) . . ?
O22 Mo5 O3 159.4(4) . 3_888 ?
O20 Mo5 O3 86.7(6) . 3_888 ?
O9 Mo5 O3 67.8(4) 3_888 3_888 ?
O13 Mo5 O3 61.4(4) 3_888 3_888 ?
O21' Mo5 O3 103.3(6) . 3_888 ?
O21 Mo5 O3 81.7(6) . 3_888 ?
O20' Mo5 O3 107.2(5) . 3_888 ?
O1 Mo5 O3 45.5(4) . 3_888 ?
O6' Mo6 O11 114.8(7) . . ?
O6' Mo6 O19 135.5(8) . . ?
O11 Mo6 O19 109.5(6) . . ?
O6' Mo6 O10 96.0(8) . . ?
O11 Mo6 O10 109.5(6) . . ?
O19 Mo6 O10 72.7(9) . . ?
O6' Mo6 O21 67.6(8) . . ?
O11 Mo6 O21 108.2(5) . . ?
O19 Mo6 O21 95.0(8) . . ?
O10 Mo6 O21 142.3(8) . . ?
O6' Mo6 O10' 88.1(8) . . ?
O11 Mo6 O10' 91.1(6) . . ?
O19 Mo6 O10' 95.4(9) . . ?
O10 Mo6 O10' 25.6(5) . . ?
O21 Mo6 O10' 153.5(9) . . ?
O6' Mo6 O21' 91.6(8) . . ?
O11 Mo6 O21' 95.1(6) . . ?
O19 Mo6 O21' 80.2(8) . . ?
O10 Mo6 O21' 148.1(8) . . ?
O21 Mo6 O21' 24.4(6) . . ?
O10' Mo6 O21' 173.4(8) . . ?
O6' Mo6 O6 24.1(5) . . ?
O11 Mo6 O6 93.3(5) . . ?
O19 Mo6 O6 156.2(6) . . ?
O10 Mo6 O6 93.7(6) . . ?
O21 Mo6 O6 83.8(6) . . ?
O10' Mo6 O6 76.9(6) . . ?
O21' Mo6 O6 105.2(6) . . ?
O6' Mo6 O19' 150.3(8) . . ?
O11 Mo6 O19' 93.1(6) . . ?
O19 Mo6 O19' 17.5(7) . . ?
O10 Mo6 O19' 83.5(9) . . ?
O21 Mo6 O19' 94.8(9) . . ?
O10' Mo6 O19' 102.3(9) . . ?
O21' Mo6 O19' 74.9(9) . . ?
O6 Mo6 O19' 173.5(6) . . ?
O6' Mo6 O4 49.3(7) . 3_888 ?
O11 Mo6 O4 154.6(4) . 3_888 ?
O19 Mo6 O4 90.3(7) . 3_888 ?
O10 Mo6 O4 60.3(5) . 3_888 ?
O21 Mo6 O4 84.9(6) . 3_888 ?
O10' Mo6 O4 70.8(6) . 3_888 ?
O21' Mo6 O4 104.1(6) . 3_888 ?
O6 Mo6 O4 65.9(5) . 3_888 ?
O19' Mo6 O4 107.8(6) . 3_888 ?
N1 C1 C2 121.3(10) . . ?
N1 C1 C6 112.6(13) . . ?
C2 C1 C6 126.0(14) . . ?
N2 C2 C1 120.3(10) . . ?
N2 C2 C7 115.3(10) . . ?
C1 C2 C7 124.4(11) . . ?
N1 C3 C4 121.4(11) . . ?
N2 C4 C3 121.1(10) . . ?
C5 C6 C1 104.4(15) . . ?
N3 C8 C9 119.8(10) . . ?
N4 C9 C8 123.0(10) . . ?
N4 C10 C11 121.1(10) . . ?
N4 C10 C13 117.40 . . ?
C11 C10 C13 121.58 . . ?
N3 C11 C10 121.1(10) . . ?
N3 C11 C12 117.2(10) . . ?
C10 C11 C12 121.7(10) . . ?
C14' C13 C10 124.9(13) . . ?
C14' C13 C14 106.6(17) . . ?
C10 C13 C14 108.2(11) . . ?
C19 C15 C16 133.0(15) . . ?
N5 C16 C17 118.7(12) . 3_778 ?
N5 C16 C15 119.1(11) . . ?
C17 C16 C15 122.0(13) 3_778 . ?
N5 C17 C16 122.1(12) . 3_778 ?
N5 C17 C18 120.0(15) . . ?
C16 C17 C18 117.1(17) 3_778 . ?
C3 N1 C1 117.7(10) . . ?
C3 N1 Cu2 116.7(9) . . ?
C1 N1 Cu2 125.5(8) . . ?
C2 N2 C4 118.1(9) . . ?
C2 N2 Cu1 127.4(7) . . ?
C4 N2 Cu1 114.1(7) . . ?
C11 N3 C8 118.3(9) . . ?
C11 N3 Cu1 121.2(7) . . ?
C8 N3 Cu1 119.9(7) . . ?
C9 N4 C10 116.5(9) . . ?
C9 N4 Cu1 122.5(7) . 2_857 ?
C10 N4 Cu1 120.0(7) . 2_857 ?
C16 N5 C17 119.2(11) . . ?
C16 N5 Cu2 120.1(8) . . ?
C17 N5 Cu2 120.4(9) . . ?
O2 O1 P1 50.9(5) . . ?
O2 O1 Mo1 81.1(6) . . ?
P1 O1 Mo1 132.0(6) . . ?
O2 O1 Mo5 139.6(8) . . ?
P1 O1 Mo5 119.1(6) . . ?
Mo1 O1 Mo5 96.9(4) . . ?
P1 O2 O3 65.4(7) . . ?
P1 O2 O1 64.7(6) . . ?
O3 O2 O1 107.0(9) . . ?
P1 O2 O4 64.9(6) . . ?
O3 O2 O4 104.1(9) . . ?
O1 O2 O4 99.0(8) . . ?
O2 O3 P1 53.3(6) . . ?
O2 O3 Mo3 80.0(7) . . ?
P1 O3 Mo3 133.3(7) . . ?
O2 O3 Mo5 138.3(7) . 3_888 ?
P1 O3 Mo5 119.7(6) . 3_888 ?
Mo3 O3 Mo5 94.2(4) . 3_888 ?
P1 O4 O2 47.7(5) . . ?
P1 O4 O7' 136.2(8) . 3_888 ?
O2 O4 O7' 113.3(10) . 3_888 ?
P1 O4 Mo4 128.0(6) . 3_888 ?
O2 O4 Mo4 80.3(6) . 3_888 ?
O7' O4 Mo4 56.9(7) 3_888 3_888 ?
P1 O4 Mo2 118.7(5) . 3_888 ?
O2 O4 Mo2 137.8(7) . 3_888 ?
P1 O4 Mo6 116.1(5) . 3_888 ?
O2 O4 Mo6 130.9(7) . 3_888 ?
O7' O4 Mo6 104.9(7) 3_888 3_888 ?
Mo4 O4 Mo6 96.8(4) 3_888 3_888 ?
Mo2 O4 Mo6 91.3(4) 3_888 3_888 ?
Mo5 O9 Mo2 138.3(4) 3_888 . ?
Mo3 O12 Mo2 138.5(6) . . ?
Mo3 O13 Mo5 138.7(6) . 3_888 ?
Mo3 O15 Mo1 139.9(4) . . ?
Mo3 O16 Mo4 139.0(3) . 3_888 ?
Mo4 O18 Mo1 139.3(4) 3_888 . ?
O2 P1 O2 180.000(8) 3_888 . ?
O2 P1 O3 61.3(6) 3_888 3_888 ?
O2 P1 O3 118.7(7) . 3_888 ?
O2 P1 O3 118.7(7) 3_888 . ?
O2 P1 O3 61.3(6) . . ?
O3 P1 O3 180.000(5) 3_888 . ?
O2 P1 O1 115.6(6) 3_888 . ?
O2 P1 O1 64.4(6) . . ?
O3 P1 O1 75.7(6) 3_888 . ?
O3 P1 O1 104.3(6) . . ?
O2 P1 O1 64.4(6) 3_888 3_888 ?
O2 P1 O1 115.6(6) . 3_888 ?
O3 P1 O1 104.3(6) 3_888 3_888 ?
O3 P1 O1 75.7(6) . 3_888 ?
O1 P1 O1 180.0(4) . 3_888 ?
O2 P1 O4 67.4(6) 3_888 3_888 ?
O2 P1 O4 112.6(6) . 3_888 ?
O3 P1 O4 103.2(5) 3_888 3_888 ?
O3 P1 O4 76.8(6) . 3_888 ?
O1 P1 O4 79.8(6) . 3_888 ?
O1 P1 O4 100.2(6) 3_888 3_888 ?
O2 P1 O4 112.6(6) 3_888 . ?
O2 P1 O4 67.4(6) . . ?
O3 P1 O4 76.8(6) 3_888 . ?
O3 P1 O4 103.2(5) . . ?
O1 P1 O4 100.2(6) . . ?
O1 P1 O4 79.8(6) 3_888 . ?
O4 P1 O4 180.000(8) 3_888 . ?
Mo4 O6 Mo6 124.3(9) . . ?
Mo4 O7 Mo2 122.8(10) . . ?
Mo6 O10 Mo2 141.6(8) . . ?
Mo6 O19 Mo1 152.2(10) . . ?
Mo5 O20 Mo1 157.4(8) . . ?
Mo6 O21 Mo5 138.8(7) . . ?
Mo6 O6' Mo4 151.4(11) . . ?
Mo2 O7' O4 92.7(10) . 3_888 ?
Mo2 O7' Mo4 160.3(10) . . ?
O4 O7' Mo4 75.9(8) 3_888 . ?
Mo2 O10' Mo6 122.7(10) . . ?
Mo1 O19' Mo6 119.7(10) . . ?
Mo1 O20' Mo5 116.9(8) . . ?
Mo5 O21' Mo6 126.8(9) . . ?
 
_diffrn_measured_fraction_theta_max    0.999
_diffrn_reflns_theta_full              26.37
_diffrn_measured_fraction_theta_full   0.999
_refine_diff_density_max    1.453
_refine_diff_density_min   -1.312
_refine_diff_density_rms    0.278
